# Supplementary material for: Multicentre point-prevalence survey of antibiotic use and healthcare-associated infections in Ethiopian hospitals
Source: PubMed Central journal article supplement — BMJ Open. 2022 Feb 11;12(2):e054541. doi: 10.1136/bmjopen-2021-054541 (PMC8845215; doi:10.1136/bmjopen-2021-054541), 2022-02-11
Supplement: bmjopen-2021-054541.draft_revisions.pdf [file bmjopen-2021-054541.draft_revisions.pdf]

# BMJ Open

BMJ Open is committed to open peer review. As part of this commitment we make the peer review history of every article we publish publicly available.

When an article is published we post the peer reviewers' comments and the authors' responses online. We also post the versions of the paper that were used during peer review. These are the versions that the peer review comments apply to.

The versions of the paper that follow are the versions that were submitted during the peer review process. They are not the versions of record or the final published versions. They should not be cited or distributed as the published version of this manuscript.

BMJ Open is an open access journal and the full, final, typeset and author-corrected version of record of the manuscript is available on our site with no access controls, subscription charges or pay-per-view fees (<http://bmjopen.bmj.com>).

If you have any questions on BMJ Open's open peer review process please email [info.bmjopen@bmj.com](mailto:info.bmjopen@bmj.com)

# BMJ Open

## A multicenter Point Prevalence Survey of Antibiotic Use and Healthcare Acquired Infections in Ethiopian Hospitals

|                               |                                                                                                                                                                                                                                                                                                                                                                                                                                                                                                                                                                                                                                                                                                                                                                                                                                                                                                                                                                                                                                                                                                           |
|-------------------------------|-----------------------------------------------------------------------------------------------------------------------------------------------------------------------------------------------------------------------------------------------------------------------------------------------------------------------------------------------------------------------------------------------------------------------------------------------------------------------------------------------------------------------------------------------------------------------------------------------------------------------------------------------------------------------------------------------------------------------------------------------------------------------------------------------------------------------------------------------------------------------------------------------------------------------------------------------------------------------------------------------------------------------------------------------------------------------------------------------------------|
| Journal:                      | <i>BMJ Open</i>                                                                                                                                                                                                                                                                                                                                                                                                                                                                                                                                                                                                                                                                                                                                                                                                                                                                                                                                                                                                                                                                                           |
| Manuscript ID                 | bmjopen-2021-054541                                                                                                                                                                                                                                                                                                                                                                                                                                                                                                                                                                                                                                                                                                                                                                                                                                                                                                                                                                                                                                                                                       |
| Article Type:                 | Original research                                                                                                                                                                                                                                                                                                                                                                                                                                                                                                                                                                                                                                                                                                                                                                                                                                                                                                                                                                                                                                                                                         |
| Date Submitted by the Author: | 15-Jun-2021                                                                                                                                                                                                                                                                                                                                                                                                                                                                                                                                                                                                                                                                                                                                                                                                                                                                                                                                                                                                                                                                                               |
| Complete List of Authors:     | <p>Fentie, Atalay; Addis Ababa University College of Health Sciences, Pharmacology and Clinical Pharmacy; Addis Ababa University, School of Pharmacy</p> <p>Degefaw, Yidnekachew; Ethiopia Ministry of Health, Pharmaceuticals and Medical Equipment Directorate, Ministry of Health, Ethiopia</p> <p>Asfaw, Getachew; Ethiopia Ministry of Health, Pharmaceuticals and Medical Equipment Directorate, Ministry of Health, Ethiopia</p> <p>Shewarega, Wendosen ; Ethiopia Ministry of Health, Pharmaceuticals and Medical Equipment Directorate, Ministry of Health, Ethiopia</p> <p>Woldearegay, Mengistab ; World Health Organization Ethiopia Office, Addis Ababa, Ethiopia, World Health Organization Ethiopia Office, Addis Ababa, Ethiopia</p> <p>Abebe, Ephrem; Purdue University College of Pharmacy, School of Medicine, Indiana University, Indianapolis, IN, USA</p> <p>Gebretekle, Gebremedhin ; University of Toronto Institute of Health Policy Management and Evaluation, Toronto Health Economics and Technology Assessment (THETA) Collaborative, University Health Network, Canada.</p> |
| Keywords:                     | INFECTIOUS DISEASES, Public health < INFECTIOUS DISEASES, Health policy < HEALTH SERVICES ADMINISTRATION & MANAGEMENT, Quality in health care < HEALTH SERVICES ADMINISTRATION & MANAGEMENT                                                                                                                                                                                                                                                                                                                                                                                                                                                                                                                                                                                                                                                                                                                                                                                                                                                                                                               |
|                               |                                                                                                                                                                                                                                                                                                                                                                                                                                                                                                                                                                                                                                                                                                                                                                                                                                                                                                                                                                                                                                                                                                           |

SCHOLARONE™  
Manuscripts

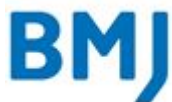

I, the Submitting Author has the right to grant and does grant on behalf of all authors of the Work (as defined in the below author licence), an exclusive licence and/or a non-exclusive licence for contributions from authors who are: i) UK Crown employees; ii) where BMJ has agreed a CC-BY licence shall apply, and/or iii) in accordance with the terms applicable for US Federal Government officers or employees acting as part of their official duties; on a worldwide, perpetual, irrevocable, royalty-free basis to BMJ Publishing Group Ltd ("BMJ") its licensees and where the relevant Journal is co-owned by BMJ to the co-owners of the Journal, to publish the Work in this journal and any other BMJ products and to exploit all rights, as set out in our [licence](#).

The Submitting Author accepts and understands that any supply made under these terms is made by BMJ to the Submitting Author unless you are acting as an employee on behalf of your employer or a postgraduate student of an affiliated institution which is paying any applicable article publishing charge ("APC") for Open Access articles. Where the Submitting Author wishes to make the Work available on an Open Access basis (and intends to pay the relevant APC), the terms of reuse of such Open Access shall be governed by a Creative Commons licence – details of these licences and which [Creative Commons](#) licence will apply to this Work are set out in our licence referred to above.

Other than as permitted in any relevant BMJ Author's Self Archiving Policies, I confirm this Work has not been accepted for publication elsewhere, is not being considered for publication elsewhere and does not duplicate material already published. I confirm all authors consent to publication of this Work and authorise the granting of this licence.

# A multicenter Point Prevalence Survey of Antibiotic Use and Healthcare Acquired Infections in Ethiopian Hospitals

Atalay Mulu Fentie<sup>1\*</sup>, Yidnekachew Degefaw<sup>2</sup>, Getachew Asfaw<sup>2</sup>, Wendosen Shewarega<sup>2</sup>, Mengistab Woldearegay<sup>3</sup>, Ephrem Abebe<sup>4,5†</sup>, Gebremedhin Beedemariam Gebretekle<sup>6,7†</sup>

†joint senior authors

<sup>1</sup>School of Pharmacy, College of Health Sciences, Addis Ababa University, Ethiopia.

<sup>2</sup>Pharmaceuticals and Medical Equipment Directorate, Ministry of Health, Ethiopia

<sup>3</sup>World Health Organization Ethiopia Office, Addis Ababa, Ethiopia.

<sup>4</sup>College of Pharmacy, Purdue University, West Lafayette, IN, USA

<sup>5</sup> School of Medicine, Indiana University, Indianapolis, IN, USA

<sup>6</sup>Institute of Health Policy, Management, and Evaluation, University of Toronto, Canada

<sup>7</sup>Toronto Health Economics and Technology Assessment (THETA) Collaborative, University Health Network, Canada.

**\*Correspondence author**

Atalay Mulu Fentie

Clinical and Pharmacology Department, School of Pharmacy, College of Health Sciences, Addis Ababa University, Ethiopia.

P.O.Box: 1176

Telephone: +251923295462

Email: [atalay.mulu@aau.edu.et](mailto:atalay.mulu@aau.edu.et)

**Word Count (Abstract): 300**

**Word Count (manuscript text) : 3716;**

**Tables: 05          Figure: 01**

**Keywords:** Antimicrobial resistance, AMR, Antimicrobial stewardship, Antibiotic, Ethiopia, Healthcare associated infection, HCAI, Point prevalence survey

## Abstract

**Objective:** Effective antimicrobial containment strategies such as Antimicrobial stewardship programs (ASP) require comprehensive data on antibiotics use which is scarce in Ethiopia. We assessed antibiotics use and healthcare-associated infections (HCAIs) in Ethiopia.

**Design:** We conducted a cross-sectional study using the WHO point-prevalence survey protocol for systemic antibiotics use and HCAIs for low- and middle-income countries.

**Setting:** The study was conducted among 10 public hospitals in 2021.

**Participants:** All patients treated at adult and pediatrics inpatient and emergency wards were enrolled and a total of 1820 patients were included.

**Outcome measure:** The primary outcome measures were the proportion of antibiotic use, HCAIs, and the hospitals' readiness to implement ASP.

**Results:** None of the surveyed hospitals had functional ASP during the survey. The prevalence of HCAIs was 39.6% and pneumonia was the most common bacterial infection (28.6%) followed by clinical sepsis (17.8%). Most treatments were empiric (96.7%) and the overall prevalence of antibiotic use was 63.8% with antibiotics prescription per patient ratio of 1.77. Nearly half (45.8%) of the patients were prescribed ceftriaxone and metronidazole. Age, having a retroviral infection, ward type, catheterization and intubation history and type of hospital had significant association with antibiotic use. Patients who were treated in pediatric surgical wards were about four times more likely to be on antibiotics compared to patients treated at an adult emergency ward. Patients on urinary catheter (AOR: 2.74, 95%CI:2.04,3.68) and intubation device (AOR= 2.62, 95%CI:1.02,6.76) were more likely to be on antibiotics than their non-catheterized/non-intubated counterparts. Patients treated at secondary level hospitals had 0.34 times decreased odds of being on antibiotics compared to patients treated at tertiary level.

**Conclusion:** Antibiotic use across the surveyed hospitals was common and most were empiric which had both practical and policy implications for the needs of strengthening ASP to promote rational antibiotics use.

## Strengths and limitations of the study

- Our study may not fully reflect long term antibiotic use patterns for Ethiopia as the point prevalence survey (PPS) was limited to selected secondary and tertiary public hospitals.
- This is the first multicenter PPS undertaken in Ethiopia using the standardized WHO PPS methodology thus allowing cross-country comparison.
- We generated valuable data for practitioners, hospital administrators and policymakers to strengthen implementation of antimicrobial stewardship programs.
- The findings can be used to guide future studies in Ethiopia and other low-middle income countries.

## Introduction

Since their discovery, antimicrobials have saved millions of lives, substantially reduced disease burden, improved the quality of life, and helped to increase life expectancy since their discovery [1]. However, Antimicrobial Resistance (AMR) is becoming a growing global health, social and economic threat to humans, animals and the environment [2]. About 700,000 people per year die due to AMR and, unless urgent measures are taken, AMR will lead to 10 million deaths and would cost the global economy up to US\$ 100 trillion by 2050. It is also predicted that AMR will disproportionately affect low- and middle-income countries (LMICs) [3]. As a result, containing and controlling AMR demands multi-sectoral collaboration and coordinated actions across diverse sectors and disciplines [4].

Although AMR is a complex problem with many interrelated contributors, the key drivers to the emergence of AMR are misuse and overuse of antimicrobials which are increasing globally [5,6]. There is also a strong correlation between antibiotic consumption and the emergence of resistant microbes [7–10]. To address this issue, the World Health Organization (WHO) has developed a Global Action Plan (GAP)[6], which included strategies for optimizing antimicrobial use and regular monitoring of antibiotic use and healthcare associated infections (HCAIs), using a standardized point prevalence survey (PPS) methodology [11].

Various Ethiopian studies had shown the problems of misuse and overuse of antibiotics [12–14] and widespread resistance of bacterias for locally available antibiotics including carbapenems [15,16]. Responding to this global health priority and in an attempt to optimize antibiotic use and contain AMR, the government of Ethiopia adapted the GAP and implemented different AMR prevention and containment strategies where Antimicrobial Stewardship Program (ASP) is one of them. Despite these high-level initiatives, both at regional and facility levels, a general picture of antibiotic use, rate of HCAIs, quality of prescribing, using a context-appropriate PPS methodology is lacking [11]. Hence, this multicenter PPS survey aimed to collect baseline information about antibiotic use, prevalence of HCAIs, distribution of these infections according to infection site and pathogen, and quality of antibiotic prescribing among selected public hospitals in Ethiopia.

1  
2  
3 The data could be utilized to raise antibiotic usage awareness, as well as to plan and  
4 support national and local stewardship initiatives.  
5  
6  
7  
8  
9  
10  
11  
12  
13  
14  
15  
16  
17  
18  
19  
20  
21  
22  
23  
24  
25  
26  
27  
28  
29  
30  
31  
32  
33  
34  
35  
36  
37  
38  
39  
40  
41  
42  
43  
44  
45  
46  
47  
48  
49  
50  
51  
52  
53  
54  
55  
56  
57

For peer review only



## Methods

### Study design and setting

A multi-center cross-sectional study was conducted in Ethiopian hospitals in January 2021. We adopted a WHO methodology for PPS of HCAs and systemic antibiotic use in LMICs Version 1.1[11]. Ethiopia has a three-tier healthcare system namely primary, secondary, and tertiary levels. The estimated numbers of hospitals in Ethiopia were about 439 at any level (353 public, 86 private) of which 25 were tertiary, 58 secondary and 381 primary hospitals. For this survey, we have included five secondary and five tertiary care level hospitals (Supplementary file).

### Eligibility criteria

The inclusion criteria were first applied to the wards in 10 selected hospitals, then to patients in the selected wards, and finally to the antibiotics prescribed and dispensed to those patients as per the WHO PPS methodology in LMICs Version 1.1[11]. We included all patients who were admitted in acute care wards namely the adult and pediatric medical, emergency, gynecology/obstetrics, surgery, intensive care unit (ICU) and oncology-hematology wards at or before 08:00 AM on the day of the survey irrespective of whether they were receiving antibiotic treatment or not and with complete medical record.

We included only oral and parenteral antibiotics when the patient was on active antibiotic therapy at 08:00 AM on the day of the survey. For instance, if a patient was on treatment with antibiotic-A at 08:00 AM on the day of the survey but the treatment was changed to antibiotic-B at 10:00 AM, then only antibiotic-A was reported.

### Outcome variables

The outcome variables were prevalence of antibiotic use, proportion of HCAs among hospitalized patients and existence of functional ASP. We considered functional ASP when hospitals had been providing at least prospective audit and feedback, preauthorization or formulary restriction. The independent variables were types of the hospital and ward, patients' socio-demographics, clinical and treatment related characteristics.

## Sample size determination and sampling technique

The 10 surveyed hospitals were purposively selected from 30 public hospitals currently implementing ASP. For hospitals with <500 bed capacity, all eligible participants were surveyed. For those with 500-800 bed capacity, every other patient was surveyed following an alphabetical listing of all eligible in-patients on the day of data collection. The next available record was included if a selected patient or medical record was not available. A consistent approach was employed across wards to ensure fidelity to predefined study procedures. Altogether, 2,209 eligible patients were admitted during the survey period, and a total of 1,820 patients were included in the survey and final data analyses (Figure 1).

## Data collection and management

A total of 100 patients, 10 from each of the participating hospitals, were used to pilot test the survey instrument. Trained data collectors conducted the survey (one ASP chair/secretary and two clinical pharmacists per hospital). Data quality was assured through implementation of a field manual guiding data collectors, regular supervision, and daily checks on data completeness, accuracy, and clarity.

## Data analysis and interpretation

Data were analyzed using SPSS version 26. Descriptive analyses such as frequency and percentage were used to summarize the data. A multivariable logistic regression analysis was used to explore factors affecting antimicrobial use. A *p*-value of <0.05 was considered statistically significant.

## Results

### Demographic characteristics of patients

The mean age of patients was  $27.7 \pm 22.1$  years and the majority (690, 37.9%) of patients were in the age group of 18-39 years. There were about 90 preterm babies and most (39, 43.3%) of them were late preterm. Out of the 1820 patients included in the survey, majority of them were from adult medical (340, 18.7%), adult surgical (330, 18.1%), and obstetrics/gynecology (309, 17.0%). Five hundred one (27.5%) patients were found to be transferred from other hospitals and 562 (30.9%) had a previous history of hospitalization in the last 90 days. Moreover, 194(10.7%) of the patients had retroviral infection, 76(4.2%) had active tuberculosis, and 277(15.2%) of patients were malnourished. A peripheral vascular catheter was secured in a significant number of patients (1535, 84.3%) (Table 1).

**Table 1: Characteristics of patients**

| Variable, N= 1820                         | N(%)      |
|-------------------------------------------|-----------|
| Sex                                       |           |
| Male                                      | 848(46.6) |
| Female                                    | 972(53.4) |
| Age in years                              |           |
| 0-17                                      | 616(33.8) |
| 18 – 39                                   | 690(37.9) |
| 40-64                                     | 371(20.4) |
| ≥ 65                                      | 143(7.9)  |
| Type of preterm for pre-term babies, N=90 |           |
| Late preterm                              | 39(43.3)  |
| Moderate preterm                          | 26(28.9)  |
| Very preterm                              | 24(26.7)  |
| Extremely preterm                         | 1(0.1)    |
| Ward type                                 |           |
| Pediatric medical ward                    | 146(8.0)  |
| Pediatric emergency ward                  | 120(6.6)  |
| Pediatric surgical ward                   | 56(3.1)   |
| Pediatric Intensive Care Unit             | 13(0.7)   |
| Pediatric high risk wards                 | 42(2.3)   |
| Neonatal intensive care unit              | 184(10.1) |
| Adult medical ward                        | 340(18.7) |

|                                                                              |            |
|------------------------------------------------------------------------------|------------|
| Adult emergency ward                                                         | 181(9.9)   |
| Adult surgical ward                                                          | 330(18.1)  |
| Adult intensive care unit                                                    | 57(3.1)    |
| Obstetrics & Gynecology                                                      | 309(17.0)  |
| Adult high risk wards                                                        | 42(2.3)    |
| Current hospitalization malarial status                                      |            |
| Yes                                                                          | 33(1.8)    |
| No                                                                           | 1439(79.1) |
| Unknown                                                                      | 348(19.1)  |
| Previous malarial treatment history                                          |            |
| Yes                                                                          | 41(2.3)    |
| No                                                                           | 1517(83.3) |
| Unknown                                                                      | 262(14.4)  |
| Active tuberculosis                                                          |            |
| Yes                                                                          | 76(4.2)    |
| No                                                                           | 1499(82.4) |
| Unknown                                                                      | 245(13.4)  |
| Retroviral infection status                                                  |            |
| Positive                                                                     | 194(10.7)  |
| Negative                                                                     | 1421(78.0) |
| Unknown                                                                      | 205(11.3)  |
| Patients having chronic obstructive pulmonary diseases                       | 28(1.5)    |
| Patients with Malnutrition                                                   | 277(15.2)  |
| Referred from another hospital                                               | 501(27.5)  |
| Patients having hospitalization history within 90 days                       | 562(30.9)  |
| Patients on peripheral vascular catheter at 8:00 AM on the day of the survey | 1535(84.3) |
| Patients on urinary catheter at 8:00 AM on the day of the survey             | 403(22.1)  |
| Patients on intubation at 8:00 AM on the day of the survey                   | 71(3.9)    |

---

## Indications for Antibiotics

The most common indication for antibiotics was HCAI (461, 39.6%). Eight hundred eighty-seven patients had a documented infection, the most common being pneumonia (254,

28.6%) followed by bloodstream infection or clinical sepsis (158, 17.8%) and central nervous system (CNS) infections (118, 13.3%)(Table 2).

**Table 2: Indication for antibiotics and types of infections.**

| Variable                                                              | N(%)                             |               |
|-----------------------------------------------------------------------|----------------------------------|---------------|
| <b>Indication, n= 1162</b>                                            | Healthcare associated infections | 460(39.6)     |
|                                                                       | Community acquired infection     | 394(33.9)     |
|                                                                       | Surgical prophylaxis             | 218(18.8)     |
|                                                                       | Medical prophylaxis              | 71(6.1)       |
|                                                                       | HCAI and medical prophylaxis     | 6(0.5)        |
|                                                                       | CAI and medical prophylaxis      | 9(0.8)        |
|                                                                       | Unknown                          | 4(0.3)        |
|                                                                       | <b>Types of infection, n=887</b> | CNS infection |
| Clinical sepsis                                                       |                                  | 158(17.8)     |
| Pneumonia                                                             |                                  | 254(28.6)     |
| Gastro-intestinal infection                                           |                                  | 43(4.8)       |
| Cellulitis, wound, deep soft tissue infection; not related to surgery |                                  | 61(6.9)       |
| Gynaecological infection                                              |                                  | 30(3.4)       |
| Symptomatic upper urinary tract infection                             |                                  | 59(6.7)       |
| Cardio-vascular infection                                             |                                  | 19(2.1)       |
| Intra-abdominal infection                                             |                                  | 35(3.9)       |
| Surgical site infection involving skin or soft tissue but not bone    |                                  | 39(4.4)       |
| Others*                                                               |                                  | 71(8.0)       |

\*Others: Febrile neutropenia, sexually transmitted infection, Infection of ear, nose and throat, Cystic fibrosis, Symptomatic lower urinary tract infection, acute bronchitis and exacerbation of Asthma, Septic arthritis of surgical site, prostatitis, Systemic inflammatory response with no clear anatomical site, completely undefined site.

### Microbiological tests

Microbiological diagnostics for patients treated for HCAs and CAs were rarely ordered during the survey period (119, 13.6%). If ordered, most of them were blood samples alone (53, 44.5%), followed by urine culture (26, 21.9%). Moreover, a great proportion of the results were unknown or not reported/collected (52, 43.7%). Out of 41 isolated microorganisms, about two-thirds (28, 68.3%) were gram-negative bacteria. *Escherichia coli* (8, 19.5%) and *Klebsiella pneumoniae* (7, 17.1%) were the commonest isolated bacteria. About 21 resistant phenotypes were reported and most (13, 61.9%) were third generation cephalosporin resistant Enterobacteriaceae followed by methicillin resistant *staphylococcus aureus* (3,14.3%) and Carbapenem Resistant Enterobacteriaceae (3, 14.3%) (Table 3).

**Table 3: Microbiological diagnostics and culture and sensitivity results**

| Variable                                                      | N(%)      |
|---------------------------------------------------------------|-----------|
| Sample collected for microbiological workup, N= 870 patients* |           |
| Yes                                                           | 119(13.6) |
| No                                                            | 693(79.7) |
| Unknown                                                       | 58(6.7)   |
| Specimen type, N=119 patients                                 |           |
| Blood                                                         | 53(44.5)  |
| Urine                                                         | 26(21.9)  |
| Cerebrospinal Fluid                                           | 13(10.9)  |
| Pus                                                           | 11(9.2)   |
| Blood and urine                                               | 8(6.7)    |
| Blood and CSF                                                 | 6(5.1)    |
| Peritoneal fluid                                              | 2(1.7)    |
| Culture result, N=119 patients                                |           |
| Positive                                                      | 38(31.9)  |
| Negative                                                      | 29(24.4)  |
| Unknown                                                       | 52(43.7)  |
| Isolated microorganism, N=41 **                               |           |
| Gram positive bacteria                                        | 13(31.7)  |
| Gram negative bacteria                                        | 28(68.3)  |

|                                   |                                                                       |          |
|-----------------------------------|-----------------------------------------------------------------------|----------|
| Type of isolated bacteria, N=41** |                                                                       |          |
|                                   | <i>Escherichia coli</i>                                               | 8(19.5)  |
|                                   | <i>Klebsiella pneumoniae</i>                                          | 7(17.1)  |
|                                   | <i>Klebsiella oxytoca</i>                                             | 4(9.8)   |
|                                   | <i>Acinetobacter</i>                                                  | 4(9.8)   |
|                                   | <i>Staphylococcus aureus</i>                                          | 4(9.8)   |
|                                   | <i>Enterobacter aerogenes</i>                                         | 3(7.3)   |
|                                   | <i>Enterococcus</i>                                                   | 3(7.3)   |
|                                   | Coagulase negative <i>staphylococcus</i> , contaminant                | 3(7.3)   |
|                                   | Others#                                                               | 5(12.2)  |
| Resistant phenotype, N=21         |                                                                       |          |
|                                   | 3 <sup>rd</sup> Generation Cephalosporin Resistant Enterobacteriaceae | 13(61.9) |
|                                   | Methicillin Resistant <i>Staphylococcus aureus</i>                    | 3(14.3)  |
|                                   | Carbapenem Resistant Enterobacteriaceae                               | 3(14.3)  |
|                                   | Carbapenem Resistant <i>Pseudomonas aeruginosa</i>                    | 1(4.8)   |
|                                   | Carbapenem Resistant <i>Acinetobacter</i>                             | 1(4.8)   |

\*only for those whose indication type is for healthcare associated infection and community acquired infection.

\*\*for one patient *Klebsiella oxytoca* from blood and *Klebsiella pneumoniae* from urine, from another patient *streptococcus* from blood and *Klebsiella Pneumoniae* from blood and from another one *Klebsiella Pneumoniae* from urine and *Acinetobacter* from blood were isolated. #*Pseudomonas aeruginosa*, *Citrobacter*, Gram positive cocci, Group A streptococcus, Group D streptococcus.

### Readiness to implement ASP

All surveyed hospitals had functional infection prevention and control committee and only eight hospitals had functional Drugs and Therapeutics Committee. Although a defined organizational structure for ASP was present in all the surveyed hospitals, formal ASP team was only available in seven (70%) of the hospitals and none of them were functional during the survey period. None of the hospitals were monitored antibiotic use as per defined daily dose or days of therapy and hospital activity denominator. Eight of the surveyed hospitals have microbiological services in the hospitals and the mean number blood cultures done in for the previous fiscal year 2019/2020 were about 2625 ±3307. Different classes of broad and narrow spectrum antibiotics were stock out during the survey period (Supplementary file).

## Antibiotics use prevalence and indication

Of the 1820 surveyed patients, 63.8% had at least one antibiotic prescription on the day of the survey. The prevalence of antibiotic use was higher in adult intensive care unit patients (49, 86.0%) followed by pediatric emergency (112, 76.7%) and pediatric medical (94, 78.3%) wards.

On the day of the survey, 2059 antibiotics were prescribed for 1162 patients with antibiotics prescribing ratio of 1.77 per patient. More than half (585, 50.3%) of patients were on two antibiotics. The largest shares of antibiotics were prescribed in their generic name (1998, 97.1%) and were administered parentally (1858, 90.2%). The mean duration of treatment from initiation to survey date was  $7.72 \pm 7.9$  days. A significantly higher proportion of treatments were empiric (837, 96.7%). As per the WHO definition of guideline compliance[11], only 54.8% (n=637) of the treatments were compliant with the guideline (Supplementary file).

As shown in Table 4, the most widely prescribed antibiotics across all surveyed hospitals were ceftriaxone (626, 30.4%) followed by metronidazole (317, 15.4%), ampicillin (249, 12.1%) and vancomycin (217, 10.5%).

**Table 4: Proportion patients on antibiotics and types of antibiotics prescriptions**

| Antibiotics                                  | N(%)       |
|----------------------------------------------|------------|
| <b>Proportion of patients on antibiotics</b> |            |
| Pediatric medical ward                       | 112(76.7%) |
| Pediatric emergency ward                     | 94(78.3%)  |
| Pediatric surgical ward                      | 41(73.2%)  |
| Pediatric Intensive Care Unit                | 9(69.2%)   |
| Pediatric high risk wards                    | 32(76.2%)  |
| Neonatal intensive care unit                 | 140(76.1%) |
| Adult medical ward                           | 199(58.5%) |
| Adult emergency ward                         | 97(53.6%)  |
| Adult surgical ward                          | 219(66.4%) |



|                           |            |
|---------------------------|------------|
| Adult intensive care unit | 49(86%)    |
| Adult high risk ward      | 13(31%)    |
| Obstetrics & Gynecology   | 157(50.8%) |

### Types of antibiotics prescribed

|                                |                  |
|--------------------------------|------------------|
| Ceftriaxone                    | 626(30.4)        |
| Metronidazole                  | 317(15.4)        |
| Ampicillin                     | 249(12.1)        |
| Vancomycin                     | 217(10.5)        |
| Gentamycin                     | 178(8.6)         |
| Ceftazidime                    | 116(5.6)         |
| Trimethoprim/Sulphamethoxazole | 72(3.5)          |
| Cloxacillin                    | 49(2.4)          |
| Ciprofloxacin                  | 42(2.0)          |
| Cefepime                       | 40(1.9)          |
| Meropenam                      | 39(1.9)          |
| Azithromycin                   | 25(1.2)          |
| Amoxicillin                    | 20(1.0)          |
| Cefotaxime                     | 13(0.6)          |
| Amoxicillin-Clavulanate        | 12(0.6)          |
| Cephalexin                     | 9(0.4)           |
| Others*                        | 35(1.7)          |
| <b>Total</b>                   | <b>2059(100)</b> |

\*Crystalline-penicillin= 6; Erythromycin= 6; Norfloxacin = 5; Benzathine penicillin= 4; Clindamycin= 4; Doxycycline = 3; Chloramphenicol= 2; Clarithromycin = 1; Nitrofurantoin= 1; Cefixime = 1; Ampicillin-sulbactam = 1

### Factors associated with antibiotic use

From the multivariable analysis, age, ward type, hospital type, catheterization and intubation history, and retroviral infection status were significantly associated with being on antibiotics. Patients aged between 18-39 years (AOR= 0.61, 95%CI: 0.38,0.86) and 40-64 years old (AOR=0.55, 95%CI: 0.39, 0.93) had a decreased odds of being on antibiotics

compared with patients from 0 to 17 years old. Moreover, patients treated at pediatrics medical and emergency ward were about four times more likely to be on antibiotics compared to patients treated in adult emergency ward. The study also found that being on urinary catheter and intubation device had a significant association with antibiotics use status, where they were nearly three times more likely to be on antibiotics as compared with their catheterized/intubated counterparts (Table 5).

**Table 5: Univariate and multivariable binary logistic regression analysis of predictors of antibiotics use among the surveyed hospitals**

| Variables                             | Patient on antibiotics |           | COR, 95%CI         | AOR, 95%CI         |
|---------------------------------------|------------------------|-----------|--------------------|--------------------|
|                                       | Yes, n(%)              | No, n(%)  |                    |                    |
| <b>Age in years</b>                   |                        |           |                    |                    |
| 0-17                                  | 460(39.6)              | 156(23.7) | 1.00               | 1.00               |
| 18-39                                 | 406(34.9)              | 284(43.6) | 0.49(0.38,0.61)**  | 0.61(0.38,0.86)*   |
| 40-64                                 | 211(18.2)              | 160(24.3) | 0.45(0.34, 0.59)*  | 0.55(0.39, 0.93)*  |
| ≥ 65                                  | 85(7.3)                | 58(8.8)   | 0.5(0.34, 0.73)**  | 1.45(0.31, 3.59)   |
| <b>Gender</b>                         |                        |           |                    |                    |
| Female                                | 584(50.3)              | 388(59.0) | 1.00               | 1.00               |
| Male                                  | 578(49.7)              | 270(41.0) | 1.42(1.17, 1.73)*  | 1.18(0.93, 1.49)   |
| <b>Ward type</b>                      |                        |           |                    |                    |
| Pediatric medical                     | 112(9.6)               | 34(5.2)   | 2.85(1.76, 4.62)*  | 3.78(1.81, 7.9)**  |
| Pediatric surgical                    | 41(3.5)                | 15(2.3)   | 2.37(1.22, 4.58)   | 2.31(0.96, 5.51)   |
| Pediatric high risk                   | 32(27.5)               | 10(1.5)   | 2.77(1.29, 5.97)   | 4.15(1.59, 10.8)*  |
| Pediatric ICU                         | 9(0.8)                 | 4(0.6)    | 1.95(0.58, 6.56)   | 1.57(0.38, 6.50)   |
| Pediatric emergency                   | 94(8.1)                | 26(4.0)   | 3.13(1.86, 5.28)*  | 4.22(1.98, 9.02)** |
| Neonatal ICU                          | 140(12.0)              | 44(6.7)   | 2.76(1.76, 4.31)*  | 3.27(1.59, 6.67)*  |
| Adult medical                         | 199(17.1)              | 141(21.4) | 1.22(0.85, 1.76)   | 1.31(0.89, 1.92)   |
| Adult surgical                        | 219(18.8)              | 111(16.9) | 1.71(1.18, 2.48)   | 2.00(1.36, 2.95)** |
| Adult high risk                       | 13(1.1)                | 29(4.4)   | 0.39(0.19, 0.79)   | 0.45(0.22, 0.96)*  |
| Adult ICU                             | 49(4.2)                | 8(1.2)    | 5.30(2.38, 11.83)* | 2.68(1.05, 6.88)   |
| Gyn/Obs                               | 157(13.5)              | 152(23.1) | 0.89(0.62, 1.29)   | 0.83(0.54, 1.27)   |
| Adult emergency                       | 97(8.3)                | 84(12.8)  | 1.00               | 1.00               |
| <b>Urinary catheterization status</b> |                        |           |                    |                    |
| No                                    | 846(72.8)              | 571(86.8) | 1.00               | 1.00               |
| Yes                                   | 316(27.2)              | 87(13.2)  | 2.45(1.89, 3.18)*  | 2.74(2.04, 3.68)*  |
| <b>Intubation status</b>              |                        |           |                    |                    |
| No                                    | 1098(94.5)             | 650(98.8) | 1.00               | 1.00               |
| Yes                                   | 63(5.5)                | 8(1.2)    | 4.66(2.22, 9.79)*  | 2.62(1.02, 6.76)** |
| <b>Retroviral infection status</b>    |                        |           |                    |                    |
| Yes                                   | 161(13.9)              | 33(5.0)   | 1.00               | 1.00               |
| No                                    | 867(74.6)              | 554(84.2) | 0.32(0.22,0.47)**  | 0.19(0.13,0.30)**  |
| Unknown                               | 134(11.5)              | 71(10.8)  | 0.39(0.24,0.62)**  | 0.24(0.15,0.40)**  |

1  
2  
3  
4  
5  
6  
7  
8  
9  
10  
11  
12  
13  
14  
15  
16  
17  
18  
19  
20  
21  
22  
23  
24  
25  
26  
27  
28  
29  
30  
31  
32  
33  
34  
35  
36  
37  
38  
39  
40  
41  
42  
43  
44  
45  
46  
47  
48  
49  
50  
51  
52  
53  
54  
55  
56  
57  
58  
59  
60

**Within 90 days****hospitalization history**

|     |           |           |                  |                  |
|-----|-----------|-----------|------------------|------------------|
| Yes | 366(31.5) | 196(29.8) | 1.00             | 1.00             |
| No  | 796(68.5) | 462(70.2) | 0.93(0.75, 1.14) | 0.85(0.67, 1.06) |

**Length of hospitalization in days**

|  |  |  |                   |                  |
|--|--|--|-------------------|------------------|
|  |  |  | 0.998(0.99, 1.00) | 1.00(0.99, 1.01) |
|--|--|--|-------------------|------------------|

**Hospital type**

|                |           |           |                   |                   |
|----------------|-----------|-----------|-------------------|-------------------|
| Secondary care | 623(53.6) | 304(46.2) | 1.00              | 1.00              |
| Tertiary care  | 539(46.4) | 354(53.8) | 0.74(0.61, 0.90)* | 0.66(0.53, 0.81)* |

---

\* $p < 0.05$ , \*\*statistically significant at  $p < 0.0001$ . AOR: Adjusted odds ratio; COR: Crude odds ratio

For peer review only

## Discussion

Antimicrobial resistance is becoming a global threat exacting a major toll on human, animal, and environmental health [17–20]. Ethiopia, like many nations, has not been immune from the negative effects of AMR [16,21,22]. While there have been initiatives to address this pressing health challenge, the few national and institutional efforts have had limited success. Mounting an effective national response to combat AMR requires robust information on the scope of infections and antimicrobial agents being used in healthcare institutions. Using the WHO's standardized PPS methodology, this study assessed the burden of HCAs and antibiotic use in selected public hospitals of Ethiopia.

Similar to studies done elsewhere [13,23,24], the most common indication for antibiotics therapy was for HCAs (39.6%) where most of them were pneumonia and clinical sepsis. This high burden of infections might be a reason for misuse and overuse of antibiotics, potentially straining the already resource constrained hospitals, patients, and family caregivers[13]. Hence, efforts to effectively treat, prevent, and reduce HCAs are needed. To achieve these, implementing interventions such as strengthening and integrating infection prevention and control practice, developing and enforcing the use of institution specific standard treatment guidelines, providing in-service trainings are needed. Strengthening microbiology laboratories to guided definitive treatment is also invaluable towards achievement of this goal.

Prescribing broad-spectrum antibiotics empirically (96.7%) was a common and persistent practice across the surveyed hospitals like other studies done in LMICs [24-27]. This could be owing to the hospital's inavailability and poor utilization of microbiology services, as seen by the hospitals' limited use of culture and sensitivity tests. Including this study (63.8%), this might also be a reason why overuse of antibiotics is common in LMICs, ranging from 70.6% to 80.1% [24-27] compared with studies from HICs (27.1-50.3%) [23,28–30]. An internet-based PPS done across 53 countries (LMICs and HICs) has also reported higher antimicrobial use in LMICs compared to HICs[31].

An enduring overuse of antibiotics for a prolonged duration in many LMICs compared to HICs [13,26,32] might be attributed to lack of a national and institutional antibiotic

1  
2  
3 guideline and poor diagnostic infrastructure which both can promote empiric as well as  
4 high rates of irrational antibiotic use. Although most of the surveyed hospitals had  
5 microbiological services, only one hospital developed institutional guideline as per the  
6 antibiogram data. This is also a clear sign of poor utilization of the microbiology services to  
7 guide empiric antibiotic use and highlights the missed opportunities in promoting rational  
8 antibiotic use [33]. Recently, a pharmacist-led ASP implemented in one of the tertiary care  
9 hospitals of Ethiopia was well received and shown to be beneficial [13]. Lessons from such  
10 programs, including knowledge of ongoing barriers to scale up and sustain these programs,  
11 should be leveraged to promote widespread adoption of ASP to decrease antibiotic  
12 consumption, save costs, and improve outcomes. Additionally, improving the infrastructure  
13 and capacity within hospitals to establish and support ASPs, and the policy framework to  
14 provide formal leadership and governance will be critical as these were identified to be  
15 deficient in the surveyed hospitals.  
16  
17  
18  
19  
20  
21  
22  
23  
24  
25  
26

27 In this study, there was also a substantial difference in the prevalence of antibiotics use  
28 across different levels of surveyed hospitals where a statistically significant higher  
29 antibiotic use was reported in tertiary care hospitals. There were also disparities with  
30 respect to the type of prescribed antibiotics compared to other studies. Similar to the study  
31 done in Pakistan [26] and Ethiopia, the most widely prescribed antibiotic in this study was  
32 the 3<sup>rd</sup> generation cephalosporin, ceftriaxone (30.4%). In developed countries, the most  
33 commonly prescribed antibiotics were penicillins with  $\beta$ -lactamase inhibitors[23,31].  
34 Nitroimidazole was the most commonly prescribed antibiotic in Nigeria [8].  
35  
36  
37  
38  
39  
40  
41

42 Prolonged use of surgical prophylaxis (>24hours) in this study was high (82.6%), similar to  
43 studies from other LMICs (73% to 100%) [24,26,27,34–36]. The recommended duration of  
44 surgical prophylaxis is one day [37–39] since prolonging duration potentially increases  
45 rate of AMR, side effects, and costs for both the patient and the hospital [40–42].  
46 Furthermore, average number of antibiotics prescribed per patient for surgical prophylaxis  
47 was 1.32 despite several studies and guidelines demonstrating the cost-effectiveness of  
48 single narrow-spectrum antibiotics, usually cefazolin [30,37,43–46]. However, in the  
49 current study, ceftriaxone (54.7%) was the widely prescribed antibiotic. The widespread  
50 use of broad-spectrum 3<sup>rd</sup> generation cephalosporin's in our survey might be due to  
51  
52  
53  
54  
55  
56  
57

1  
2  
3 unavailability of cefazolin in all of the surveyed hospitals. Hence, due to proven safety and  
4 efficacy of Cefazolin, it's time for Ethiopia to include it on the essential medicine list, ensure  
5 its availability, develop guidelines and enforce use of cefazolin or other narrow-spectrum  
6 antibiotics for surgical prophylaxis.  
7  
8  
9  
10  
11  
12  
13  
14  
15  
16  
17  
18  
19  
20  
21  
22  
23  
24  
25  
26  
27  
28  
29  
30  
31  
32  
33  
34  
35  
36  
37  
38  
39  
40  
41  
42  
43  
44  
45  
46  
47  
48  
49  
50  
51  
52  
53  
54  
55  
56  
57

For peer review only

## Conclusion

Similar to studies from other LMICs, there was widespread use of antibiotics and a high burden of HCAs. Moreover, prolonged use of broad-spectrum antibiotics was common practice for surgical prophylaxis suggesting an important target for ASP intervention. Almost all treatments were empiric and hospitals should be further stimulated to regularly monitor antibiotic use and set local targets to optimize their use.

## Abbreviations

**AMR:** Antimicrobial resistance; **ASP:** Antimicrobial stewardship program; **CAIs:** Community acquired infections; **HCAIs:** Healthcare associated infections; **HICs:** High income countries; **LMICs:** Low- and middle-income countries; **PPS:** Point prevalence survey

## Authors' contributions

AMF prepared the draft manuscript. All authors made substantial contributions to conception and design, acquisition of data, or analysis and interpretation of data; took part in drafting the manuscript or revising it critically for important intellectual content; gave final approval of the manuscript in its currently submitted form; and agree to be accountable for all aspects of the work.

## Funding

This multicenter PPS of antibiotic use and HCAs in selected hospitals was commissioned by the Ethiopian Federal Ministry of Health (EFMOH) with the financial and technical assistance of the WHO.

## Ethical Considerations

Ethical clearance was obtained from the Ethiopian Federal Ministry of Health. Before data collection, permission was sought from respective hospital administration. Collected data were de-identified during data collection and data were analyzed in aggregate to maintain confidentiality and anonymity of information.

1  
2  
3 **Competing interests:** None  
4

5  
6 **Patient consent for publication**  
7

8 Not required  
9

10  
11 **Data availability statement**  
12

13 All data relevant to the study are included in the article or uploaded as supplementary  
14 information.  
15

16  
17 **Acknowledgments**  
18

19  
20 We extend our gratitude for the valuable support of the the 10 Hospitals. The PPS protocol  
21 adopted from the WHO methodology for PPS on antibiotic use in hospitals for LMICs. Last  
22 but not least would like to extend our appreciation to the data collectors assigned from the  
23 hospitals as well as to all validation workshop participants for their valuable comments  
24 and feedback.  
25  
26  
27  
28  
29  
30  
31  
32  
33  
34  
35  
36  
37  
38  
39  
40  
41  
42  
43  
44  
45  
46  
47  
48  
49  
50  
51  
52  
53  
54  
55  
56  
57



## References

- 1 Kardos N, Demain AL. Penicillin: The medicine with the greatest impact on therapeutic outcomes. *Appl. Microbiol. Biotechnol.* 2011. doi:10.1007/s00253-011-3587-6
- 2 Lobanovska M, Pilla G. Penicillin's Discovery and Antibiotic Resistance: Lessons for the Future? *Yale J Biol Med.* 2017 Mar 29;90(1):135-145. PMID: 28356901; PMCID: PMC5369031.
- 3 O'Neill J. *Antimicrobial Resistance : Tackling a crisis for the health and wealth of nations.* 2016.
- 4 The World Bank. Drug-resistant infections: A Threat to Our Economic Future. *World Bank Rep* 2017.
- 5 Michael CA, Dominey-Howes D, Labbate M. The antimicrobial resistance crisis: causes, consequences, and management. *Front Public Health.* 2014 Sep 16;2:145. doi: 10.3389/fpubh.2014.00145. PMID: 25279369; PMCID: PMC4165128.
- 6 World Health Organization. Global Action Plan on Antimicrobial Resistance. *Microbe Mag* 2015;10:354–5. doi:10.1128/microbe.10.354.1
- 7 Centers for Disease Control and Prevention. Antibiotic Use in the United States, 2017. Progress and Opportunities Atlanta, GA: US Department of Health and Human Services, CDC; 2017. *J Antimicrob Chemother* 2017;;1–9. <https://www.cdc.gov/antibiotic-use/stewardship-report/pdf/stewardship-report.pdf>
- 8 Abubakar U. Point-prevalence survey of hospital acquired infections in three acute care hospitals in Northern Nigeria. *Antimicrob Resist Infect Control* 2020;9:1–7. doi:10.1186/s13756-020-00722-9
- 9 Ayukekbong JA, Ntemgwa M, Atabe AN. The threat of antimicrobial resistance in developing countries: Causes and control strategies. *Antimicrob Resist Infect Control*

- 2017;**6**:1–8. doi:10.1186/s13756-017-0208-x
- 10 Mboya EA, Sanga LA, Ngocho JS. Irrational use of antibiotics in the moshi  
municipality Northern Tanzania: A cross sectional study. *Pan Afr Med J* 2018;**31**:1–10.  
doi:10.11604/pamj.2018.31.165.15991
- 11 World Health Organization. WHO Methodology for Point Prevalence Survey on  
Antibiotics Use in Hospitals. 2018;**Version 1**.
- 12 Alemkere G, Tenna A, Engidawork E. Antibiotic use practice and predictors of  
hospital outcome among patients with systemic bacterial infection: Identifying  
targets for antibiotic and health care resource stewardship. *PLoS One* Published  
Online First: 2019. doi:10.1371/journal.pone.0212661
- 13 Gebretekle GB, Haile Mariam D, Abebe Taye W, *et al*. Half of Prescribed Antibiotics  
Are Not Needed: A Pharmacist-Led Antimicrobial Stewardship Intervention and  
Clinical Outcomes in a Referral Hospital in Ethiopia. *Front Public Heal* Published  
Online First: 2020. doi:10.3389/fpubh.2020.00109
- 14 Argaw, N.A., Shumbash, K.Z., Asfaw, A.A. *et al*. Assessment of surgical antimicrobial  
prophylaxis in Orthopaedics and Traumatology Surgical Unit of a Tertiary Care  
Teaching Hospital in Addis Ababa. *BMC Res Notes* **10**, 160 (2017).  
<https://doi.org/10.1186/s13104-017-2475-2>
- 15 Abebe W, Alemayehu T, Kong L, *et al*. Alarming rates of drug-resistant Gram-negative  
bloodstream infections among hospitalized patients in Ethiopia : an urgent call to  
strengthen diagnostic bacteriology and antimicrobia ... *28th Eur Congr Clin Microbiol  
Infect Dis* 2018.
- 16 Alemayehu, T., Ali, M., Mitiku, E. *et al*. The burden of antimicrobial resistance at  
tertiary care hospital, southern Ethiopia: a three years' retrospective study. *BMC  
Infect Dis* **19**, 585 (2019). <https://doi.org/10.1186/s12879-019-4210-1>.
- 17 Mouiche, M.M.M., Moffo, F., Akoachere, JF.T.K. *et al*. Antimicrobial resistance from a  
one health perspective in Cameroon: a systematic review and meta-analysis. *BMC*

- 1  
2  
3 *Public Health* **19**, 1135 (2019). <https://doi.org/10.1186/s12889-019-7450-5>  
4  
5  
6 18 Nellums LB, Thompson H, Holmes A, *et al.* Antimicrobial resistance among migrants  
7 in Europe: a systematic review and meta-analysis. *Lancet Infect Dis* 2018;**18**:796–  
8 811. doi:10.1016/S1473-3099(18)30219-6  
9  
10  
11  
12 19 Aminov RI. A brief history of the antibiotic era: lessons learned and challenges for the  
13 future. *Front Microbiol.* 2010 Dec 8;1:134. doi: 10.3389/fmicb.2010.00134. PMID:  
14 21687759; PMCID: PMC3109405.  
15  
16  
17  
18 20 Midega J. Estimating the global burden of antimicrobial resistance: Reflections on  
19 current methods and data needs. *Wellcome Open Res* 2020;**5**:48.  
20 doi:10.12688/wellcomeopenres.15680.1  
21  
22  
23  
24 21 Muhie OA. Antibiotic Use and Resistance Pattern in Ethiopia: Systematic Review and  
25 Meta-Analysis. *Int J Microbiol.* 2019; 2019: 2489063. doi: 10.1155/2019/2489063  
26  
27  
28 22 Ibrahim RA, Teshale AM, Dinku SF, *et al.* Erratum: Antimicrobial resistance  
29 surveillance in Ethiopia: Implementation experiences and lessons learned. *Afr J Lab*  
30 *Med* 2019;**8**:1–4. doi:10.4102/ajlm.v7i2.770  
31  
32  
33  
34 23 Frenette C, Sperlea D, German GJ, *et al.* The 2017 global point prevalence survey of  
35 antimicrobial consumption and resistance in Canadian hospitals. *Antimicrob Resist*  
36 *Infect Control*: 2020. doi:10.1186/s13756-020-00758-x  
37  
38  
39  
40 24 Anand Paramadhas BD, Tiroyakgosi C, Mpinda-Joseph P, *et al.* Point prevalence study  
41 of antimicrobial use among hospitals across Botswana; findings and implications.  
42 *Expert Rev Anti Infect Ther* 2019;**17**:535–46. doi:10.1080/14787210.2019.1629288  
43  
44  
45  
46 25 Gutema G, Håkonsen H, Engidawork E, *et al.* Multiple challenges of antibiotic use in a  
47 large hospital in Ethiopia - A ward-specific study showing high rates of hospital-  
48 acquired infections and ineffective prophylaxis. *BMC Health Serv Res*: 2018.  
49 doi:10.1186/s12913-018-3107-9  
50  
51  
52  
53  
54 26 Saleem Z, Saeed H, Hassali MA, *et al.* Pattern of inappropriate antibiotic use among  
55  
56  
57

- 1  
2  
3 hospitalized patients in Pakistan: A longitudinal surveillance and implications.  
4 *Antimicrob Resist Infect Control*: 2019. doi:10.1186/s13756-019-0649-5  
5  
6  
7  
8 27 Abubakar U. Antibiotic use among hospitalized patients in northern Nigeria: A  
9 multicenter point-prevalence survey. *BMC Infect Dis* 2020;**20**:1–9.  
10 doi:10.1186/s12879-020-4815-4  
11  
12  
13 28 Ciofi Degli Atti ML, D'Amore C, Ceradini J, *et al*. Prevalence of antibiotic use in a  
14 tertiary care hospital in Italy, 2008-2016. *Ital J Pediatr*: 2019. doi:10.1186/s13052-  
15 019-0645-7  
16  
17  
18  
19 29 Sorensen H. Trends in U. S. Antibiotic Use. *Pew Charit Trust* 2018;:1–9.  
20  
21  
22 30 Vandael E, Latour K, Goossens H, *et al*. Point prevalence survey of antimicrobial use  
23 and healthcare-associated infections in Belgian acute care hospitals: Results of the  
24 Global-PPS and ECDC-PPS 2017. *Antimicrob Resist Infect Control* 2020;**9**:1–13.  
25 doi:10.1186/s13756-019-0663-7  
26  
27  
28  
29 31 Versporten A, Zarb P, Caniaux I, *et al*. Antimicrobial consumption and resistance in  
30 adult hospital inpatients in 53 countries: results of an internet-based global point  
31 prevalence survey. *Lancet Glob Heal*: 2018. doi:10.1016/S2214-109X(18)30186-4  
32  
33  
34  
35 32 Versporten A, Zarb P, Caniaux I, *et al*. Antimicrobial consumption and resistance in  
36 adult hospital inpatients in 53 countries: results of an internet-based global point  
37 prevalence survey. *Lancet Glob Heal*: 2018;**6**:e619–29. doi:10.1016/S2214-  
38 109X(18)30186-4  
39  
40  
41  
42  
43 44 de With K, Allerberger F, Amann S, *et al*. Strategies to enhance rational use of  
45 antibiotics in hospital: a guideline by the German Society for Infectious Diseases.  
46 *Infection*: 2016;**44**:395–439. doi:10.1007/s15010-016-0885-z  
47  
48  
49  
50 51 34 Afriyie DK, Sefah IA, Sneddon J, *et al*. Antimicrobial point prevalence surveys in two  
52 Ghanaian hospitals: opportunities for antimicrobial stewardship. *JAC-Antimicrobial*  
53 *Resist*: 2020;**2**:1–9. doi:10.1093/jacamr/dlaa001  
54  
55  
56  
57

- 1  
2  
3 35 Horumpende PG, Mshana SE, Mouw EF, *et al.* Point prevalence survey of  
4 antimicrobial use in three hospitals in North-Eastern Tanzania. *Antimicrob Resist*  
5 *Infect Control*: 2020;**9**:1–6. doi:10.1186/s13756-020-00809-3  
6  
7  
8  
9 36 Van Der Sandt N, Schellack N, Mabope LA, *et al.* Surgical antimicrobial prophylaxis  
10 among pediatric patients in south africa comparing two healthcare settings. *Pediatr*  
11 *Infect Dis J*: 2019. doi:10.1097/INF.0000000000002072  
12  
13  
14  
15 37 Berriós-Torres SI, Umscheid CA, Bratzler DW, *et al.* Centers for disease control and  
16 prevention guideline for the prevention of surgical site infection. *JAMA Surg*. 2017.  
17 doi:10.1001/jamasurg.2017.0904  
18  
19  
20  
21 38 Bratzler DW, Dellinger EP, Olsen KM, *et al.* Clinical practice guidelines for  
22 antimicrobial prophylaxis in surgery. *Surg Infect (Larchmt)*: 2013;**14**:73–156.  
23 doi:10.1089/sur.2013.9999  
24  
25  
26  
27 39 Jocum J. Surgical antibiotic prophylaxis: Are you doing it right? *South African J*  
28 *Anaesth Analg*: 2018;**24**:S49–53.  
29  
30  
31  
32 40 Roberts SA, Morris AJ. Surgical antibiotic prophylaxis: more is not better. *Lancet*  
33 *Infect Dis*: 2020;**20**:1110–1. doi:10.1016/S1473-3099(20)30290-5  
34  
35  
36 41 Bratzler DW, Dellinger EP, Olsen KM, *et al.* Balancing the Risks and Benefits of  
37 Surgical Prophylaxis Timing and Duration Do Matter. *Am J Heal Pharm*:  
38 2013;**70**:195–283. doi:10.2146/ajhp120568  
39  
40  
41  
42 42 Branch-Elliman W, O'Brien W, Strymish J, *et al.* Association of Duration and Type of  
43 Surgical Prophylaxis with Antimicrobial-Associated Adverse Events. In: *JAMA Surgery*:  
44 2019. doi:10.1001/jamasurg.2019.0569  
45  
46  
47  
48 43 Pinto-Lopes R, Sousa-Pinto B, Azevedo LF. Single dose versus multiple dose of  
49 antibiotic prophylaxis in caesarean section: a systematic review and meta-analysis.  
50 *BJOG An Int. J. Obstet. Gynaecol*: 2017; 124(4): doi:10.1111/1471-0528.14373  
51  
52  
53  
54 44 Slobogean GP, Kennedy SA, Davidson D, O'Brien PJ. Single- versus multiple-dose  
55  
56  
57

1  
2  
3 antibiotic prophylaxis in the surgical treatment of closed fractures: a meta-analysis. J  
4 Orthop Trauma. 2008 Apr;22(4):264-9. doi: 10.1097/BOT.0b013e31816b7880.  
5  
6 PMID: 18404036.  
7

8  
9 45 Ierano C, Nankervis JM, James R, Rajkhowa A, Peel T, Thursky K. Surgical  
10 antimicrobial prophylaxis. *Aust Prescr*. 2017;40(6):225-229.  
11  
12 doi:10.18773/austprescr.2017.073  
13

14  
15 46 Bratzler DW, Dellinger EP, Olsen KM, et al. Clinical practice guidelines for  
16 antimicrobial prophylaxis in surgery. *Surg Infect (Larchmt)*. 2013 Feb;14(1):73-156.  
17  
18 doi: 10.1089/sur.2013.9999. Epub 2013 Mar 5. PMID: 23461695.  
19  
20  
21  
22  
23  
24  
25  
26  
27  
28  
29  
30  
31  
32  
33  
34  
35  
36  
37  
38  
39  
40  
41  
42  
43  
44  
45  
46  
47  
48  
49  
50  
51  
52  
53  
54  
55  
56  
57

1  
2  
3  
4  
5  
6  
7  
8  
9  
10  
11  
12  
13  
14  
15  
16  
17  
18  
19  
20  
21  
22  
23  
24  
25  
26  
27  
28  
29  
30  
31  
32  
33  
34  
35  
36  
37  
38  
39  
40  
41

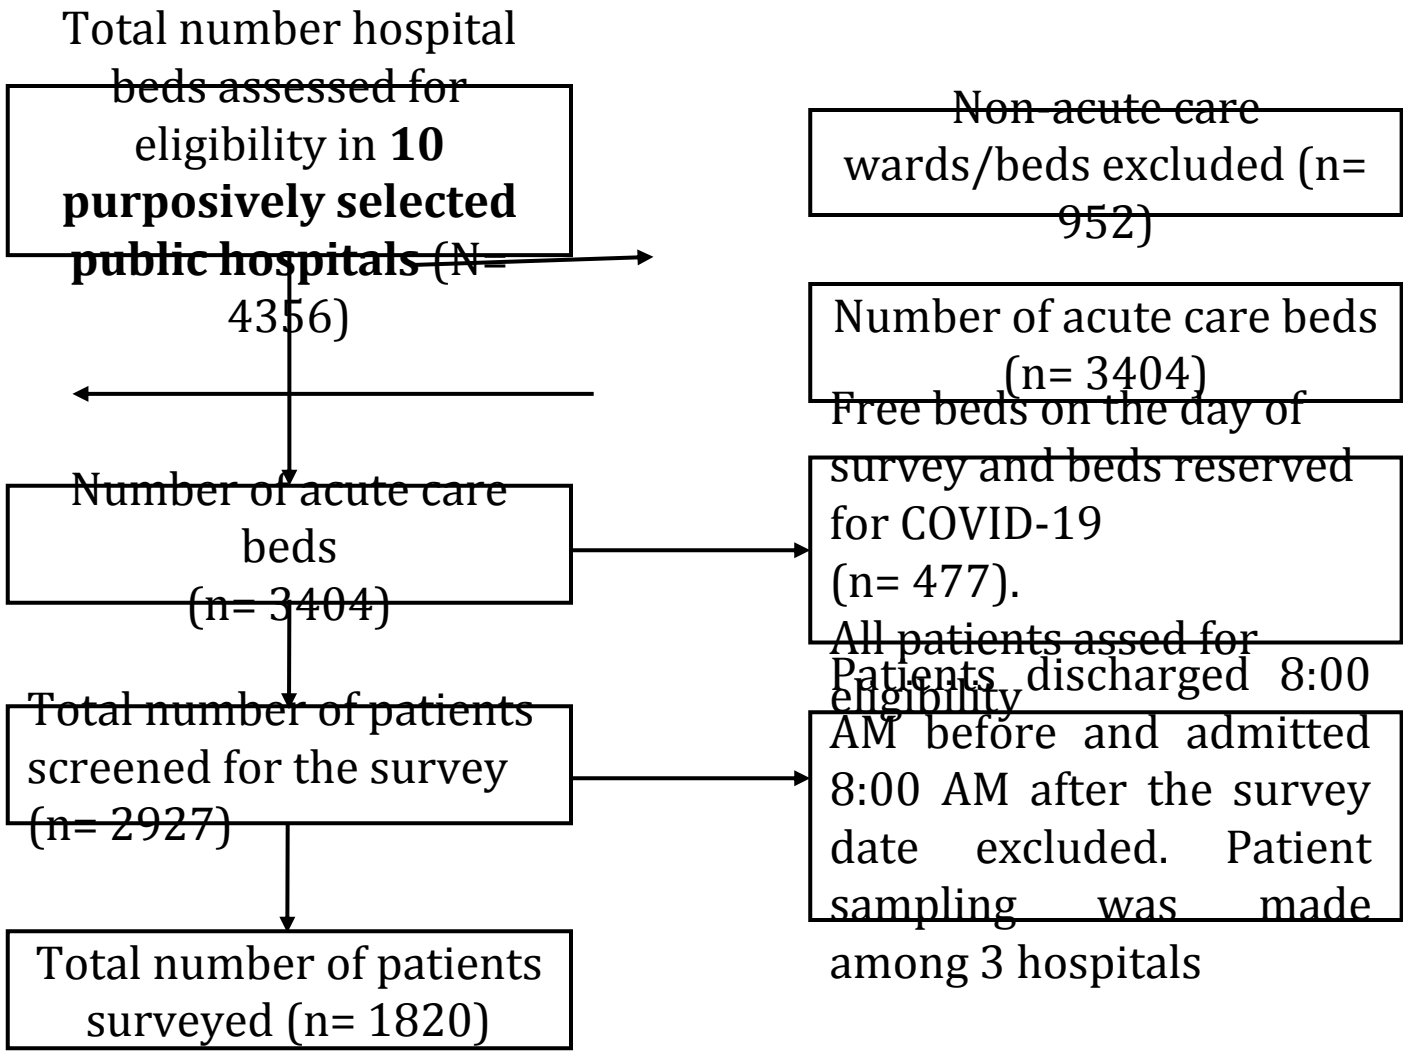

1  
2  
3 **Supplementary file**  
4

5 **Ethiopia's profile**  
6

7  
8  
9  
10  
11  
12  
13  
14  
15  
16  
17  
18  
19  
20  
21  
22  
23  
24  
25  
26  
27  
28  
29  
30  
31  
32  
33  
34  
35  
36  
37  
38  
39  
40  
41  
42  
43  
44  
45  
46  
47  
48  
49  
50  
51  
52  
53  
54  
55  
56  
57  
58  
59  
60

| S.N | Variable                                                                                                    | Response             |
|-----|-------------------------------------------------------------------------------------------------------------|----------------------|
| 1.  | ISO code of Ethiopia                                                                                        | ETH                  |
| 2.  | Total number of hospitals at any level (tertiary, secondary, primary and specialized) in the country.       | 439                  |
| 3.  | Number of public hospitals in the country.                                                                  | 353                  |
| 4.  | Estimated number of private hospitals in the country                                                        | 86                   |
| 5.  | Estimated number of tertiary level (university teaching and specialized hospital) hospitals in the country. | 25                   |
| 6.  | Number of secondary level (General) hospitals in the country.                                               | 58                   |
| 7.  | Estimated number of primary hospitals in the country.                                                       | 381                  |
| 8.  | Is Hospital grouping exist in the country                                                                   | No                   |
| 9.  | Hospital survey sampling strategy                                                                           | Convenience sampling |
| 10. | Number of hospitals for the survey                                                                          | <b>10</b>            |
| 11. | Does a national treatment guideline exist?                                                                  | Yes                  |
| 12. | Does facility-based treatment guidelines exist                                                              | No                   |
| 13. | Does a national hospital ASP exists                                                                         | Yes                  |



### The 10 surveyed hospitals profile

| S.N | Variable                                                                                  | Mean $\pm$ SD     | Median(Range)        |
|-----|-------------------------------------------------------------------------------------------|-------------------|----------------------|
| 1.  | Number of beds in the surveyed hospitals                                                  | 443 $\pm$ 164     | 410(223-700)         |
| 2.  | Number of acute care beds                                                                 | 349 $\pm$ 134     | 314(186-600)         |
| 3.  | Number of ICU beds                                                                        | 34 $\pm$ 24       | 32(6-82)             |
| 4.  | Number of high risk beds                                                                  | 22 $\pm$ 19       | 18(0-51)             |
| 5.  | Annual overall admissions in the hospitals in the previous physical year, i.e. 2012 E.C.# | 16471 $\pm$ 7405  | 13885 (7025-30456)   |
| 6.  | Overall patient days in the hospitals for the previous physical year i.e. 2012 E.C.*      | 94679 $\pm$ 45583 | 79254(48931-176,742) |
| 7.  | Average length of hospital stay in days                                                   | 6.53 $\pm$ 1.48   | 6.0(4.8-10.2)        |
| 8.  | Sum of the number of beds of the wards included in the survey (Total= 2927 beds)          | 293 $\pm$ 153     | 214(103-541)         |
| 9.  | Number of patients eligible for inclusion in the survey. (Total= 2209 patients)           | 240 $\pm$ 115     | 203(103-474)         |
| 10. | Number of patients included in the survey (Total= 1820).                                  | 182 $\pm$ 61      | 161(103-325)         |

#emergency admission over 24 hours was not included. \* **Patient days:** over all admission \* average length of hospital stay.

### Existing surveyed hospitals capacity to promote rational use of antibiotics

| Variable                                                                                                      | Yes, N(%) |
|---------------------------------------------------------------------------------------------------------------|-----------|
| <b>Hospital infrastructure</b>                                                                                |           |
| Functioning Drugs and Therapeutics Committee                                                                  | 8(80.0)   |
| Functioning Infection Prevention & Control Committee                                                          | 10(100.0) |
| Microbiological laboratory service                                                                            | 8(80.0)   |
| Availability of a formal organizational structure responsible for ASP                                         | 10(100.0) |
| A physician ASP leader                                                                                        | 10(100.0) |
| Availability of a ASP team                                                                                    | 7(70.0)   |
| Availability of functional ASP in the hospital                                                                | 0(0.0)    |
| Availability of pharmacist responsible for ensuring appropriate antibiotic use                                | 9(90.0)   |
| Incentive package for dedicated staff for ASP                                                                 | 0(0.0)    |
| IT support for ASP                                                                                            | 0(0.0)    |
| Availability of outpatient parenteral antibiotic therapy (OPAT) unit                                          | 0(0.0)    |
| <b>Policy and practice</b>                                                                                    |           |
| Availability of antibiotic formulary (including unrestricted and restricted antibiotics) updated continuously | 0(0.0)    |
| Antibiotic formulary based on the Essential Drug List                                                         | 0(0.0)    |
| Institutional antibiotic guideline                                                                            | 3(30.0)   |
| Institutional antibiotic guidelines based on local Antibiogram                                                | 1(10.0)   |

|    |                                                                                             |                                                                                                                                                                                                                                                                                  |                |
|----|---------------------------------------------------------------------------------------------|----------------------------------------------------------------------------------------------------------------------------------------------------------------------------------------------------------------------------------------------------------------------------------|----------------|
| 1  |                                                                                             |                                                                                                                                                                                                                                                                                  |                |
| 2  |                                                                                             |                                                                                                                                                                                                                                                                                  |                |
| 3  | A written policy that requires prescribers to document an indication in the medical records |                                                                                                                                                                                                                                                                                  | 2(20.0)        |
| 4  |                                                                                             |                                                                                                                                                                                                                                                                                  |                |
| 5  | Preauthorization policy                                                                     |                                                                                                                                                                                                                                                                                  | 1(10.0)        |
| 6  |                                                                                             |                                                                                                                                                                                                                                                                                  |                |
| 7  | Post-prescription review service                                                            |                                                                                                                                                                                                                                                                                  | 7(70.0)        |
| 8  |                                                                                             |                                                                                                                                                                                                                                                                                  |                |
| 9  | <b>Monitoring and feedback</b>                                                              |                                                                                                                                                                                                                                                                                  |                |
| 10 |                                                                                             |                                                                                                                                                                                                                                                                                  |                |
| 11 | Monitoring of antibiotics indications on medical record                                     |                                                                                                                                                                                                                                                                                  | 5(50.0)        |
| 12 |                                                                                             |                                                                                                                                                                                                                                                                                  |                |
| 13 | Monitoring of surgical antibiotic prophylaxis choice and duration                           |                                                                                                                                                                                                                                                                                  | 2(20.0)        |
| 14 |                                                                                             |                                                                                                                                                                                                                                                                                  |                |
| 15 | Results of antibiotic audits are communicated directly with prescribers                     |                                                                                                                                                                                                                                                                                  | 7(70.0)        |
| 16 |                                                                                             |                                                                                                                                                                                                                                                                                  |                |
| 17 | Monitor of antibiotic use                                                                   |                                                                                                                                                                                                                                                                                  | 1(10.0)        |
| 18 |                                                                                             |                                                                                                                                                                                                                                                                                  |                |
| 19 | Monitoring of antibiotic use by DDD or DOT                                                  |                                                                                                                                                                                                                                                                                  | 0(0.0)         |
| 20 |                                                                                             |                                                                                                                                                                                                                                                                                  |                |
| 21 | Antibiotic use reported by hospital activity denominator                                    |                                                                                                                                                                                                                                                                                  | 0(0.0)         |
| 22 |                                                                                             |                                                                                                                                                                                                                                                                                  |                |
| 23 | Annual report focused on ASP in the past year                                               |                                                                                                                                                                                                                                                                                  | 2(20.0)        |
| 24 |                                                                                             |                                                                                                                                                                                                                                                                                  |                |
| 25 | A cumulative antibiotic susceptibility report in the past year                              |                                                                                                                                                                                                                                                                                  | 3(30.0)        |
| 26 |                                                                                             |                                                                                                                                                                                                                                                                                  |                |
| 27 | A national antibiotic resistance surveillance program participation                         |                                                                                                                                                                                                                                                                                  | 4(40.0)        |
| 28 |                                                                                             |                                                                                                                                                                                                                                                                                  |                |
| 29 | A national antibiotic use surveillance program participation                                |                                                                                                                                                                                                                                                                                  | 0(0.0)         |
| 30 |                                                                                             |                                                                                                                                                                                                                                                                                  |                |
| 31 | Number of blood cultures done in the past year, N= 7- hospitals                             | Mean ± SD                                                                                                                                                                                                                                                                        | 2625 ± 3307    |
| 32 |                                                                                             | Median(Range)                                                                                                                                                                                                                                                                    | 1707(452-9860) |
| 33 |                                                                                             |                                                                                                                                                                                                                                                                                  |                |
| 34 |                                                                                             |                                                                                                                                                                                                                                                                                  |                |
| 35 | List of antibiotics out of stock at the facility during the survey period.                  | Cefepime 1g, Meropenam 1g and 0.5g, Piperacillin-Tazobactam 4.5g, Ciprofloxacin 0.4mg , ceftazidime 1gm, Metronidazole 0.5g and Gentamycin 80mg injections were stock out in all of the surveyed hospitals. Vancomycin 1g and 0.5g was also stock out at two surveyed hospitals. |                |
| 36 |                                                                                             |                                                                                                                                                                                                                                                                                  |                |
| 37 |                                                                                             |                                                                                                                                                                                                                                                                                  |                |
| 38 |                                                                                             |                                                                                                                                                                                                                                                                                  |                |
| 39 |                                                                                             |                                                                                                                                                                                                                                                                                  |                |
| 40 |                                                                                             |                                                                                                                                                                                                                                                                                  |                |
| 41 |                                                                                             |                                                                                                                                                                                                                                                                                  |                |
| 42 |                                                                                             |                                                                                                                                                                                                                                                                                  |                |
| 43 |                                                                                             |                                                                                                                                                                                                                                                                                  |                |
| 44 |                                                                                             |                                                                                                                                                                                                                                                                                  |                |
| 45 |                                                                                             |                                                                                                                                                                                                                                                                                  |                |
| 46 |                                                                                             |                                                                                                                                                                                                                                                                                  |                |
| 47 |                                                                                             |                                                                                                                                                                                                                                                                                  |                |

## Antibiotics prescription and indication

| Variable                                                                                                                           | Number | Percentage |
|------------------------------------------------------------------------------------------------------------------------------------|--------|------------|
| <b>Total number of antibiotics prescribed since admission</b>                                                                      | 3192   |            |
| <b>Number of antibiotics prescribed/ patient since admission: N= 1410 patients</b>                                                 |        |            |
| 1                                                                                                                                  | 379    | 26.9       |
| 2                                                                                                                                  | 632    | 44.8       |
| 3                                                                                                                                  | 203    | 14.3       |
| 4                                                                                                                                  | 117    | 8.3        |
| 5                                                                                                                                  | 42     | 3.0        |
| 6                                                                                                                                  | 19     | 1.3        |
| Others*                                                                                                                            | 18     | 1.2        |
| <b>Overall antibiotics prescribed on the day of survey</b>                                                                         | 2058   |            |
| <b>Number of antibiotics given/patient at a time of survey: N= 1162 patients</b>                                                   |        |            |
| 1                                                                                                                                  | 432    | 37.1       |
| 2                                                                                                                                  | 585    | 50.4       |
| 3                                                                                                                                  | 124    | 10.7       |
| 4                                                                                                                                  | 18     | 1.6        |
| 5                                                                                                                                  | 3      | 0.3        |
| <b>Route of administration: N= 2059 antibiotics</b>                                                                                |        |            |
| Oral                                                                                                                               | 201    | 9.8        |
| Parenteral                                                                                                                         | 1858   | 90.2       |
| <b>Antibiotics prescription note: N= 2059 antibiotics</b>                                                                          |        |            |
| Brand                                                                                                                              | 61     | 2.9        |
| Generic                                                                                                                            | 1998   | 97.1       |
| <b>Indication of antibiotics written on patient notes: N= 1162 patients</b>                                                        |        |            |
| No                                                                                                                                 | 51     | 4.4        |
| Yes                                                                                                                                | 1111   | 95.6       |
| <b>Antibiotics duration in days ( From time of initiation to survey date): Mean <math>\pm</math> SD: 7.72 <math>\pm</math> 7.9</b> |        |            |
| <b>Type of treatment**, N=866 patients</b>                                                                                         |        |            |
| Empiric                                                                                                                            | 837    | 96.7       |
| Definitive                                                                                                                         | 29     | 3.3        |
| <b>Guideline compliance</b>                                                                                                        |        |            |
| Yes                                                                                                                                | 637    | 54.8       |
| No                                                                                                                                 | 255    | 21.9       |
| Not assessable                                                                                                                     | 237    | 20.4       |
| No information                                                                                                                     | 33     | 2.8        |
| <b>Prescriber type</b>                                                                                                             |        |            |
| General practitioner                                                                                                               | 178    | 15.3       |
| Resident                                                                                                                           | 949    | 81.7       |
| Specialist                                                                                                                         | 35     | 3.0        |

**\*Others:** 7 antibiotics= 5 patients; 8 antibiotics=8 patients; 9 antibiotics=3 patients; 10 antibiotics= 1 patient; 12 antibiotics=1 patient; \*\*Is only for patients whose antibiotics indication is for HCAs and CAs

**STROBE 2007 (v4) Statement—Checklist of items that should be included in reports of *cross-sectional studies***

| Section/Topic                | Item # | Recommendation                                                                                                                                                                       | Reported on page #    |
|------------------------------|--------|--------------------------------------------------------------------------------------------------------------------------------------------------------------------------------------|-----------------------|
| <b>Title and abstract</b>    | 1      | (a) Indicate the study's design with a commonly used term in the title or the abstract                                                                                               | 1                     |
|                              |        | (b) Provide in the abstract an informative and balanced summary of what was done and what was found                                                                                  | 2                     |
| <b>Introduction</b>          |        |                                                                                                                                                                                      |                       |
| Background/rationale         | 2      | Explain the scientific background and rationale for the investigation being reported                                                                                                 | 3-4                   |
| Objectives                   | 3      | State specific objectives, including any prespecified hypotheses                                                                                                                     | Last paragraph on 3/4 |
| <b>Methods</b>               |        |                                                                                                                                                                                      |                       |
| Study design                 | 4      | Present key elements of study design early in the paper                                                                                                                              | 5                     |
| Setting                      | 5      | Describe the setting, locations, and relevant dates, including periods of recruitment, exposure, follow-up, and data collection                                                      | 5                     |
| Participants                 | 6      | (a) Give the eligibility criteria, and the sources and methods of selection of participants                                                                                          | 5                     |
| Variables                    | 7      | Clearly define all outcomes, exposures, predictors, potential confounders, and effect modifiers. Give diagnostic criteria, if applicable                                             | 5                     |
| Data sources/<br>measurement | 8*     | For each variable of interest, give sources of data and details of methods of assessment (measurement). Describe comparability of assessment methods if there is more than one group | NA                    |
| Bias                         | 9      | Describe any efforts to address potential sources of bias                                                                                                                            | 6                     |
| Study size                   | 10     | Explain how the study size was arrived at                                                                                                                                            | 6                     |
| Quantitative variables       | 11     | Explain how quantitative variables were handled in the analyses. If applicable, describe which groupings were chosen and why                                                         | 6                     |
| Statistical methods          | 12     | (a) Describe all statistical methods, including those used to control for confounding                                                                                                | 6                     |
|                              |        | (b) Describe any methods used to examine subgroups and interactions                                                                                                                  | 6                     |
|                              |        | (c) Explain how missing data were addressed                                                                                                                                          | 6                     |
|                              |        | (d) If applicable, describe analytical methods taking account of sampling strategy                                                                                                   | 6                     |
|                              |        | (e) Describe any sensitivity analyses                                                                                                                                                | 6                     |
| <b>Results</b>               |        |                                                                                                                                                                                      |                       |

|                          |     |                                                                                                                                                                                                              |           |
|--------------------------|-----|--------------------------------------------------------------------------------------------------------------------------------------------------------------------------------------------------------------|-----------|
| Participants             | 13* | (a) Report numbers of individuals at each stage of study—eg numbers potentially eligible, examined for eligibility, confirmed eligible, included in the study, completing follow-up, and analysed            |           |
|                          |     | (b) Give reasons for non-participation at each stage                                                                                                                                                         | NA        |
|                          |     | (c) Consider use of a flow diagram                                                                                                                                                                           | 6         |
| Descriptive data         | 14* | (a) Give characteristics of study participants (eg demographic, clinical, social) and information on exposures and potential confounders                                                                     | 7-8       |
|                          |     | (b) Indicate number of participants with missing data for each variable of interest                                                                                                                          | 7-8       |
| Outcome data             | 15* | Report numbers of outcome events or summary measures                                                                                                                                                         | 10 and 14 |
| Main results             | 16  | (a) Give unadjusted estimates and, if applicable, confounder-adjusted estimates and their precision (eg, 95% confidence interval). Make clear which confounders were adjusted for and why they were included | 10        |
|                          |     | (b) Report category boundaries when continuous variables were categorized                                                                                                                                    | 15-17     |
|                          |     | (c) If relevant, consider translating estimates of relative risk into absolute risk for a meaningful time period                                                                                             | NA        |
| Other analyses           | 17  | Report other analyses done—eg analyses of subgroups and interactions, and sensitivity analyses                                                                                                               | NA        |
| <b>Discussion</b>        |     |                                                                                                                                                                                                              |           |
| Key results              | 18  | Summarise key results with reference to study objectives                                                                                                                                                     | 18-20     |
| Limitations              | 19  | Discuss limitations of the study, taking into account sources of potential bias or imprecision. Discuss both direction and magnitude of any potential bias                                                   | 21        |
| Interpretation           | 20  | Give a cautious overall interpretation of results considering objectives, limitations, multiplicity of analyses, results from similar studies, and other relevant evidence                                   | 21        |
| Generalisability         | 21  | Discuss the generalisability (external validity) of the study results                                                                                                                                        | 21        |
| <b>Other information</b> |     |                                                                                                                                                                                                              |           |
| Funding                  | 22  | Give the source of funding and the role of the funders for the present study and, if applicable, for the original study on which the present article is based                                                | 22        |

\*Give information separately for cases and controls in case-control studies and, if applicable, for exposed and unexposed groups in cohort and cross-sectional studies.

**Note:** An Explanation and Elaboration article discusses each checklist item and gives methodological background and published examples of transparent reporting. The STROBE checklist is best used in conjunction with this article (freely available on the Web sites of PLoS Medicine at <http://www.plosmedicine.org/>, Annals of Internal Medicine at <http://www.annals.org/>, and Epidemiology at <http://www.epidem.com/>). Information on the STROBE Initiative is available at [www.strobe-statement.org](http://www.strobe-statement.org).

# BMJ Open

## A multicenter point prevalence survey of antibiotic use and healthcare-associated infections in Ethiopian hospitals

|                                 |                                                                                                                                                                                                                                                                                                                                                                                                                                                                                                                                                                                                                                                                                                                                                                                                                                                                                                                                                                                                                                                                            |
|---------------------------------|----------------------------------------------------------------------------------------------------------------------------------------------------------------------------------------------------------------------------------------------------------------------------------------------------------------------------------------------------------------------------------------------------------------------------------------------------------------------------------------------------------------------------------------------------------------------------------------------------------------------------------------------------------------------------------------------------------------------------------------------------------------------------------------------------------------------------------------------------------------------------------------------------------------------------------------------------------------------------------------------------------------------------------------------------------------------------|
| Journal:                        | <i>BMJ Open</i>                                                                                                                                                                                                                                                                                                                                                                                                                                                                                                                                                                                                                                                                                                                                                                                                                                                                                                                                                                                                                                                            |
| Manuscript ID                   | bmjopen-2021-054541.R1                                                                                                                                                                                                                                                                                                                                                                                                                                                                                                                                                                                                                                                                                                                                                                                                                                                                                                                                                                                                                                                     |
| Article Type:                   | Original research                                                                                                                                                                                                                                                                                                                                                                                                                                                                                                                                                                                                                                                                                                                                                                                                                                                                                                                                                                                                                                                          |
| Date Submitted by the Author:   | 16-Nov-2021                                                                                                                                                                                                                                                                                                                                                                                                                                                                                                                                                                                                                                                                                                                                                                                                                                                                                                                                                                                                                                                                |
| Complete List of Authors:       | Fentie, Atalay; Addis Ababa University College of Health Sciences, Pharmacology and Clinical Pharmacy; Addis Ababa University, School of Pharmacy<br>Degefaw, Yidnekachew; Ethiopia Ministry of Health, Pharmaceuticals and Medical Equipment Directorate, Ministry of Health, Ethiopia<br>Asfaw, Getachew; Ethiopia Ministry of Health, Pharmaceuticals and Medical Equipment Directorate, Ministry of Health, Ethiopia<br>Shewarega, Wendosen ; Ethiopia Ministry of Health, Pharmaceuticals and Medical Equipment Directorate, Ministry of Health, Ethiopia<br>Woldearegay, Mengistab ; World Health Organization Ethiopia Office, Addis Ababa, Ethiopia, World Health Organization Ethiopia Office, Addis Ababa, Ethiopia<br>Abebe, Ephrem; Purdue University College of Pharmacy, School of Medicine, Indiana University, Indianapolis, IN, USA<br>Gebretekle, Gebremedhin ; University of Toronto Institute of Health Policy Management and Evaluation, Toronto Health Economics and Technology Assessment (THETA) Collaborative, University Health Network, Canada. |
| <b>Primary Subject Heading</b>: | Infectious diseases                                                                                                                                                                                                                                                                                                                                                                                                                                                                                                                                                                                                                                                                                                                                                                                                                                                                                                                                                                                                                                                        |
| Secondary Subject Heading:      | Health services research, Health economics                                                                                                                                                                                                                                                                                                                                                                                                                                                                                                                                                                                                                                                                                                                                                                                                                                                                                                                                                                                                                                 |
| Keywords:                       | INFECTIOUS DISEASES, Public health < INFECTIOUS DISEASES, Health policy < HEALTH SERVICES ADMINISTRATION & MANAGEMENT, Quality in health care < HEALTH SERVICES ADMINISTRATION & MANAGEMENT                                                                                                                                                                                                                                                                                                                                                                                                                                                                                                                                                                                                                                                                                                                                                                                                                                                                                |
|                                 |                                                                                                                                                                                                                                                                                                                                                                                                                                                                                                                                                                                                                                                                                                                                                                                                                                                                                                                                                                                                                                                                            |

SCHOLARONE™  
Manuscripts

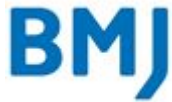

I, the Submitting Author has the right to grant and does grant on behalf of all authors of the Work (as defined in the below author licence), an exclusive licence and/or a non-exclusive licence for contributions from authors who are: i) UK Crown employees; ii) where BMJ has agreed a CC-BY licence shall apply, and/or iii) in accordance with the terms applicable for US Federal Government officers or employees acting as part of their official duties; on a worldwide, perpetual, irrevocable, royalty-free basis to BMJ Publishing Group Ltd ("BMJ") its licensees and where the relevant Journal is co-owned by BMJ to the co-owners of the Journal, to publish the Work in this journal and any other BMJ products and to exploit all rights, as set out in our [licence](#).

The Submitting Author accepts and understands that any supply made under these terms is made by BMJ to the Submitting Author unless you are acting as an employee on behalf of your employer or a postgraduate student of an affiliated institution which is paying any applicable article publishing charge ("APC") for Open Access articles. Where the Submitting Author wishes to make the Work available on an Open Access basis (and intends to pay the relevant APC), the terms of reuse of such Open Access shall be governed by a Creative Commons licence – details of these licences and which [Creative Commons](#) licence will apply to this Work are set out in our licence referred to above.

Other than as permitted in any relevant BMJ Author's Self Archiving Policies, I confirm this Work has not been accepted for publication elsewhere, is not being considered for publication elsewhere and does not duplicate material already published. I confirm all authors consent to publication of this Work and authorise the granting of this licence.



# A multicenter point prevalence survey of antibiotic use and healthcare associated infections in Ethiopian hospitals

Atalay Mulu Fentie<sup>1\*</sup>, Yidnekachew Degefaw<sup>2</sup>, Getachew Asfaw<sup>2</sup>, Wendosen Shewarega<sup>2</sup>, Mengistab Woldearegay<sup>3</sup>, Ephrem Abebe<sup>4,5†</sup>, Gebremedhin Beedemariam Gebretekle<sup>6,7†</sup>

†joint senior authors, \*Primary and corresponding author

<sup>1</sup>School of Pharmacy, College of Health Sciences, Addis Ababa University, Ethiopia.

<sup>2</sup>Pharmaceuticals and Medical Equipment Directorate, Ministry of Health, Ethiopia

<sup>3</sup>World Health Organization Ethiopia Office, Addis Ababa, Ethiopia.

<sup>4</sup>College of Pharmacy, Purdue University, West Lafayette, IN, USA

<sup>5</sup> School of Medicine, Indiana University, Indianapolis, IN, USA

<sup>6</sup>Institute of Health Policy, Management, and Evaluation, University of Toronto, Canada

<sup>7</sup>Toronto Health Economics and Technology Assessment (THETA) Collaborative, University Health Network, Canada.

## \*Correspondence author

Atalay Mulu Fentie

Clinical and Pharmacology Department, School of Pharmacy, College of Health Sciences, Addis Ababa University, Ethiopia.

P.O.Box: 1176

Telephone: +251923295462

Email: [atalay.mulu@aau.edu.et](mailto:atalay.mulu@aau.edu.et)

**Word Count (Abstract):** 299

**Word Count (manuscript text):** 3460

Tables: **05**

Figure: **01**

**Keywords:** Antimicrobial resistance, AMR, Antimicrobial stewardship, Antibiotic, Ethiopia, Healthcare associated infection, HCAI, Point prevalence survey

## Abstract

**Objective:** Effective antimicrobial containment strategies such as Antimicrobial Stewardship programs (ASP) require comprehensive data on antibiotics use which is scarce in Ethiopia. This study sought to assess antibiotics use and healthcare-associated infections (HCAIs) in Ethiopian public hospitals.

**Design:** We conducted a cross-sectional study using the WHO point-prevalence survey protocol for systemic antibiotics use and HCAIs for low- and middle-income countries (LMICs).

**Setting:** The study was conducted among 10 public-hospitals in 2021.

**Participants:** All patients admitted to adult and pediatrics inpatient and emergency wards at or on 8:00AM on the survey date were enrolled.

**Outcome measure:** The primary outcome measures were the proportion of antibiotic use, HCAIs, and the hospitals' readiness to implement ASP.

**Results:** Data were collected from 1820 patient records. None of the surveyed hospitals had functional ASP. The common indication for antibiotics was for HCAIs (40.3%). Pneumonia was the most common bacterial infection (28.6%) followed by clinical sepsis (17.8%). Most treatments were empiric (96.7%) and the overall prevalence of antibiotic use was 63.8% with antibiotics prescription per patient ratio of 1.77. Ceftriaxone was the most commonly prescribed antibiotic (30.4%) followed by metronidazole (15.4%). Age, having HIV infection, ward type, type of hospital, catheterization and intubation history had significant association with antibiotic use. Patients who were treated in pediatric surgical wards were about four times more likely to be on antibiotics compared to patients treated at an adult emergency ward. Patients on urinary catheter (AOR:2.74,95%CI:2.04,3.68) and intubation device (AOR=2.62,95%CI:1.02,6.76) were more likely to be on antibiotics than their non-intubated/non catheterized counterparts. Patients treated at secondary-level hospitals had 0.34 times lower odds of being on antibiotics compared to those in tertiary-hospitals.

**Conclusions:** Antibiotic use across the surveyed hospitals was common and most were empiric which has both practical and policy implications for strengthening ASP and promoting rational antibiotics use.

## Strengths and limitations of the study

- This is the first multicenter point prevalence survey in Ethiopia using the standardized WHO tool, thus allowing cross-country comparisons.
- The findings are valuable in strengthening implementation of antimicrobial stewardship programs and can be used to guide future studies in Ethiopia and other low and middle-income countries.
- The findings may have limited generalizability given the study's focus on selected secondary and tertiary public hospitals of Ethiopia.
- Surgical prophylaxis may have been switched to empiric treatment without documentation, potentially inflating rate of prophylactic antibiotic use and underestimating rate of health care associated infection.

## Introduction

Since their discovery, antimicrobials have saved millions of lives, substantially reduced disease burden, improved the quality of life, and helped increase life expectancy [1]. However, Antimicrobial Resistance (AMR) is becoming a growing threat to the health of humans, animals, and the environment [2]. Every year, about 700,000 deaths are attributable to AMR and, unless urgent measures are taken, AMR will lead to 10 million deaths and would cost the global economy up to US\$ 100 trillion by 2050. It is also predicted that AMR will disproportionately affect low- and middle-income countries (LMICs) [3]. Containing and controlling AMR demands multi-sectoral collaboration and coordinated efforts across diverse sectors [4].

Although AMR is a complex problem with many interrelated contributors, the key drivers to the emergence of AMR are misuse and overuse of antimicrobials [5,6]. There is a strong correlation between antibiotic consumption and the emergence of resistant microbes [7–10]. To address this issue, the World Health Organization (WHO) has developed a Global Action Plan (GAP)[6], which includes a standardized point prevalence survey (PPS) methodology to guide optimization of antimicrobial use and AMR containment [11].

Various Ethiopian studies have shown the problems of misuse and overuse of antibiotics [12–14] and widespread resistance of microbes against locally available antibiotics including carbapenems [15,16]. Responding to this global health priority, the government of Ethiopia adopted the GAP and implemented strategies, including Antimicrobial Stewardship Program (ASP), to prevent and contain AMR. However, a general picture of antibiotic use, rate of HCAs, and quality of prescribing is lacking [11]. Hence, this multicenter PPS survey aimed to collect baseline information about antibiotic use, prevalence of HCAs, distribution of these infections according to infection site and pathogen, and quality of antibiotic prescribing among selected public hospitals in Ethiopia.

## Methods

### Study design and setting

A multi-center cross-sectional study was conducted in Ethiopian public hospitals in January 2021. We adopted the WHO methodology for PPS of HCAs and systemic antibiotic use for LMICs Version 1.1[11]. Ethiopia has a three-tier public healthcare system that broadly classifies its facilities as primary, secondary and tertiary level service providers. At the time of this survey, the estimated number of hospitals in Ethiopia was about 439 at any level (353 public, 86 private) of which 25 were tertiary, 58 secondary, and 381 primary hospitals. As part of its strategic initiatives, the Ethiopian Ministry of Health identified selected secondary and tertiary public hospitals to serve as the first cohort of facilities that will implement new ASP or strengthen existing programs. In alignment with the Ministry's programmatic priorities, we have included five secondary and five tertiary care level hospitals. The hospitals were selected based on their readiness to implement the antimicrobial stewardship program, location and catchment area of service (Supplementary file).

### Eligibility criteria

The inclusion criteria were first applied to the wards in 10 purposively selected hospitals, then to patients in the selected wards, and finally to the antibiotics prescribed and dispensed to those patients as per the WHO PPS methodology in for LMICs Version 1.1[11]. We included all hospitalized patients with a complete medical record admitted in the following acute care wards at or before 08:00 AM on the day of the survey regardless of antibiotic treatment status: adult and pediatric medical, emergency, gynecology/obstetrics, surgery, intensive care unit (ICU) and oncology-hematology. Excluded patients included: those seen in outpatient departments, outpatient dialysis centers, patients who were discharged before 8:00 AM of the day of survey but remaining in wards while awaiting transportation, undergoing treatment or surgery and were discharged or expected to be discharged on the same day, and patients receiving outpatient parenteral antibiotic therapy.

We included only oral and parenteral antibiotics when the patient was on active antibiotic therapy at 08:00 AM on the day of the survey. For instance, if a patient was on treatment

1  
2  
3 with antibiotic-A at 08:00 AM on the day of the survey but the treatment was changed to  
4 antibiotic-B at 10:00 AM, then only antibiotic-A was reported.  
5  
6  
7

## 8 **Outcome variables**

9

10 The outcome variables were prevalence of antibiotic use, proportion of HCAs among  
11 hospitalized patients and existence of functional ASP. We considered functional ASP when  
12 hospitals had been providing at least prospective audit and feedback, preauthorization  
13 and/or formulary restriction. The independent variables were types of the hospital and ward,  
14 patients' socio-demographics, clinical and treatment related characteristics.  
15  
16  
17  
18  
19

## 20 **Sample size determination and sampling technique**

21

22 For hospitals with <500 bed capacity, all eligible participants were surveyed. For those with  
23 500-800 bed capacity, every other patient was surveyed following an alphabetical listing of  
24 all eligible in-patients on the day of data collection. The next available record was included  
25 if a selected patient or medical record was not available. A consistent approach was  
26 employed across wards to ensure fidelity to predefined study procedures. Altogether, 2,209  
27 eligible patients were admitted during the survey period, and a total of 1820 patients were  
28 included in the survey and final data analyses. As per the WHO PPS methodology, 389  
29 patients were excluded from the survey because they were either (i) undergoing treatment  
30 or surgery and were discharged or expected to be discharged on the same day, or (ii)  
31 admitted to the ward after 08:00AM or discharged before 8:00AM of the survey date (Figure  
32 1).  
33  
34  
35  
36  
37  
38  
39  
40  
41  
42  
43

## 44 **Data collection and management**

45

46 A total of 100 patients, 10 from each of the participating hospitals, were used to pilot test the  
47 survey instrument. Trained data collectors fielded the survey instrument (one ASP  
48 chair/secretary and two clinical pharmacists per hospital). Data quality was assured through  
49 the implementation of a field manual guiding data collectors, regular supervision, and daily  
50 checks on data completeness, accuracy, and clarity. A validation workshop was also  
51  
52  
53  
54  
55  
56  
57

1  
2  
3 conducted to review findings with infectious disease specialists, data collectors, and other  
4 key stakeholders from the surveyed hospitals and Ethiopian Ministry of Health.  
5  
6

### 7 **Patient and Public involvement**

8  
9  
10 The survey was designed for public health surveillance purposes; it was non-experimental,  
11 did not involve any patient examination nor did it introduce interventions. There was no  
12 direct patient and public involvement in the design, recruitment and conduct of the study.  
13 Collected data were de-identified during data collection and it can therefore be considered  
14 to be a minimal risk study. All the data were extracted from the respective patient's medical  
15 records. Procedures for data collection, data management, analysis and interpretation were  
16 in accordance with the ethical and data safety regulations of the country.  
17  
18  
19  
20  
21  
22

### 23 **Data analysis and interpretation**

24  
25  
26 Data were analyzed using SPSS version 26. Descriptive analyses using frequency and  
27 percentage were used to summarize the data. A multivariable logistic regression analysis  
28 was used to explore factors affecting antimicrobial use. During univariate analysis, all  
29 variables with  $p < 0.25$  and other clinically significant variables (e.g. length of hospital stay  
30 and within 90 days hospitalization history) were included for multivariable logistic  
31 regression model. A  $p$ -value of  $<0.05$  was considered statistically significant.  
32  
33  
34  
35  
36  
37  
38  
39  
40  
41  
42  
43  
44  
45  
46  
47  
48  
49  
50  
51  
52  
53  
54  
55  
56  
57

## Results

### Demographic characteristics of patients

The mean age of patients was  $27.7 \pm 22.1$  years and the majority (690, 37.9%) of patients were in the age group of 18-39 years. There were about 90 preterm babies. Out of the 1820 patients included in the survey, a large proportion of them were from adult medical (340, 18.7%), adult surgical (330, 18.1%), and obstetrics/gynecology (309, 17.0%). Five hundred one (27.5%) patients were found to be transferred from other hospitals and 562 (30.9%) had a previous history of hospitalization in the last 90 days. Moreover, 194(10.7%) of the patients had HIV infection, 76(4.2%) had active tuberculosis, and 277(15.2%) of patients were malnourished. A peripheral vascular catheter was secured in a significant number of patients (1535, 84.3%) (Table 1).

**Table 1: Characteristics of patients**

| Variable, N= 1820                         | N(%)      |
|-------------------------------------------|-----------|
| Sex                                       |           |
| Male                                      | 848(46.6) |
| Female                                    | 972(53.4) |
| Age in years                              |           |
| 0-17                                      | 616(33.8) |
| 18 – 39                                   | 690(37.9) |
| 40-64                                     | 371(20.4) |
| ≥ 65                                      | 143(7.9)  |
| Type of preterm for pre-term babies, N=90 |           |
| Late preterm                              | 39(43.3)  |
| Moderate preterm                          | 26(28.9)  |
| Very preterm                              | 24(26.7)  |
| Extremely preterm                         | 1(0.1)    |
| Ward/unit type                            |           |
| Adult medical ward                        | 340(18.7) |
| Adult surgical ward                       | 330(18.1) |
| Obstetrics/Gynecology ward                | 309(17.0) |
| Neonatal intensive care unit              | 184(10.1) |
| Adult emergency ward                      | 181(9.9)  |
| Pediatric medical ward                    | 146(8.0)  |
| Pediatric emergency ward                  | 120(6.6)  |



|                                                                                |            |
|--------------------------------------------------------------------------------|------------|
| Adult intensive care unit                                                      | 57(3.1)    |
| Pediatric surgical ward                                                        | 56(3.1)    |
| Pediatric high risk wards                                                      | 42(2.3)    |
| Adult high risk wards                                                          | 42(2.3)    |
| Pediatric intensive care unit                                                  | 13(0.7)    |
| Current hospitalization malarial status                                        |            |
| Yes                                                                            | 33(1.8)    |
| No                                                                             | 1439(79.1) |
| Unknown                                                                        | 348(19.1)  |
| Previous malarial treatment history                                            |            |
| Yes                                                                            | 41(2.3)    |
| No                                                                             | 1517(83.3) |
| Unknown                                                                        | 262(14.4)  |
| Active tuberculosis                                                            |            |
| Yes                                                                            | 76(4.2)    |
| No                                                                             | 1499(82.4) |
| Unknown                                                                        | 245(13.4)  |
| HIV infection status                                                           |            |
| Positive                                                                       | 194(10.7)  |
| Negative                                                                       | 1421(78.0) |
| Unknown                                                                        | 205(11.3)  |
| Patients having chronic obstructive pulmonary disease                          | 28(1.5)    |
| Patients with malnutrition                                                     | 277(15.2)  |
| Referred from another hospital                                                 | 501(27.5)  |
| Patients having hospitalization history within 90 days                         | 562(30.9)  |
| Patients with peripheral vascular catheter at 8:00 AM on the day of the survey | 1535(84.3) |
| Patients with urinary catheter at 8:00 AM on the day of the survey             | 403(22.1)  |
| Patients that were intubated at 8:00 AM on the day of the survey               | 71(3.9)    |

---

HIV: Human immunodeficiency virus

## Indications for Antibiotics

From the 1820 enrolled patients, there were about 1191 (65.4%) antibiotics indications on the day of survey. The most common indication for antibiotics was HCAI (480, 40.3%). Eight

hundred eighty-seven patients had a documented infection, the most common being pneumonia (254, 28.6%) followed by clinical sepsis (158, 17.8%) and central nervous system (CNS) infections (118, 13.3%) (Table 2).

**Table 2: Indication for antibiotics and types of infections**

| Variable                                                |                                                                       | N(%)      |
|---------------------------------------------------------|-----------------------------------------------------------------------|-----------|
| <b>Indication of antibiotics among 1191 indications</b> | Healthcare-associated infections                                      | 480(40.3) |
|                                                         | Community-acquired infection                                          | 403(33.8) |
|                                                         | Surgical prophylaxis                                                  | 218(18.3) |
|                                                         | Medical prophylaxis                                                   | 86(7.2)   |
|                                                         | Unknown                                                               | 4(0.3)    |
| <b>Types of infection among the 887 patients</b>        | Pneumonia                                                             | 254(28.6) |
|                                                         | Clinical sepsis                                                       | 158(17.8) |
|                                                         | CNS infection                                                         | 118(13.3) |
|                                                         | Cellulitis, wound, deep soft tissue infection; not related to surgery | 61(6.9)   |
|                                                         | Symptomatic upper urinary tract infection                             | 59(6.7)   |
|                                                         | Gastro-intestinal infection                                           | 43(4.8)   |
|                                                         | Surgical site infection involving skin or soft tissue but not bone    | 39(4.4)   |
|                                                         | Intra-abdominal infection                                             | 35(3.9)   |
|                                                         | Gynecological infection                                               | 30(3.4)   |
|                                                         | Cardio-vascular infection                                             | 19(2.1)   |
| Others*                                                 | 71(8.0)                                                               |           |

\***Others:** Febrile neutropenia, sexually transmitted infection, Infection of ear, nose and throat, Cystic fibrosis, Symptomatic lower urinary tract infection, acute bronchitis and exacerbation of Asthma, Septic arthritis of surgical site, prostatitis, Systemic inflammatory response with no clear anatomical site, completely undefined site. HCAI: Healthcare associated infection; CAI: Community acquired infection; CNS: Central nervous system

## Microbiological tests

Microbiological diagnostics for patients treated for HCAs and CAs were rarely ordered during the survey period (119, 13.6%). If ordered, most of them were blood samples alone (53, 44.5%), followed by urine culture (26, 21.9%). Moreover, a high proportion of the results were unknown or not reported/collected (52, 43.7%). Out of 41 isolated microorganisms, about two-thirds (28, 68.3%) were gram-negative bacteria. *Escherichia coli* (8, 19.5%) and *Klebsiella pneumoniae* (7, 17.1%) were the most commonly isolated microbes. About 21 resistant phenotypes were reported and most (13, 61.9%) were third generation cephalosporin resistant Enterobacteriaceae followed by Methicillin Resistant *Staphylococcus aureus* (3, 14.3%) and Carbapenem Resistant Enterobacteriaceae (3, 14.3%) (Table 3).

**Table 3: Microbiological diagnostics and culture and sensitivity results**

| Variable                                                      | N(%)      |
|---------------------------------------------------------------|-----------|
| Sample collected for microbiological workup, N= 870 patients* |           |
| Yes                                                           | 119(13.6) |
| No                                                            | 693(79.7) |
| Unknown                                                       | 58(6.7)   |
| Specimen type, N=119 patients                                 |           |
| Blood                                                         | 53(44.5)  |
| Urine                                                         | 26(21.9)  |
| Cerebrospinal Fluid                                           | 13(10.9)  |
| Pus                                                           | 11(9.2)   |
| Blood and urine                                               | 8(6.7)    |
| Blood and Cerebrospinal fluid                                 | 6(5.1)    |
| Peritoneal fluid                                              | 2(1.7)    |
| Culture result, N=119 patients                                |           |
| Positive                                                      | 38(31.9)  |
| Negative                                                      | 29(24.4)  |
| Unknown                                                       | 52(43.7)  |
| Isolated microorganism, N=41 **                               |           |
| Gram positive bacteria                                        | 13(31.7)  |
| Gram negative bacteria                                        | 28(68.3)  |

## Type of isolated bacteria, N=41\*\*

|                                                        |         |
|--------------------------------------------------------|---------|
| <i>Escherichia coli</i>                                | 8(19.5) |
| <i>Klebsiella pneumoniae</i>                           | 7(17.1) |
| <i>Klebsiella oxytoca</i>                              | 4(9.8)  |
| <i>Acinetobacter</i>                                   | 4(9.8)  |
| <i>Staphylococcus aureus</i>                           | 4(9.8)  |
| <i>Enterobacter aerogenes</i>                          | 3(7.3)  |
| <i>Enterococcus</i>                                    | 3(7.3)  |
| <i>Coagulase negative staphylococcus</i> , contaminant | 3(7.3)  |
| Others <sup>#</sup>                                    | 5(12.2) |

## Resistant phenotype, N=21

|                                                                       |          |
|-----------------------------------------------------------------------|----------|
| 3 <sup>rd</sup> Generation Cephalosporin Resistant Enterobacteriaceae | 13(61.9) |
| Methicillin Resistant <i>Staphylococcus aureus</i>                    | 3(14.3)  |
| Carbapenem Resistant Enterobacteriaceae                               | 3(14.3)  |
| Carbapenem Resistant <i>Pseudomonas aeruginosa</i>                    | 1(4.8)   |
| Carbapenem Resistant <i>Acinetobacter</i>                             | 1(4.8)   |

\*only for those whose indication type is for healthcare associated infection and community acquired infection.

\*\*for one patient *Klebsiella oxytoca* from blood and *Klebsiella pneumoniae* from urine, from another patient *streptococcus* from blood and *Klebsiella Pneumoniae* from blood and another one *Klebsiella Pneumoniae* from urine and *Acinetobacter* from blood were isolated. <sup>#</sup>*Pseudomonas aeruginosa*, *Citrobacter*, Gram positive cocci, *Group A streptococcus*, *Group D streptococcus*.

## Readiness to implement antimicrobial stewardship program

All surveyed hospitals had functional infection prevention and control committee and only eight hospitals had functional Drugs and Therapeutics Committee. Although a defined organizational structure for ASP was present in all surveyed hospitals, a formal ASP team was only available in seven (70%) hospitals and none were functional during the survey period. None of the hospitals monitored antibiotic use per defined daily dose or days of therapy and hospital activity denominator. Microbiological services were available in eight of the surveyed hospitals, and the average number of blood cultures performed in the previous fiscal year 2019/2020 was 2625 ±3307. Different classes of broad- and narrow-spectrum antibiotics were stock out during the survey period (Supplementary file).

## Antibiotics use prevalence and indication

Of the 1820 surveyed patients, 63.8% had at least one antibiotic prescription on the day of the survey. The prevalence of antibiotic use was higher in adult intensive care unit patients (49, 86.0%) followed by pediatric emergency (112, 76.7%) and pediatric medical wards (94, 78.3%)(Table 4).

On the day of the survey, 2059 antibiotics were prescribed for 1162 patients with antibiotics prescribing ratio of 1.77 per patient. More than half (585, 50.3%) patients were on two antibiotics. Most antibiotics were prescribed in their generic name (1998, 97.1%) and were administered parenterally (1858, 90.2%). The mean duration of treatment from initiation to survey date was  $7.72 \pm 7.9$  days. A significantly higher proportion of treatments were empiric (837, 96.7%). As per the WHO definition of guideline compliance[11], only 637 (54.8%) of the treatments were compliant with the guideline (Supplementary file).

As shown in Table 4, the most widely prescribed antibiotics across all surveyed hospitals were ceftriaxone (626, 30.4%) followed by metronidazole (317, 15.4%), ampicillin (249, 12.1%) and vancomycin (217, 10.5%). Ceftriaxone (157, 54.7%) was the most widely prescribed antibiotic for surgical prophylaxis followed by metronidazole (64, 22.3%). A significantly higher proportion of patients (180, 82.6%) were on prolonged duration of antibiotics for surgical prophylaxis.

**Table 4: Proportion patients on antibiotics and types of antibiotics prescriptions**

| Antibiotics                                                              | N(%)       |
|--------------------------------------------------------------------------|------------|
| <b>Proportion of patients on antibiotics per surveyed wards, n= 1162</b> |            |
| Adult surgical ward                                                      | 219(66.4%) |
| Adult medical ward                                                       | 199(58.5%) |
| Obstetrics & Gynecology                                                  | 157(50.8%) |
| Neonatal intensive care unit                                             | 140(76.1%) |
| Pediatric medical ward                                                   | 112(76.7%) |
| Adult emergency ward                                                     | 97(53.6%)  |
| Pediatric emergency ward                                                 | 94(78.3%)  |
| Adult intensive care unit                                                | 49(86%)    |
| Pediatric surgical ward                                                  | 41(73.2%)  |
| Pediatric high risk wards                                                | 32(76.2%)  |

|    |                                                                        |           |
|----|------------------------------------------------------------------------|-----------|
| 1  |                                                                        |           |
| 2  |                                                                        |           |
| 3  | Adult high risk ward                                                   | 13(31%)   |
| 4  | Pediatric Intensive Care Unit                                          | 9(69.2%)  |
| 5  |                                                                        |           |
| 6  | <b>Types of antibiotics prescribed for therapeutic use, n= 2059</b>    |           |
| 7  | Ceftriaxone                                                            | 626(30.4) |
| 8  | Metronidazole                                                          | 317(15.4) |
| 9  | Ampicillin                                                             | 249(12.1) |
| 10 | Vancomycin                                                             | 217(10.5) |
| 11 | Gentamycin                                                             | 178(8.6)  |
| 12 | Ceftazidime                                                            | 116(5.6)  |
| 13 | Trimethoprim/Sulphamethoxazole                                         | 72(3.5)   |
| 14 | Cloxacillin                                                            | 49(2.4)   |
| 15 | Ciprofloxacin                                                          | 42(2.0)   |
| 16 | Cefepime                                                               | 40(1.9)   |
| 17 | Meropenam                                                              | 39(1.9)   |
| 18 | Azithromycin                                                           | 25(1.2)   |
| 19 | Others*                                                                | 89(4.3)   |
| 20 |                                                                        |           |
| 21 | <b>Type of antibiotics prescribed for surgical prophylaxis, n= 287</b> |           |
| 22 | Ceftriaxone                                                            | 157(54.7) |
| 23 | Metronidazole                                                          | 64(22.3)  |
| 24 | Ampicillin                                                             | 55(19.2)  |
| 25 | Cephalexin                                                             | 4(1.4)    |
| 26 | Amoxicillin                                                            | 3(1.0)    |
| 27 | Others **                                                              | 4(1.4)    |
| 28 |                                                                        |           |
| 29 | <b>Dosage for surgical prophylaxis, n= 218 patients</b>                |           |
| 30 | Single dose                                                            | 7(3.2)    |
| 31 | Multiple doses over 24 hours only                                      | 31(14.2)  |
| 32 | Multiple doses for more than 24 hours                                  | 180(82.6) |

**Ratio of antibiotics per surgical procedure** (number of antibiotics used for surgery/total number of patients who were on SP) =**1.32**

\* Amoxicillin=20; Cefotaxime=13; Amoxicillin-clavulanic acid=12; Cephalexin=9; Crystalline-penicillin= 6; Erythromycin= 6; Norfloxacin = 5; Benzanthine penicillin= 4; Clindamycin= 4; Doxycycline = 3; Chloramphenicol= 2; Clarithromycin = 1; Nitrofurantoin= 1; Cefixime = 1; Ampicillin-sulbactam = 1, \*\*Amoxicillin-clavulanate, Ciprofloxacin, Cloxacillin and Gentamycin.

### Factors associated with antibiotic use

From the multivariable analysis, age, ward type, hospital type, history of being catheterized, history of being intubated, and HIV infection status were significantly associated with being on antibiotics. Patients aged between 18-39 years (AOR= 0.61, 95%CI: 0.38,0.86) and 40-64 years old (AOR=0.55, 95%CI: 0.39, 0.93) had a lower odds of being on antibiotics compared with patients 17 years or younger. Moreover, patients treated in pediatric medical and emergency wards were about four times more likely to be on antibiotics compared to

patients in an adult emergency ward. The study also found that being on urinary catheter and intubation device had a significant association with antibiotics use status, where they were nearly three times more likely to be on antibiotics compared to non-catheterized and non-intubated patients (Table 5).

**Table 5: Univariate and multivariable binary logistic regression analysis of predictors of antibiotics use among the surveyed hospitals**

| Variables                                     | Patient on antibiotics |           | COR, 95%CI         | AOR, 95%CI         |
|-----------------------------------------------|------------------------|-----------|--------------------|--------------------|
|                                               | Yes, n(%)              | No, n(%)  |                    |                    |
| <b>Age in years</b>                           |                        |           |                    |                    |
| 0-17                                          | 460(39.6)              | 156(23.7) | 1.00               | 1.00               |
| 18-39                                         | 406(34.9)              | 284(43.6) | 0.49(0.38,0.61)**  | 0.61(0.38,0.86)*   |
| 40-64                                         | 211(18.2)              | 160(24.3) | 0.45(0.34, 0.59)*  | 0.55(0.39, 0.93)*  |
| ≥ 65                                          | 85(7.3)                | 58(8.8)   | 0.5(0.34, 0.73)**  | 1.45(0.31, 3.59)   |
| <b>Gender</b>                                 |                        |           |                    |                    |
| Female                                        | 584(50.3)              | 388(59.0) | 1.00               | 1.00               |
| Male                                          | 578(49.7)              | 270(41.0) | 1.42(1.17, 1.73)*  | 1.18(0.93, 1.49)   |
| <b>Ward type</b>                              |                        |           |                    |                    |
| Pediatric medical                             | 112(9.6)               | 34(5.2)   | 2.85(1.76, 4.62)*  | 3.78(1.81, 7.9)**  |
| Pediatric surgical                            | 41(3.5)                | 15(2.3)   | 2.37(1.22, 4.58)   | 2.31(0.96, 5.51)   |
| Pediatric high risk                           | 32(27.5)               | 10(1.5)   | 2.77(1.29, 5.97)   | 4.15(1.59, 10.8)*  |
| Pediatric ICU                                 | 9(0.8)                 | 4(0.6)    | 1.95(0.58, 6.56)   | 1.57(0.38, 6.50)   |
| Pediatric emergency                           | 94(8.1)                | 26(4.0)   | 3.13(1.86, 5.28)*  | 4.22(1.98, 9.02)** |
| Neonatal ICU                                  | 140(12.0)              | 44(6.7)   | 2.76(1.76, 4.31)*  | 3.27(1.59, 6.67)*  |
| Adult medical                                 | 199(17.1)              | 141(21.4) | 1.22(0.85, 1.76)   | 1.31(0.89, 1.92)   |
| Adult surgical                                | 219(18.8)              | 111(16.9) | 1.71(1.18, 2.48)   | 2.00(1.36, 2.95)** |
| Adult high risk                               | 13(1.1)                | 29(4.4)   | 0.39(0.19, 0.79)   | 0.45(0.22, 0.96)*  |
| Adult ICU                                     | 49(4.2)                | 8(1.2)    | 5.30(2.38, 11.83)* | 2.68(1.05, 6.88)   |
| Gyny/Obs                                      | 157(13.5)              | 152(23.1) | 0.89(0.62, 1.29)   | 0.83(0.54, 1.27)   |
| Adult emergency                               | 97(8.3)                | 84(12.8)  | 1.00               | 1.00               |
| <b>Urinary catheterization status</b>         |                        |           |                    |                    |
| No                                            | 846(72.8)              | 571(86.8) | 1.00               | 1.00               |
| Yes                                           | 316(27.2)              | 87(13.2)  | 2.45(1.89, 3.18)*  | 2.74(2.04, 3.68)*  |
| <b>Intubation status</b>                      |                        |           |                    |                    |
| No                                            | 1098(94.5)             | 650(98.8) | 1.00               | 1.00               |
| Yes                                           | 63(5.5)                | 8(1.2)    | 4.66(2.22, 9.79)*  | 2.62(1.02, 6.76)** |
| <b>HIV infection status</b>                   |                        |           |                    |                    |
| Yes                                           | 161(13.9)              | 33(5.0)   | 1.00               | 1.00               |
| No                                            | 867(74.6)              | 554(84.2) | 0.32(0.22,0.47)**  | 0.19(0.13,0.30)**  |
| Unknown                                       | 134(11.5)              | 71(10.8)  | 0.39(0.24,0.62)**  | 0.24(0.15,0.40)**  |
| <b>Within 90 days hospitalization history</b> |                        |           |                    |                    |
| Yes                                           | 366(31.5)              | 196(29.8) | 1.00               | 1.00               |

1  
2  
3  
4  
5  
6  
7  
8  
9  
10  
11  
12  
13  
14  
15  
16  
17  
18  
19  
20  
21  
22  
23  
24  
25  
26  
27  
28  
29  
30  
31  
32  
33  
34  
35  
36  
37  
38  
39  
40  
41  
42  
43  
44  
45  
46  
47  
48  
49  
50  
51  
52  
53  
54  
55  
56  
57  
58  
59  
60

|                                          |           |           |                   |                   |
|------------------------------------------|-----------|-----------|-------------------|-------------------|
| No                                       | 796(68.5) | 462(70.2) | 0.93(0.75, 1.14)  | 0.85(0.67, 1.06)  |
| <b>Length of hospitalization in days</b> |           |           | 0.998(0.99, 1.00) | 1.00(0.99, 1.01)  |
| <b>Hospital type</b>                     |           |           |                   |                   |
| Secondary care                           | 623(53.6) | 304(46.2) | 1.00              | 1.00              |
| Tertiary care                            | 539(46.4) | 354(53.8) | 0.74(0.61, 0.90)* | 0.66(0.53, 0.81)* |

\* $p < 0.05$ , \*\*statistically significant at  $p < 0.0001$ . AOR: Adjusted odds ratio; COR: Crude odds ratio

For peer review only



## Discussion

Antimicrobial resistance is becoming a global threat exacting a major toll on human, animal, and environmental health [17–20]. Ethiopia, like many nations, has not been immune from the negative effects of AMR [16,21,22]. While there have been initiatives to address this pressing health challenge, the few national and institutional efforts have had limited success. Mounting an effective national response to combat AMR requires robust information on the scope of infections and antimicrobial agents being used in healthcare institutions. Using the WHO's standardized PPS methodology, this study assessed the burden of HCAs and antibiotic use in selected public hospitals of Ethiopia.

Similar to studies done elsewhere [13,23,24], the most common indication for antibiotics therapy was for HCAs (40.3%), with pneumonia and clinical sepsis accounting for the lion share of indications. This high burden of infections might be a reason for misuse and overuse of antibiotics, potentially straining the already resource constrained hospitals, patients, and family caregivers [13]. Hence, efforts to effectively treat, prevent, and reduce HCAs are needed. To achieve these, implementing interventions such as strengthening and integrating infection prevention and control practice, developing and enforcing the use of institution specific standard treatment guidelines, and providing in-service trainings are needed. Strengthening microbiology laboratories to guide definitive treatment is also invaluable towards the achievement of this goal.

Empiric prescribing for broad-spectrum antibiotics (96.7%) was a common finding across the surveyed hospitals, something that has been reported in studies from other LMIC countries [24–27]. This may have resulted from lack of- and poor utilization of microbiology services, as seen by the hospitals' limited use of culture and sensitivity tests. This also parallels overuse of antibiotics in general (63.8%), consistent with findings from countries with similar economic contexts (use ranging from 70.6% to 80.1%) [24–27] but contrasting with those from HICs (27.1–50.3%) [23,28–30]. An internet-based PPS done across 53 countries (LMICs and HICs) has also reported higher antimicrobial use in LMICs compared to HICs[31].

1  
2  
3 An enduring overuse of antibiotics for a prolonged duration in many LMICs compared to  
4 HICs [13,26,32] might be attributed to lack of a national and institutional antibiotic guideline  
5 and poor diagnostic infrastructure which can promote empiric but also high rates of  
6 irrational antibiotic use. Although most of the surveyed hospitals had microbiological  
7 services, only one hospital developed institutional guideline as per the antibiogram data.  
8 This suggests poor utilization of microbiology services to guide empiric antibiotic use and  
9 highlights the missed opportunities in promoting rational antibiotic use [33]. Recently, a  
10 pharmacist-led ASP implemented in one of the tertiary care hospitals of Ethiopia was well  
11 received and shown to be beneficial [13]. Lessons from such programs should be leveraged  
12 to promote widespread adoption of ASP to decrease antibiotic consumption, save costs, and  
13 improve outcomes. Additionally, enhancing capacity of existing ASPs through leadership and  
14 governance support will be critical as these were identified to be deficient in the surveyed  
15 hospitals.

16  
17 In this study, there was also a substantial difference in the prevalence of antibiotics use  
18 across different levels of surveyed hospitals where a statistically significant higher antibiotic  
19 use was reported in tertiary care hospitals compared to secondary hospitals. There were  
20 also disparities with respect to the type of prescribed antibiotics compared to other studies.  
21 Similar to studies done in Pakistan [26] and Ethiopia [12,13,25], the most widely prescribed  
22 antibiotic was the 3<sup>rd</sup>-generation cephalosporin, ceftriaxone (30.4%) which is included  
23 under the WHO watch category of Access, Watch and Reserve(AWaRe) classification of  
24 antibiotics [6]. In developed countries however, the most commonly prescribed antibiotics  
25 were penicillins with  $\beta$ -lactamase inhibitors[23,31]. Nitroimidazole was the most commonly  
26 prescribed antibiotic in Nigeria [8].

27  
28 Prolonged use of surgical prophylaxis (>24hours) was high in this study (82.6%), similar to  
29 studies from other LMICs (73% to 100%) [24,26,27,34–36]. The recommended duration of  
30 surgical prophylaxis is one day [37–39] since prolonging duration potentially increases the  
31 rate of AMR, side effects, and costs for both the patient and the hospital [40–42].  
32 Furthermore, average number of antibiotics prescribed per patient for surgical prophylaxis  
33 was 1.32 despite several studies and guidelines demonstrating the cost-effectiveness of  
34 single narrow-spectrum antibiotics, usually cefazolin [30,37,43–46]. However, in the current  
35  
36  
37  
38  
39  
40  
41  
42  
43  
44  
45  
46  
47  
48  
49  
50  
51  
52  
53  
54  
55  
56  
57

1  
2  
3 study, ceftriaxone (54.7%) was the widely prescribed antibiotic for surgical prophylaxis. The  
4 widespread use of broad-spectrum 3<sup>rd</sup> generation cephalosporin's in our survey might be  
5 due to unavailability of cefazolin in all of the surveyed hospitals. Hence, due to proven safety  
6 and efficacy of Cefazolin, it is time for Ethiopia to include it on the essential medicine list,  
7 ensure its availability, and develop guidelines to promote use of cefazolin or other narrow-  
8 spectrum antibiotics for surgical prophylaxis.  
9  
10  
11  
12  
13

14 Our study has some limitations. First, the study only included purposely-selected tertiary  
15 and secondary hospitals. Hence, the findings may not be generalizable to all settings. Second,  
16 because this was a point prevalence survey (i.e., cross-sectional study), patients were not  
17 followed-up in time. As a result, it was not possible to measure outcomes that had a temporal  
18 element such as AMR, duration of antibiotic use and length of hospital stay. Some surgical  
19 prophylaxis orders might have been changed to empiric treatment for suspected infection  
20 without proper documentation reflecting such change. This would inflate the rate of  
21 prolonged surgical prophylaxis, but underestimate the true rate of HCAI. Third, the reported  
22 microbiology finding may not be representative of the hospital population as a whole and  
23 could overestimate rate of AMR. This is because microbiologic investigations are mostly  
24 conducted for patients with severe diseases and those who failed first-line therapy. Hence,  
25 the reported microbiology finding may not be representative of the hospital population as a  
26 whole and could overestimate rate of AMR.  
27  
28  
29  
30  
31  
32  
33  
34  
35  
36  
37

38 Despite these limitations, the study is the first multicenter study in Ethiopia using a  
39 standardized PPS methodology from the WHO. The findings are based on large sample size  
40 and are robust enough to guide similar studies to be conducted in Ethiopia and other LMICs.  
41 Furthermore, the findings could aid policymakers and other concerned bodies in  
42 strengthening ASP, optimizing antibiotics use, and containing and preventing AMR.  
43  
44  
45  
46  
47  
48

## 49 **Conclusions**

50  
51 Similar to studies from other LMICs, there was widespread use of antibiotics and a high  
52 burden of HCAs. Moreover, prolonged use of broad-spectrum antibiotics was a common  
53 practice for surgical prophylaxis suggesting an important target for ASP intervention. Almost  
54  
55  
56  
57

1  
2  
3 all treatments were empiric and hospitals should be further stimulated to regularly monitor  
4 antibiotic use and set local targets to optimize their use.  
5  
6  
7

## 8 **Abbreviations**

9  
10  
11 **AMR:** Antimicrobial resistance; **ASP:** Antimicrobial stewardship program; **CAIs:**  
12 Community-acquired infections; **HCAIs:** Healthcare-associated infections; **HICs:** High-  
13 income countries; **LMICs:** Low- and middle-income countries; **PPS:** Point prevalence survey  
14  
15  
16  
17

## 18 **Authors' contributions**

19  
20  
21  
22 **AMF:** prepared the draft manuscript; **YD and MW:** funding acquisition; **AMF, YD, GA, WS**  
23 **and MW:** research planning, conduct and organization of data collection; **AMF, YD, GA, WS,**  
24 **MW, EA and GBG:** supervision, visualization, conception, design, acquisition of data, analysis  
25 and interpretation of the results; **AMF, YD, WS, MW, GA, EA and GBG:** took part in revising  
26 it critically for important intellectual content. All authors gave final approval of the  
27 manuscript and agree to be accountable for all aspects of the work.  
28  
29  
30  
31  
32  
33  
34

## 35 **Funding**

36  
37 This multicenter PPS of antibiotic use and HCAIs in selected hospitals was commissioned by  
38 the Ethiopian Federal Ministry of Health (EFMOH) with the financial and technical assistance  
39 of the WHO. Dr. Abebe received support from the National Institutes of Health (NIH),  
40 National Center for Advancing Translational Sciences, Clinical and Translational Sciences  
41 Award, Grant Numbers, KL2TR002530 (PI: Carroll), and UL1TR002529 (PI: Shekhar).  
42  
43  
44  
45  
46  
47

## 48 **Ethical Considerations**

49  
50  
51 Ethical clearance was obtained from the Ethiopian Federal Ministry of Health. Before data  
52 collection, permission was sought from respective hospital administration. Collected data  
53  
54  
55  
56  
57

1  
2  
3 were de-identified during data collection and data were analyzed in aggregate to maintain  
4 confidentiality and anonymity of information.  
5  
6

7  
8 **Competing interests:** None  
9

### 10 **Patient consent for publication**

11  
12  
13 Not required  
14

### 15 **Data availability statement**

16 All data relevant to the study are included in the article or uploaded as supplementary  
17 information.  
18  
19

### 20 **Acknowledgments**

21  
22 We express our gratitude for all Hospitals for their invaluable assistance during our data  
23 collection. The PPS protocol adopted from the WHO methodology for PPS on antibiotic use  
24 in hospitals for LMICs. We also would like to extend our appreciation to the data collectors  
25 assigned from the hospitals as well as to all validation workshop participants for their  
26 insightful feedback.  
27  
28  
29  
30  
31  
32  
33  
34  
35  
36  
37  
38  
39  
40  
41  
42  
43  
44  
45  
46  
47  
48  
49  
50  
51  
52  
53  
54  
55  
56  
57

## References

- 1 Kardos N, Demain AL. Penicillin: The medicine with the greatest impact on therapeutic outcomes. *Appl. Microbiol. Biotechnol.* 2011; **92**(4):677-87. doi:10.1007/s00253-011-3587-6
- 2 Lobanovska M, Pilla G. Penicillin's Discovery and Antibiotic Resistance: Lessons for the Future? *Yale J Biol Med.* 2017;**90**(1):135-145.
- 3 O'Neill J. Antimicrobial Resistance : Tackling a crisis for the health and wealth of nations. 2016.
- 4 The World Bank. Drug-resistant infections: A Threat to Our Economic Future. *World Bank Rep.* 2017.
- 5 Michael CA, Dominey-Howes D, Labbate M. The antimicrobial resistance crisis: causes, consequences, and management. *Front Public Health.* 2014 ;**2**:145. doi: 10.3389/fpubh.2014.00145.
- 6 World Health Organization. Global Action Plan on Antimicrobial Resistance. *Microbe Mag.* 2015;**10**:354–5. doi:10.1128/microbe.10.354.1
- 7 Centers for Disease Control and Prevention. Antibiotic Use in the United States. Progress and Opportunities. Atlanta, GA: US Department of Health and Human Services. CDC; 2017.
- 8 Abubakar U. Point-prevalence survey of hospital acquired infections in three acute care hospitals in Northern Nigeria. *Antimicrob Resist Infect Control.* 2020;**9**:1–7. doi:10.1186/s13756-020-00722-9
- 9 Ayukekbong JA, Ntemgwa M, Atabe AN. The threat of antimicrobial resistance in developing countries: Causes and control strategies. *Antimicrob Resist Infect Control.* 2017;**6**:1–8. doi:10.1186/s13756-017-0208-x
- 10 Mboya EA, Sanga LA, Ngocho JS. Irrational use of antibiotics in the moshi municipality Northern Tanzania: A cross sectional study. *Pan Afr Med J.* 2018;**31**:1–10.

- 1  
2  
3 doi:10.11604/pamj.2018.31.165.15991  
4  
5  
6 11 World Health Organization. WHO Methodology for Point Prevalence Survey on  
7 Antibiotics Use in Hospitals. 2018;**Version 1**.  
8  
9  
10 12 Alemkere G, Tenna A, Engidawork E. Antibiotic use practice and predictors of hospital  
11 outcome among patients with systemic bacterial infection: Identifying targets for  
12 antibiotic and health care resource stewardship. *PLoS One*. 2019; 14(2):e0212661.  
13 doi:10.1371/journal.pone.0212661  
14  
15  
16 13 Gebretekle GB, Haile Mariam D, Abebe Taye W, *et al*. Half of Prescribed Antibiotics Are  
17 Not Needed: A Pharmacist-Led Antimicrobial Stewardship Intervention and Clinical  
18 Outcomes in a Referral Hospital in Ethiopia. *Front Public Heal*. 2020; **8**:109.  
19 doi:10.3389/fpubh.2020.00109  
20  
21  
22 14 Argaw, N.A., Shumbash, K.Z., Asfaw, A.A. *et al*. Assessment of surgical antimicrobial  
23 prophylaxis in Orthopaedics and Traumatology Surgical Unit of a Tertiary Care  
24 Teaching Hospital in Addis Ababa. *BMC Res Notes*. 2017; **10**:160 (2017). doi:  
25 https://doi.org/10.1186/s13104-017-2475-2  
26  
27  
28 15 Abebe W, Alemayehu T, Kong L, *et al*. Alarming rates of drug-resistant Gram-negative  
29 bloodstream infections among hospitalized patients in Ethiopia : an urgent call to  
30 strengthen diagnostic bacteriology and antimicrobia. *28th Eur Congr Clin Microbiol*  
31 *Infect Dis*. 2018.  
32  
33  
34 16 Alemayehu, T., Ali, M., Mitiku, E. *et al*. The burden of antimicrobial resistance at  
35 tertiary care hospital, southern Ethiopia: a three years' retrospective study. *BMC Infect*  
36 *Dis*. 2017; **19**:585 (2019). doi: https://doi.org/10.1186/s12879-019-4210-1.  
37  
38  
39 17 Mouiche, M.M.M., Moffo, F., Akoachere, JF.T.K. *et al*. Antimicrobial resistance from a  
40 one health perspective in Cameroon: a systematic review and meta-analysis. *BMC*  
41 *Public Health*. 2019; **19**:1135 (2019). doi: https://doi.org/10.1186/s12889-019-  
42 7450-5  
43  
44  
45  
46  
47  
48  
49  
50  
51  
52  
53  
54  
55  
56 18 Nellums LB, Thompson H, Holmes A, *et al*. Antimicrobial resistance among migrants in  
57

- 1  
2  
3 Europe: a systematic review and meta-analysis. *Lancet Infect Dis.* 2018;**18**:796–811.  
4 doi:10.1016/S1473-3099(18)30219-6  
5  
6  
7  
8 19 Aminov RI. A brief history of the antibiotic era: lessons learned and challenges for the  
9 future. *Front Microbiol.* 2010;**1**:134. doi: 10.3389/fmicb.2010.00134.  
10  
11  
12 20 Midega J. Estimating the global burden of antimicrobial resistance: Reflections on  
13 current methods and data needs. *Wellcome Open Res.* 2020;**5**:48.  
14 doi:10.12688/wellcomeopenres.15680.1  
15  
16  
17  
18 21 Muhie OA. Antibiotic Use and Resistance Pattern in Ethiopia: Systematic Review and  
19 Meta-Analysis. *Int J Microbiol.* 2019; **2019**: 2489063. doi: 10.1155/2019/2489063  
20  
21  
22 22 Ibrahim RA, Teshale AM, Dinku SF, *et al.* Erratum: Antimicrobial resistance  
23 surveillance in Ethiopia: Implementation experiences and lessons learned. *Afr J Lab*  
24  
25  
26  
27  
28 23 Frenette C, Sperlea D, German GJ, *et al.* The 2017 global point prevalence survey of  
29 antimicrobial consumption and resistance in Canadian hospitals. *Antimicrob Resist*  
30  
31  
32  
33  
34  
35 24 Anand Paramadhas BD, Tiroyakgosi C, Mpinda-Joseph P, *et al.* Point prevalence study  
36 of antimicrobial use among hospitals across Botswana; findings and implications.  
37  
38  
39  
40  
41 25 Gutema G, Håkonsen H, Engidawork E, *et al.* Multiple challenges of antibiotic use in a  
42 large hospital in Ethiopia - A ward-specific study showing high rates of hospital-  
43 acquired infections and ineffective prophylaxis. *BMC Health Serv Res.* 2018.  
44 doi:10.1186/s12913-018-3107-9  
45  
46  
47  
48 26 Saleem Z, Saeed H, Hassali MA, *et al.* Pattern of inappropriate antibiotic use among  
49 hospitalized patients in Pakistan: A longitudinal surveillance and implications.  
50  
51  
52  
53  
54  
55 27 Abubakar U. Antibiotic use among hospitalized patients in northern Nigeria: A  
56  
57



- 1  
2  
3 multicenter point-prevalence survey. *BMC Infect Dis.* 2020;**20**:1–9.  
4 doi:10.1186/s12879-020-4815-4  
5  
6  
7  
8 28 Ciofi Degli Atti ML, D'Amore C, Ceradini J, *et al.* Prevalence of antibiotic use in a tertiary  
9 care hospital in Italy, 2008-2016. *Ital J Pediatr.* 2019. doi:10.1186/s13052-019-0645-  
10 7  
11  
12  
13  
14 29 Sorensen H. Trends in U. S. Antibiotic Use. *Pew Charit Trust.* 2018:1–9.  
15  
16  
17 30 Vandael E, Latour K, Goossens H, *et al.* Point prevalence survey of antimicrobial use  
18 and healthcare-associated infections in Belgian acute care hospitals: Results of the  
19 Global-PPS and ECDC-PPS 2017. *Antimicrob Resist Infect Control.* 2020;**9**:1–13.  
20 doi:10.1186/s13756-019-0663-7  
21  
22  
23  
24 31 Versporten A, Zarb P, Caniaux I, *et al.* Antimicrobial consumption and resistance in  
25 adult hospital inpatients in 53 countries: results of an internet-based global point  
26 prevalence survey. *Lancet Glob Heal.* 2018. doi:10.1016/S2214-109X(18)30186-4  
27  
28  
29  
30 32 Versporten A, Zarb P, Caniaux I, *et al.* Antimicrobial consumption and resistance in  
31 adult hospital inpatients in 53 countries: results of an internet-based global point  
32 prevalence survey. *Lancet Glob Heal.* 2018;**6**:e619–29. doi:10.1016/S2214-  
33 109X(18)30186-4  
34  
35  
36  
37  
38 33 de With K, Allerberger F, Amann S, *et al.* Strategies to enhance rational use of  
39 antibiotics in hospital: a guideline by the German Society for Infectious Diseases.  
40 *Infection:* 2016;**44**:395–439. doi:10.1007/s15010-016-0885-z  
41  
42  
43  
44 34 Afriyie DK, Sefah IA, Sneddon J, *et al.* Antimicrobial point prevalence surveys in two  
45 Ghanaian hospitals: opportunities for antimicrobial stewardship. *JAC-Antimicrobial*  
46 *Resist.* 2020;**2**:1–9. doi:10.1093/jacamr/dlaa001  
47  
48  
49  
50 35 Horumpende PG, Mshana SE, Mouw EF, *et al.* Point prevalence survey of antimicrobial  
51 use in three hospitals in North-Eastern Tanzania. *Antimicrob Resist Infect Control.*  
52 2020;**9**:1–6. doi:10.1186/s13756-020-00809-3  
53  
54  
55  
56  
57

- 1  
2  
3 36 Van Der Sandt N, Schellack N, Mabope LA, *et al.* Surgical antimicrobial prophylaxis  
4 among pediatric patients in south africa comparing two healthcare settings. *Pediatr*  
5 *Infect Dis J.* 2019. doi:10.1097/INF.0000000000002072  
6  
7  
8  
9 37 Berriós-Torres SI, Umscheid CA, Bratzler DW, *et al.* Centers for disease control and  
10 prevention guideline for the prevention of surgical site infection. *JAMA Surg.* 2017.  
11 doi:10.1001/jamasurg.2017.0904  
12  
13  
14  
15 38 Bratzler DW, Dellinger EP, Olsen KM, *et al.* Clinical practice guidelines for  
16 antimicrobial prophylaxis in surgery. *Surg Infect (Larchmt).* 2013;**14**:73–156.  
17 doi:10.1089/sur.2013.9999  
18  
19  
20  
21 39 Jocum J. Surgical antibiotic prophylaxis: Are you doing it right? *South African J Anaesth*  
22 *Analg.* 2018;**24**:S49–53.  
23  
24  
25  
26 40 Roberts SA, Morris AJ. Surgical antibiotic prophylaxis: more is not better. *Lancet Infect*  
27 *Dis.* 2020;**20**:1110–1. doi:10.1016/S1473-3099(20)30290-5  
28  
29  
30 41 Bratzler DW, Dellinger EP, Olsen KM, *et al.* Balancing the Risks and Benefits of Surgical  
31 Prophylaxis Timing and Duration Do Matter. *Am J Heal Pharm.* 2013;**70**:195–283.  
32 doi:10.2146/ajhp120568  
33  
34  
35  
36 42 Branch-Elliman W, O'Brien W, Strymish J, *et al.* Association of Duration and Type of  
37 Surgical Prophylaxis with Antimicrobial-Associated Adverse Events. In: *JAMA Surgery.*  
38 2019. doi:10.1001/jamasurg.2019.0569  
39  
40  
41  
42 43 Pinto-Lopes R, Sousa-Pinto B, Azevedo LF. Single dose versus multiple dose of  
43 antibiotic prophylaxis in caesarean section: a systematic review and meta-analysis.  
44 *BJOG An Int. J. Obstet. Gynaecol.* 2017; **124**(4): doi:10.1111/1471-0528.14373  
45  
46  
47  
48 44 Slobogean GP, Kennedy SA, Davidson D, O'Brien PJ. Single- versus multiple-dose  
49 antibiotic prophylaxis in the surgical treatment of closed fractures: a meta-analysis. *J*  
50 *Orthop Trauma.* 2008;**22**(4):264-9. doi: 10.1097/BOT.0b013e31816b7880. PMID:  
51 18404036.  
52  
53  
54  
55  
56  
57

- 1  
2  
3 45 Ierano C, Nankervis JM, James R, Rajkhowa A, Peel T, Thursky K. Surgical antimicrobial  
4 prophylaxis. *Aust Prescr*. 2017;**40**(6):225-229. doi:10.18773/austprescr.2017.073  
5  
6  
7 46 Bratzler DW, Dellinger EP, Olsen KM, et al. Clinical practice guidelines for  
8 antimicrobial prophylaxis in surgery. *Surg Infect (Larchmt)*. 2013;**14**(1):73-156. doi:  
9 10.1089/sur.2013.9999.  
10  
11  
12  
13  
14  
15  
16  
17  
18  
19  
20  
21  
22  
23  
24  
25  
26  
27  
28  
29  
30  
31  
32  
33  
34  
35  
36  
37  
38  
39  
40  
41  
42  
43  
44  
45  
46  
47  
48  
49  
50  
51  
52  
53  
54  
55  
56  
57

1  
2  
3  
4  
5  
6  
7  
8  
9  
10  
11  
12  
13  
14  
15  
16  
17  
18  
19  
20  
21  
22  
23  
24  
25  
26  
27  
28  
29  
30  
31  
32  
33  
34  
35  
36  
37  
38  
39  
40  
41  
42  
43  
44  
45  
46  
47  
48  
49  
50  
51  
52  
53  
54  
55  
56  
57  
58  
59  
60

**Figure legend**

Figure 1: Diagrammatic scheme of study participant recruitment process

For peer review only

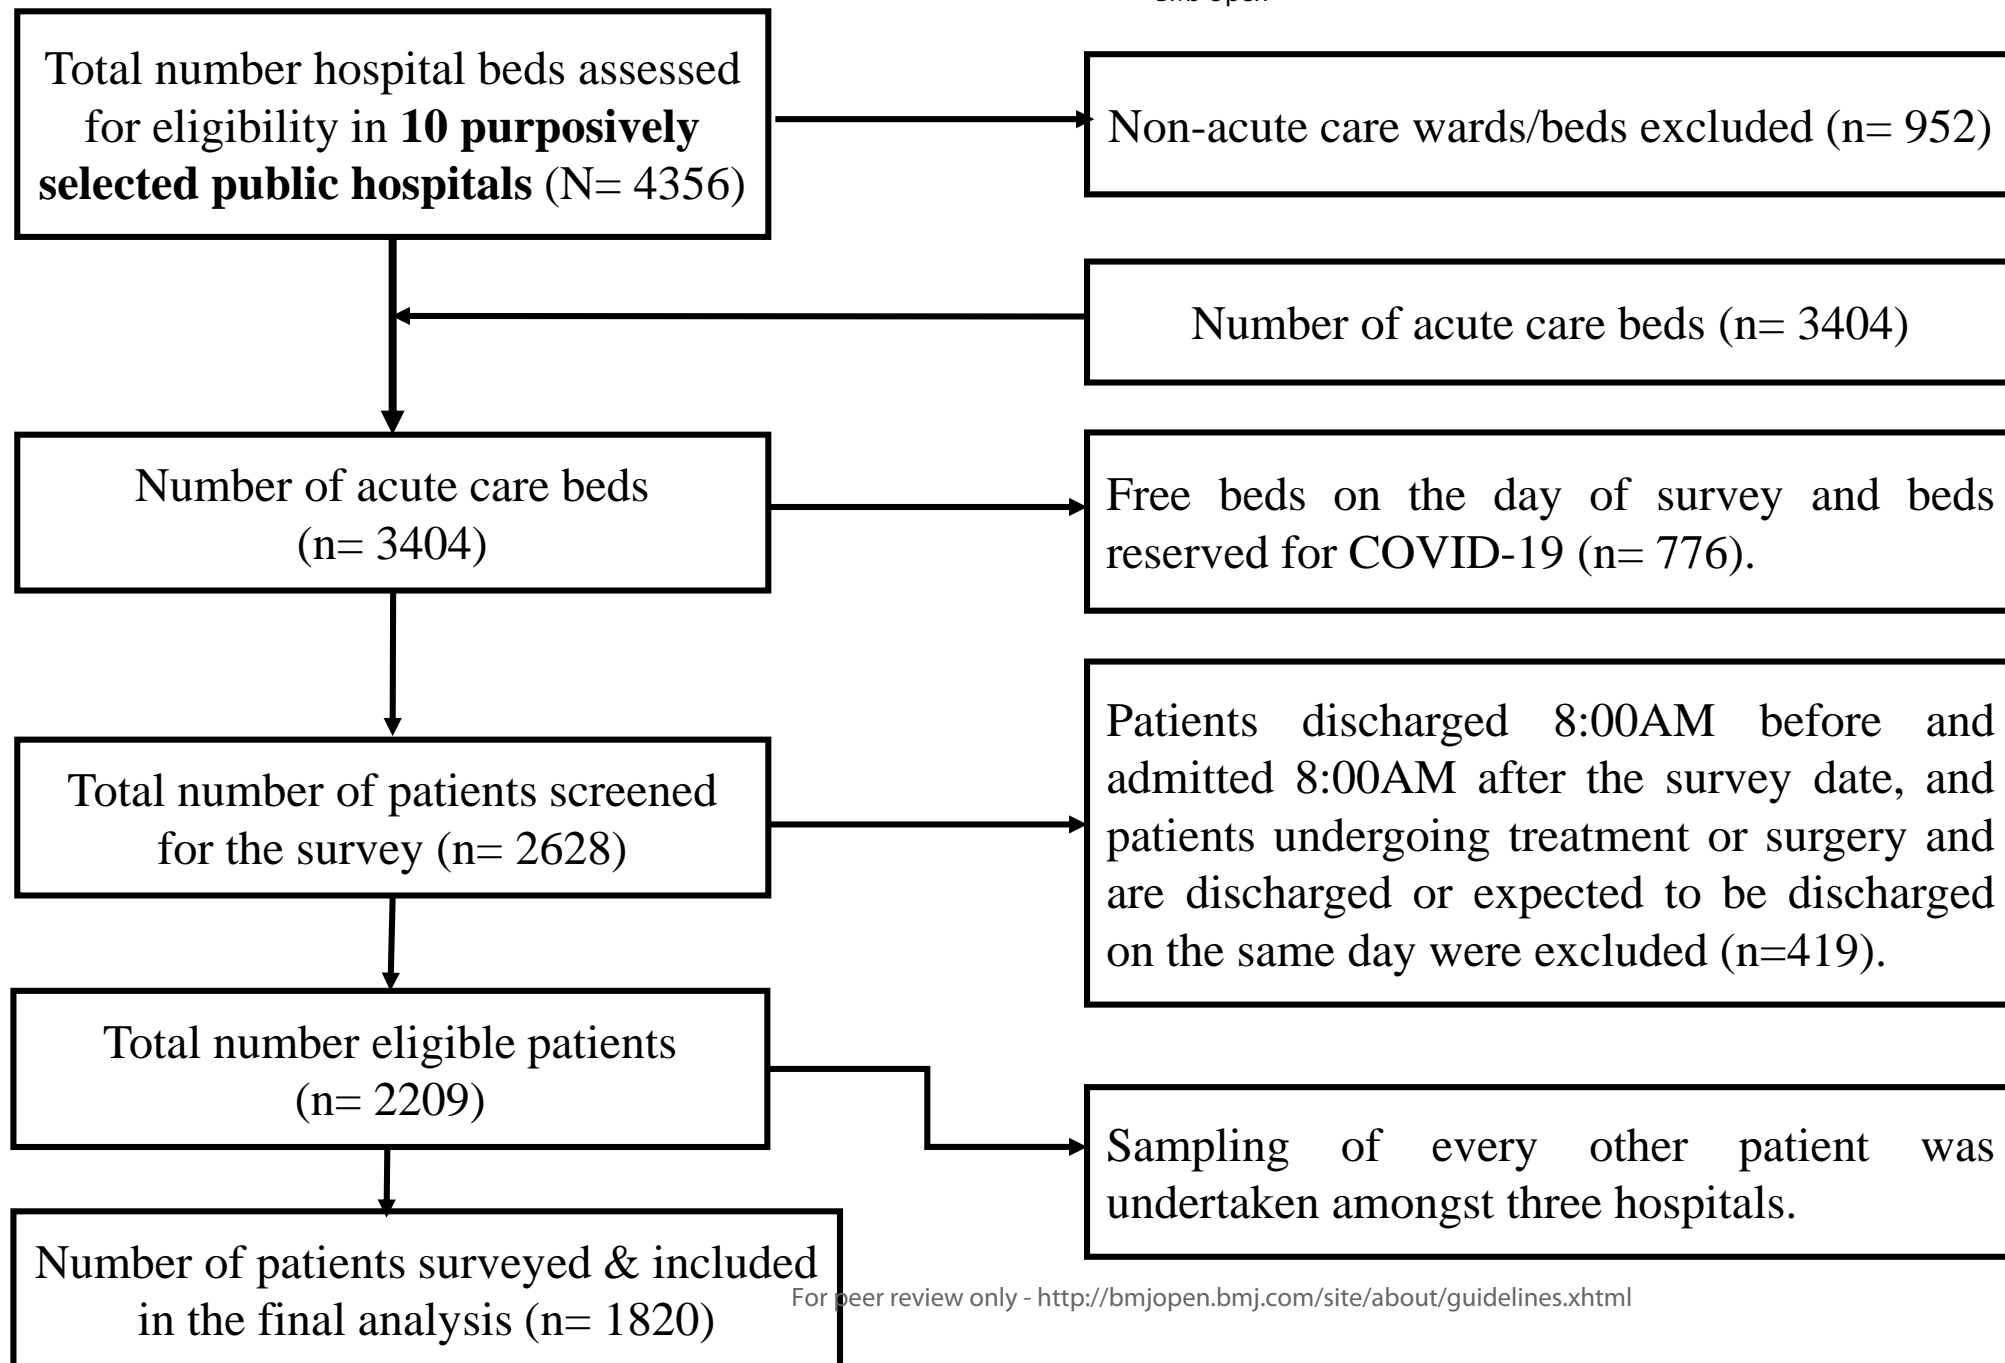

## Supplementary file

**Table 1: Ethiopia's healthcare system profile**

| S.N | Variable                                                                                                    | Response             |
|-----|-------------------------------------------------------------------------------------------------------------|----------------------|
| 1.  | ISO code of Ethiopia                                                                                        | ETH                  |
| 2.  | Total number of hospitals at any level (tertiary, secondary, primary and specialized) in the country.       | 439                  |
| 3.  | Number of public hospitals in the country.                                                                  | 353                  |
| 4.  | Estimated number of private hospitals in the country                                                        | 86                   |
| 5.  | Estimated number of tertiary level (university teaching and specialized hospital) hospitals in the country. | 25                   |
| 6.  | Number of secondary level (General) hospitals in the country.                                               | 58                   |
| 7.  | Estimated number of primary hospitals in the country.                                                       | 381                  |
| 8.  | Is Hospital grouping exist in the country                                                                   | No                   |
| 9.  | Hospital survey sampling strategy                                                                           | Convenience sampling |
| 10. | Number of hospitals for the survey                                                                          | <b>10</b>            |
| 11. | Does a national treatment guideline exist?                                                                  | Yes                  |
| 12. | Does facility-based treatment guidelines exist                                                              | No                   |
| 13. | Does a national hospital ASP exists                                                                         | Yes                  |

**Table 2: The 10 surveyed hospitals profile**

| S.N | Variable                                                                                  | Mean $\pm$ SD     | Median(Range)        |
|-----|-------------------------------------------------------------------------------------------|-------------------|----------------------|
| 1.  | Number of beds in the surveyed hospitals                                                  | 443 $\pm$ 164     | 410(223-700)         |
| 2.  | Number of acute care beds                                                                 | 349 $\pm$ 134     | 314(186-600)         |
| 3.  | Number of ICU beds                                                                        | 34 $\pm$ 24       | 32(6-82)             |
| 4.  | Number of high risk beds                                                                  | 22 $\pm$ 19       | 18(0-51)             |
| 5.  | Annual overall admissions in the hospitals in the previous physical year, i.e. 2012 E.C.# | 16471 $\pm$ 7405  | 13885 (7025-30456)   |
| 6.  | Overall patient days in the hospitals for the previous physical year i.e. 2012 E.C.*      | 94679 $\pm$ 45583 | 79254(48931-176,742) |
| 7.  | Average length of hospital stay in days                                                   | 6.53 $\pm$ 1.48   | 6.0(4.8-10.2)        |
| 8.  | Sum of the number of beds of the wards included in the survey (Total= 2927 beds)          | 293 $\pm$ 153     | 214(103-541)         |
| 9.  | Number of patients eligible for inclusion in the survey. (Total= 2209 patients)           | 240 $\pm$ 115     | 203(103-474)         |
| 10. | Number of patients included in the survey (Total= 1820).                                  | 182 $\pm$ 61      | 161(103-325)         |

#emergency admission over 24 hours was not included. \* **Patient days:** over all admission \* average length of hospital stay.

### Current and past medical history, January 7-29, 2021 G.C.

| Variable                                       |         | Number of patients | Percentage |
|------------------------------------------------|---------|--------------------|------------|
| <b>Current hospitalization malarial status</b> | Yes     | 33                 | 1.8        |
|                                                | No      | 1439               | 79.1       |
|                                                | Unknown | 348                | 19.1       |
| <b>Previous malarial treatment history</b>     | Yes     | 41                 | 2.3        |
|                                                | No      | 1517               | 83.3       |
|                                                | Unknown | 262                | 14.4       |
| <b>Active tuberculosis</b>                     | Yes     | 76                 | 4.2        |

|                                                           |         |      |      |
|-----------------------------------------------------------|---------|------|------|
|                                                           | No      | 1499 | 82.4 |
|                                                           | Unknown | 245  | 13.4 |
| <b>COPD</b>                                               | Yes     | 28   | 1.5  |
|                                                           | No      | 1792 | 98.5 |
| <b>Malnutrition</b>                                       | Yes     | 277  | 15.2 |
|                                                           | No      | 1543 | 84.8 |
| <b>McCabe Score</b>                                       | RF      | 86   | 4.7  |
|                                                           | UF      | 258  | 14.2 |
|                                                           | NF      | 1476 | 81.1 |
| <b>Referred from another hospital</b>                     |         | 501  | 27.5 |
| <b>Referred from another facility other than hospital</b> |         | 447  | 25.1 |
| <b>Hospitalization history within 90 days</b>             |         | 562  | 30.9 |

RF= Rapidly fatal, UF= Ultimately fatal, NF= Non-fatal, COPD= Chronic obstructive pulmonary disease, RVI= Retroviral infection



**Table 3: Existing surveyed hospitals capacity to promote rational use of antibiotics**

| Variable                                                                                                      | Yes, N(%) |
|---------------------------------------------------------------------------------------------------------------|-----------|
| <b>Hospital infrastructure</b>                                                                                |           |
| Functioning Drugs and Therapeutics Committee                                                                  | 8(80.0)   |
| Functioning Infection Prevention & Control Committee                                                          | 10(100.0) |
| Microbiological laboratory service                                                                            | 8(80.0)   |
| Availability of a formal organizational structure responsible for ASP                                         | 10(100.0) |
| A physician ASP leader                                                                                        | 10(100.0) |
| Availability of a ASP team                                                                                    | 7(70.0)   |
| Availability of functional ASP in the hospital                                                                | 0(0.0)    |
| Availability of pharmacist responsible for ensuring appropriate antibiotic use                                | 9(90.0)   |
| Incentive package for dedicated staff for ASP                                                                 | 0(0.0)    |
| IT support for ASP                                                                                            | 0(0.0)    |
| Availability of outpatient parenteral antibiotic therapy (OPAT) unit                                          | 0(0.0)    |
| <b>Policy and practice</b>                                                                                    |           |
| Availability of antibiotic formulary (including unrestricted and restricted antibiotics) updated continuously | 0(0.0)    |
| Antibiotic formulary based on the Essential Drug List                                                         | 0(0.0)    |
| Institutional antibiotic guideline                                                                            | 3(30.0)   |
| Institutional antibiotic guidelines based on local Antibiogram                                                | 1(10.0)   |

|                                                                                             |                                                                                                                                                                                                                                                                                  |                |
|---------------------------------------------------------------------------------------------|----------------------------------------------------------------------------------------------------------------------------------------------------------------------------------------------------------------------------------------------------------------------------------|----------------|
| A written policy that requires prescribers to document an indication in the medical records |                                                                                                                                                                                                                                                                                  | 2(20.0)        |
| Preauthorization policy                                                                     |                                                                                                                                                                                                                                                                                  | 1(10.0)        |
| Post-prescription review service                                                            |                                                                                                                                                                                                                                                                                  | 7(70.0)        |
| <b>Monitoring and feedback</b>                                                              |                                                                                                                                                                                                                                                                                  |                |
| Monitoring of antibiotics indications on medical record                                     |                                                                                                                                                                                                                                                                                  | 5(50.0)        |
| Monitoring of surgical antibiotic prophylaxis choice and duration                           |                                                                                                                                                                                                                                                                                  | 2(20.0)        |
| Results of antibiotic audits are communicated directly with prescribers                     |                                                                                                                                                                                                                                                                                  | 7(70.0)        |
| Monitor of antibiotic use                                                                   |                                                                                                                                                                                                                                                                                  | 1(10.0)        |
| Monitoring of antibiotic use by DDD or DOT                                                  |                                                                                                                                                                                                                                                                                  | 0(0.0)         |
| Antibiotic use reported by hospital activity denominator                                    |                                                                                                                                                                                                                                                                                  | 0(0.0)         |
| Annual report focused on ASP in the past year                                               |                                                                                                                                                                                                                                                                                  | 2(20.0)        |
| A cumulative antibiotic susceptibility report in the past year                              |                                                                                                                                                                                                                                                                                  | 3(30.0)        |
| A national antibiotic resistance surveillance program participation                         |                                                                                                                                                                                                                                                                                  | 4(40.0)        |
| A national antibiotic use surveillance program participation                                |                                                                                                                                                                                                                                                                                  | 0(0.0)         |
| Number of blood cultures done in the past year, N= 7- hospitals                             | Mean ± SD                                                                                                                                                                                                                                                                        | 2625 ± 3307    |
|                                                                                             | Median(Range)                                                                                                                                                                                                                                                                    | 1707(452-9860) |
| List of antibiotics out of stock at the facility during the survey period.                  | Cefepime 1g, Meropenam 1g and 0.5g, Piperacillin-Tazobactam 4.5g, Ciprofloxacin 0.4mg , ceftazidime 1gm, Metronidazole 0.5g and Gentamycin 80mg injections were stock out in all of the surveyed hospitals. Vancomycin 1g and 0.5g was also stock out at two surveyed hospitals. |                |

**Table 5: Antibiotics prescription and indication**

| Variable                                                                                                                           | Number | Percentage |
|------------------------------------------------------------------------------------------------------------------------------------|--------|------------|
| <b>Total number of antibiotics prescribed since admission</b>                                                                      | 3192   |            |
| <b>Number of antibiotics prescribed/ patient since admission: N= 1410 patients</b>                                                 |        |            |
| 1                                                                                                                                  | 379    | 26.9       |
| 2                                                                                                                                  | 632    | 44.8       |
| 3                                                                                                                                  | 203    | 14.3       |
| 4                                                                                                                                  | 117    | 8.3        |
| 5                                                                                                                                  | 42     | 3.0        |
| 6                                                                                                                                  | 19     | 1.3        |
| Others*                                                                                                                            | 18     | 1.2        |
| <b>Overall antibiotics prescribed on the day of survey</b>                                                                         | 2058   |            |
| <b>Number of antibiotics given/patient at a time of survey: N= 1162 patients</b>                                                   |        |            |
| 1                                                                                                                                  | 432    | 37.1       |
| 2                                                                                                                                  | 585    | 50.4       |
| 3                                                                                                                                  | 124    | 10.7       |
| 4                                                                                                                                  | 18     | 1.6        |
| 5                                                                                                                                  | 3      | 0.3        |
| <b>Route of administration: N= 2059 antibiotics</b>                                                                                |        |            |
| Oral                                                                                                                               | 201    | 9.8        |
| Parenteral                                                                                                                         | 1858   | 90.2       |
| <b>Antibiotics prescription note: N= 2059 antibiotics</b>                                                                          |        |            |
| Brand                                                                                                                              | 61     | 2.9        |
| Generic                                                                                                                            | 1998   | 97.1       |
| <b>Indication of antibiotics written on patient notes: N= 1162 patients</b>                                                        |        |            |
| No                                                                                                                                 | 51     | 4.4        |
| Yes                                                                                                                                | 1111   | 95.6       |
| <b>Antibiotics duration in days ( From time of initiation to survey date): Mean <math>\pm</math> SD: 7.72 <math>\pm</math> 7.9</b> |        |            |
| <b>Type of treatment**, N=866 patients</b>                                                                                         |        |            |
| Empiric                                                                                                                            | 837    | 96.7       |
| Definitive                                                                                                                         | 29     | 3.3        |
| <b>Guideline compliance</b>                                                                                                        |        |            |
| Yes                                                                                                                                | 637    | 54.8       |
| No                                                                                                                                 | 255    | 21.9       |
| Not assessable                                                                                                                     | 237    | 20.4       |
| No information                                                                                                                     | 33     | 2.8        |
| <b>Prescriber type</b>                                                                                                             |        |            |
| General practitioner                                                                                                               | 178    | 15.3       |
| Resident                                                                                                                           | 949    | 81.7       |
| Specialist                                                                                                                         | 35     | 3.0        |

**\*Others:** 7 antibiotics= 5 patients; 8 antibiotics=8 patients; 9 antibiotics=3 patients; 10 antibiotics= 1 patient; 12 antibiotics=1 patient; \*\*Is only for patients whose antibiotics indication is for HCAs and CAs

STROBE 2007 (v4) Statement—Checklist of items that should be included in reports of cross-sectional studies

| Section/Topic             | Item # | Recommendation                                                                                                                                                                       | Reported on page #    |
|---------------------------|--------|--------------------------------------------------------------------------------------------------------------------------------------------------------------------------------------|-----------------------|
| Title and abstract        | 1      | (a) Indicate the study’s design with a commonly used term in the title or the abstract                                                                                               | 1                     |
|                           |        | (b) Provide in the abstract an informative and balanced summary of what was done and what was found                                                                                  | 2                     |
| <b>Introduction</b>       |        |                                                                                                                                                                                      |                       |
| Background/rationale      | 2      | Explain the scientific background and rationale for the investigation being reported                                                                                                 | 3-4                   |
| Objectives                | 3      | State specific objectives, including any prespecified hypotheses                                                                                                                     | Last paragraph on 3/4 |
| <b>Methods</b>            |        |                                                                                                                                                                                      |                       |
| Study design              | 4      | Present key elements of study design early in the paper                                                                                                                              | 5                     |
| Setting                   | 5      | Describe the setting, locations, and relevant dates, including periods of recruitment, exposure, follow-up, and data collection                                                      | 5                     |
| Participants              | 6      | (a) Give the eligibility criteria, and the sources and methods of selection of participants                                                                                          | 5                     |
| Variables                 | 7      | Clearly define all outcomes, exposures, predictors, potential confounders, and effect modifiers. Give diagnostic criteria, if applicable                                             | 5                     |
| Data sources/ measurement | 8*     | For each variable of interest, give sources of data and details of methods of assessment (measurement). Describe comparability of assessment methods if there is more than one group | NA                    |
| Bias                      | 9      | Describe any efforts to address potential sources of bias                                                                                                                            | 6                     |
| Study size                | 10     | Explain how the study size was arrived at                                                                                                                                            | 6                     |
| Quantitative variables    | 11     | Explain how quantitative variables were handled in the analyses. If applicable, describe which groupings were chosen and why                                                         | 6                     |
| Statistical methods       | 12     | (a) Describe all statistical methods, including those used to control for confounding                                                                                                | 6                     |
|                           |        | (b) Describe any methods used to examine subgroups and interactions                                                                                                                  | 6                     |
|                           |        | (c) Explain how missing data were addressed                                                                                                                                          | 6                     |
|                           |        | (d) If applicable, describe analytical methods taking account of sampling strategy                                                                                                   | 6                     |
|                           |        | (e) Describe any sensitivity analyses                                                                                                                                                | 6                     |
| <b>Results</b>            |        |                                                                                                                                                                                      |                       |

|                          |     |                                                                                                                                                                                                              |           |
|--------------------------|-----|--------------------------------------------------------------------------------------------------------------------------------------------------------------------------------------------------------------|-----------|
| Participants             | 13* | (a) Report numbers of individuals at each stage of study—eg numbers potentially eligible, examined for eligibility, confirmed eligible, included in the study, completing follow-up, and analysed            |           |
|                          |     | (b) Give reasons for non-participation at each stage                                                                                                                                                         | NA        |
|                          |     | (c) Consider use of a flow diagram                                                                                                                                                                           | 6         |
| Descriptive data         | 14* | (a) Give characteristics of study participants (eg demographic, clinical, social) and information on exposures and potential confounders                                                                     | 7-8       |
|                          |     | (b) Indicate number of participants with missing data for each variable of interest                                                                                                                          | 7-8       |
| Outcome data             | 15* | Report numbers of outcome events or summary measures                                                                                                                                                         | 10 and 14 |
| Main results             | 16  | (a) Give unadjusted estimates and, if applicable, confounder-adjusted estimates and their precision (eg, 95% confidence interval). Make clear which confounders were adjusted for and why they were included | 10        |
|                          |     | (b) Report category boundaries when continuous variables were categorized                                                                                                                                    | 15-17     |
|                          |     | (c) If relevant, consider translating estimates of relative risk into absolute risk for a meaningful time period                                                                                             | NA        |
| Other analyses           | 17  | Report other analyses done—eg analyses of subgroups and interactions, and sensitivity analyses                                                                                                               | NA        |
| <b>Discussion</b>        |     |                                                                                                                                                                                                              |           |
| Key results              | 18  | Summarise key results with reference to study objectives                                                                                                                                                     | 18-20     |
| Limitations              | 19  | Discuss limitations of the study, taking into account sources of potential bias or imprecision. Discuss both direction and magnitude of any potential bias                                                   | 21        |
| Interpretation           | 20  | Give a cautious overall interpretation of results considering objectives, limitations, multiplicity of analyses, results from similar studies, and other relevant evidence                                   | 21        |
| Generalisability         | 21  | Discuss the generalisability (external validity) of the study results                                                                                                                                        | 21        |
| <b>Other information</b> |     |                                                                                                                                                                                                              |           |
| Funding                  | 22  | Give the source of funding and the role of the funders for the present study and, if applicable, for the original study on which the present article is based                                                | 22        |

\*Give information separately for cases and controls in case-control studies and, if applicable, for exposed and unexposed groups in cohort and cross-sectional studies.

**Note:** An Explanation and Elaboration article discusses each checklist item and gives methodological background and published examples of transparent reporting. The STROBE checklist is best used in conjunction with this article (freely available on the Web sites of PLoS Medicine at <http://www.plosmedicine.org/>, Annals of Internal Medicine at <http://www.annals.org/>, and Epidemiology at <http://www.epidem.com/>). Information on the STROBE Initiative is available at [www.strobe-statement.org](http://www.strobe-statement.org).

# BMJ Open

## A multicenter point prevalence survey of antibiotic use and healthcare associated infections in Ethiopian hospitals

|                                 |                                                                                                                                                                                                                                                                                                                                                                                                                                                                                                                                                                                                                                                                                                                                                                                                                                                                                                                                                                                                                                    |
|---------------------------------|------------------------------------------------------------------------------------------------------------------------------------------------------------------------------------------------------------------------------------------------------------------------------------------------------------------------------------------------------------------------------------------------------------------------------------------------------------------------------------------------------------------------------------------------------------------------------------------------------------------------------------------------------------------------------------------------------------------------------------------------------------------------------------------------------------------------------------------------------------------------------------------------------------------------------------------------------------------------------------------------------------------------------------|
| Journal:                        | <i>BMJ Open</i>                                                                                                                                                                                                                                                                                                                                                                                                                                                                                                                                                                                                                                                                                                                                                                                                                                                                                                                                                                                                                    |
| Manuscript ID                   | bmjopen-2021-054541.R2                                                                                                                                                                                                                                                                                                                                                                                                                                                                                                                                                                                                                                                                                                                                                                                                                                                                                                                                                                                                             |
| Article Type:                   | Original research                                                                                                                                                                                                                                                                                                                                                                                                                                                                                                                                                                                                                                                                                                                                                                                                                                                                                                                                                                                                                  |
| Date Submitted by the Author:   | 24-Jan-2022                                                                                                                                                                                                                                                                                                                                                                                                                                                                                                                                                                                                                                                                                                                                                                                                                                                                                                                                                                                                                        |
| Complete List of Authors:       | Fentie, Atalay; Addis Ababa University College of Health Sciences, School of Pharmacy, Department of Pharmacology and Clinical Pharmacy<br>Degefaw, Yidnekachew; Ethiopia Ministry of Health, Pharmaceuticals and Medical Equipment Directorate, Ministry of Health, Ethiopia<br>Asfaw, Getachew; Ethiopia Ministry of Health, Pharmaceuticals and Medical Equipment Directorate, Ministry of Health, Ethiopia<br>Shewarega, Wendosen ; Ethiopia Ministry of Health, Pharmaceuticals and Medical Equipment Directorate, Ministry of Health, Ethiopia<br>Woldearegay, Mengistab ; World Health Organization Ethiopia Office, Addis Ababa, Ethiopia, World Health Organization Ethiopia Office, Addis Ababa, Ethiopia<br>Abebe, Ephrem; Purdue University College of Pharmacy; Indiana University School of Medicine<br>Gebretekle, Gebremedhin ; University of Toronto Institute of Health Policy Management and Evaluation; University Health Network, Toronto<br>Health Economics and Technology Assessment (THETA) Collaborative |
| <b>Primary Subject Heading</b>: | Infectious diseases                                                                                                                                                                                                                                                                                                                                                                                                                                                                                                                                                                                                                                                                                                                                                                                                                                                                                                                                                                                                                |
| Secondary Subject Heading:      | Health services research, Health economics                                                                                                                                                                                                                                                                                                                                                                                                                                                                                                                                                                                                                                                                                                                                                                                                                                                                                                                                                                                         |
| Keywords:                       | INFECTIOUS DISEASES, Public health < INFECTIOUS DISEASES, Health policy < HEALTH SERVICES ADMINISTRATION & MANAGEMENT, Quality in health care < HEALTH SERVICES ADMINISTRATION & MANAGEMENT                                                                                                                                                                                                                                                                                                                                                                                                                                                                                                                                                                                                                                                                                                                                                                                                                                        |
|                                 |                                                                                                                                                                                                                                                                                                                                                                                                                                                                                                                                                                                                                                                                                                                                                                                                                                                                                                                                                                                                                                    |

SCHOLARONE™  
Manuscripts



I, the Submitting Author has the right to grant and does grant on behalf of all authors of the Work (as defined in the below author licence), an exclusive licence and/or a non-exclusive licence for contributions from authors who are: i) UK Crown employees; ii) where BMJ has agreed a CC-BY licence shall apply, and/or iii) in accordance with the terms applicable for US Federal Government officers or employees acting as part of their official duties; on a worldwide, perpetual, irrevocable, royalty-free basis to BMJ Publishing Group Ltd ("BMJ") its licensees and where the relevant Journal is co-owned by BMJ to the co-owners of the Journal, to publish the Work in this journal and any other BMJ products and to exploit all rights, as set out in our [licence](#).

The Submitting Author accepts and understands that any supply made under these terms is made by BMJ to the Submitting Author unless you are acting as an employee on behalf of your employer or a postgraduate student of an affiliated institution which is paying any applicable article publishing charge ("APC") for Open Access articles. Where the Submitting Author wishes to make the Work available on an Open Access basis (and intends to pay the relevant APC), the terms of reuse of such Open Access shall be governed by a Creative Commons licence – details of these licences and which [Creative Commons](#) licence will apply to this Work are set out in our licence referred to above.

Other than as permitted in any relevant BMJ Author's Self Archiving Policies, I confirm this Work has not been accepted for publication elsewhere, is not being considered for publication elsewhere and does not duplicate material already published. I confirm all authors consent to publication of this Work and authorise the granting of this licence.

# A multicenter point prevalence survey of antibiotic use and healthcare associated infections in Ethiopian hospitals

Atalay Mulu Fentie<sup>1\*</sup>, Yidnekachew Degefaw<sup>2</sup>, Getachew Asfaw<sup>2</sup>, Wendosen Shewarega<sup>2</sup>, Mengistab Woldearegay<sup>3</sup>, Ephrem Abebe<sup>4,5†</sup>, Gebremedhin Beedemariam Gebretekle<sup>6,7†</sup>

†joint senior authors, \*Primary and corresponding author

<sup>1</sup>Addis Ababa University, College of Health Sciences, School of Pharmacy, Department of Pharmacology and Clinical Pharmacy, Ethiopia

<sup>2</sup>Pharmaceuticals and Medical Equipment Directorate, Ministry of Health, Ethiopia

<sup>3</sup>World Health Organization Ethiopia Office, Addis Ababa, Ethiopia

<sup>4</sup>Purdue University, College of Pharmacy, West Lafayette, IN, USA

<sup>5</sup>Indiana University, School of Medicine, Indianapolis, IN, USA

<sup>6</sup>University of Toronto, Institute of Health Policy Management and Evaluation, Canada

<sup>7</sup>University Health Network, Toronto Health Economics and Technology Assessment (THETA) Collaborative, Canada

## \*Correspondence author

Atalay Mulu Fentie

Clinical and Pharmacology Department, School of Pharmacy, College of Health Sciences, Addis Ababa University, Ethiopia.

P.O.Box: 1176

Telephone: +251923295462

Email: [atalay.mulu@aau.edu.et](mailto:atalay.mulu@aau.edu.et)

**Word Count (Abstract):** 299

**Word Count (manuscript text):** 3,460

Tables: **05**

Figure: **01**

**Keywords:** Antimicrobial resistance, AMR, Antimicrobial stewardship, Antibiotic, Ethiopia, Healthcare associated infection, HCAI, Point prevalence survey



## Abstract

**Objective:** Effective antimicrobial containment strategies such as Antimicrobial Stewardship programs (ASP) require comprehensive data on antibiotics use which is scarce in Ethiopia. This study sought to assess antibiotics use and healthcare associated infections (HCAIs) in Ethiopian public hospitals.

**Design:** We conducted a cross-sectional study using the WHO point-prevalence survey protocol for systemic antibiotics use and HCAIs for low- and middle-income countries.

**Setting:** The study was conducted among 10 public hospitals in 2021.

**Participants:** All patients admitted to adult and pediatric inpatient and emergency wards before or at 8:00AM on the survey date were enrolled.

**Outcome measure:** The primary outcome measures were the prevalence of antibiotic use, HCAIs, and the hospitals' readiness to implement ASP.

**Results:** Data were collected from 1,820 patient records. None of the surveyed hospitals had functional ASP. The common indication for antibiotics was for HCAIs (40.3%). Pneumonia was the most common bacterial infection (28.6%) followed by clinical sepsis (17.8%). Most treatments were empiric (96.7%) and the overall prevalence of antibiotic use was 63.8% with antibiotics prescription per patient ratio of 1.77. Ceftriaxone was the most commonly prescribed antibiotic (30.4%) followed by metronidazole (15.4%). Age, having HIV infection, ward type, type of hospital, catheterization and intubation history had significant association with antibiotic use. Patients who were treated in pediatric surgical wards were about four times more likely to be on antibiotics compared to patients treated at an adult emergency ward. Patients on urinary catheter (AOR:2.74,95%CI:2.04,3.68) and intubation device (AOR=2.62,95%CI:1.02,6.76) were more likely to be on antibiotics than their non-intubated/non-catheterized counterparts. Patients treated at secondary-level hospitals had 0.34 times lower odds of being on antibiotics compared to those in tertiary hospitals.

**Conclusions:** Antibiotic use across the surveyed hospitals was common and most were empiric which has both practical and policy implications for strengthening ASP and promoting rational antibiotics use.

## Strengths and limitations of the study

- This is the first multicenter point prevalence survey in Ethiopia using the standardized WHO tool, thus allowing cross-country comparisons.
- The findings are valuable in strengthening the implementation of antimicrobial stewardship programs and can be used to guide future studies in Ethiopia and other low- and middle-income countries.
- The findings may have limited generalizability given the study's focus on selected secondary and tertiary public hospitals of Ethiopia.
- Surgical prophylaxis may have been switched to empiric treatment without documentation, potentially inflating rate of prolonged prophylactic antibiotic use and underestimating rate of healthcare associated infection.

## Introduction

Since their discovery, antimicrobials have saved millions of lives, substantially reduced disease burden, improved patients' quality of life, and helped increase life expectancy [1]. However, Antimicrobial Resistance (AMR) is becoming a growing threat to the health of humans, animals, and the environment [2]. Every year, more than 700,000 deaths are attributable to AMR and, unless urgent measures are taken, AMR will lead to 10 million deaths and would cost the global economy up to US\$ 100 trillion by 2050. It is also predicted that AMR will disproportionately affect low- and middle-income countries (LMICs) [3]. Hence, containing and controlling AMR demands multi-sectoral collaboration and coordinated efforts across diverse sectors [4].

Although AMR is a complex problem with many interrelated contributors, the key drivers to the emergence of AMR are misuse and overuse of antimicrobials [5,6]. There is a strong correlation between antibiotic consumption and the emergence of resistant microbes [7–10]. To address this issue, the World Health Organization (WHO) has developed a Global Action Plan (GAP)[6], which includes a standardized point prevalence survey (PPS) methodology to guide optimization of antimicrobial use and AMR containment [11].

Prior studies from Ethiopia have shown widespread misuse and overuse of antibiotics [12–14] as well as emergence of microbes that are resistant against locally available antibiotics including carbapenems [15,16]. Responding to this global health priority, the government of Ethiopia adopted the GAP and implemented strategies, including Antimicrobial Stewardship Program (ASP), to prevent and contain AMR. However, a general picture of antibiotic use, prevalence of HCAs, and quality of prescribing at a national level is lacking [11]. Hence, this multicenter PPS survey aimed to collect baseline information about antibiotic use, prevalence of HCAs, distribution of these infections according to infection site and pathogen, and quality of antibiotic prescribing among selected public hospitals in Ethiopia.

## Methods

### Study design and setting

A multi-center cross-sectional study was conducted in Ethiopian public hospitals in January 2021. We adopted the WHO methodology for PPS of HCAs and systemic antibiotic use for LMICs Version 1.1[11]. Ethiopia has a three-tier public healthcare system that broadly classifies its facilities as primary, secondary and tertiary level service providers. At the time of this survey, the estimated number of hospitals in Ethiopia was about 464 at any level (378 public, 86 private) of which 25 were tertiary, 58 secondary, and 381 primary hospitals. As part of its strategic initiatives, the Ethiopian Ministry of Health identified selected secondary and tertiary public hospitals to serve as the first cohort of facilities that will implement new ASP or strengthen existing programs. In alignment with the Ministry's programmatic priorities, we have included five secondary and five tertiary care level hospitals. The hospitals were selected based on their readiness to implement the antimicrobial stewardship program, location and catchment area of service (Supplementary file).

### Eligibility criteria

The inclusion criteria were first applied to the wards in 10 purposively selected hospitals, then to patients in the selected wards, and finally to the antibiotics prescribed and dispensed to those patients as per the WHO PPS methodology for LMICs Version 1.1[11]. We included all hospitalized patients with a complete medical record admitted in the following acute care wards before or at 08:00 AM on the day of the survey regardless of antibiotic treatment status: adult and pediatric medical, emergency, gynecology/obstetrics, surgery, intensive care unit (ICU) and oncology-hematology. Excluded patients included: those seen in outpatient departments, outpatient dialysis centers, patients who were discharged before 8:00 AM of the day of survey but remaining in wards while awaiting transportation, undergoing treatment or surgery and were discharged or expected to be discharged on the same day, and patients receiving outpatient parenteral antibiotic therapy.

We included only oral and parenteral antibiotics when the patient was on active antibiotic therapy at 08:00 AM on the day of the survey. For instance, if a patient was on treatment

1  
2  
3 with antibiotic-A at 08:00 AM on the day of the survey but the treatment was changed to  
4 antibiotic-B at 10:00 AM, then only antibiotic-A was reported.  
5  
6  
7

## 8 **Outcome variables**

9

10 The outcome variables were prevalence of antibiotic use and HCAs among hospitalized  
11 patients and existence of functional ASP. We considered functional ASP when hospitals had  
12 been providing either prospective audit and feedback or preauthorization and/or formulary  
13 restriction. The independent variables were types of the hospital and ward, patients' socio-  
14 demographics, clinical and treatment related characteristics.  
15  
16  
17  
18

## 19 **Sample size determination and sampling technique**

20

21 For hospitals with <500 bed capacity, all eligible participants were surveyed. For those with  
22 500-800 bed capacity, every other patient was surveyed following an alphabetical listing of  
23 all eligible in-patients on the day of data collection. The next available record was included  
24 if a selected patient or medical record was not available. A consistent approach was  
25 employed across wards to ensure fidelity to predefined study procedures. Altogether, 2,209  
26 eligible patients were admitted during the survey period, and a total of 1,820 patients were  
27 included in the survey and final data analyses. As per the WHO PPS methodology, 389  
28 patients were excluded from the survey because they were either (i) undergoing treatment  
29 or surgery and were discharged or expected to be discharged on the same day, or (ii)  
30 admitted to the ward after 08:00 AM or discharged before 8:00 AM of the survey date (Figure  
31 1).  
32  
33  
34  
35  
36  
37  
38  
39  
40  
41  
42  
43

## 44 **Data collection and management**

45

46 A total of 100 patients, 10 from each of the participating hospitals, were used to pilot test the  
47 survey instrument. Trained data collectors fielded the survey instrument (one ASP  
48 chair/secretary and two clinical pharmacists per hospital). Data quality was assured through  
49 the implementation of a field manual guiding data collectors, regular supervision, and daily  
50 checks on data completeness, accuracy, and clarity. A validation workshop was also  
51  
52  
53  
54  
55  
56  
57

1  
2  
3 conducted to review findings with infectious disease specialists, data collectors, and other  
4 key stakeholders from the surveyed hospitals and the Ethiopian Ministry of Health.  
5  
6

### 7 **Patient and public involvement**

8  
9  
10 The survey was designed for public health surveillance purposes; it was non-experimental,  
11 did not involve any patient examination nor did it introduce interventions. There was no  
12 direct patient and public involvement in the design, recruitment and conduct of the study.  
13 Collected data were de-identified during data collection and it can therefore be considered  
14 to be a minimal risk study. All the data were extracted from the respective patient's medical  
15 records. Procedures for data collection, data management, analysis and interpretation were  
16 in accordance with the ethical and data safety regulations of the country.  
17  
18  
19  
20  
21  
22

### 23 **Data analysis and interpretation**

24  
25  
26 Data were analyzed using SPSS version 26. Descriptive analyses such as frequency and  
27 percentage were used to summarize the data. A multivariable logistic regression analysis  
28 was used to explore factors affecting antimicrobial use. During univariate analysis, all  
29 variables with  $p < 0.25$  and other clinically significant variables (e.g. length of hospital stay  
30 and within 90 days hospitalization history) were included for multivariable logistic  
31 regression model. A  $p$ -value of  $<0.05$  was considered statistically significant.  
32  
33  
34  
35  
36  
37  
38  
39  
40  
41  
42  
43  
44  
45  
46  
47  
48  
49  
50  
51  
52  
53  
54  
55  
56  
57

## Results

### Demographic characteristics of patients

The mean age of patients was  $27.7 \pm 22.1$  years and the majority (690, 37.9%) of patients were in the age group of 18-39 years. There were about 90 preterm babies. Out of the 1820 patients included in the survey, a large proportion of them were from adult medical (340, 18.7%), adult surgical (330, 18.1%), and obstetrics/gynecology (309, 17.0%) wards. Five hundred one (27.5%) patients were found to be transferred from other hospitals and 562 (30.9%) had a previous history of hospitalization in the last 90 days. Moreover, 194 (10.7%) of the patients had HIV infection, 76 (4.2%) had active tuberculosis, and 277 (15.2%) of patients were malnourished. A peripheral vascular catheter was secured in a significant number of patients (1535, 84.3%) (Table 1).

**Table 1: Characteristics of patients**

| Variable, N= 1820                         | N(%)      |
|-------------------------------------------|-----------|
| Sex                                       |           |
| Male                                      | 848(46.6) |
| Female                                    | 972(53.4) |
| Age in years                              |           |
| 0-17                                      | 616(33.8) |
| 18 – 39                                   | 690(37.9) |
| 40-64                                     | 371(20.4) |
| ≥ 65                                      | 143(7.9)  |
| Type of preterm for pre-term babies, N=90 |           |
| Late preterm                              | 39(43.3)  |
| Moderate preterm                          | 26(28.9)  |
| Very preterm                              | 24(26.7)  |
| Extremely preterm                         | 1(0.1)    |
| Ward/unit type                            |           |
| Adult medical ward                        | 340(18.7) |
| Adult surgical ward                       | 330(18.1) |
| Obstetrics/Gynecology ward                | 309(17.0) |
| Neonatal intensive care unit              | 184(10.1) |
| Adult emergency ward                      | 181(9.9)  |
| Pediatric medical ward                    | 146(8.0)  |
| Pediatric emergency ward                  | 120(6.6)  |
| Adult intensive care unit                 | 57(3.1)   |

|                                                                                |            |
|--------------------------------------------------------------------------------|------------|
| Pediatric surgical ward                                                        | 56(3.1)    |
| Pediatric high risk wards                                                      | 42(2.3)    |
| Adult high risk wards                                                          | 42(2.3)    |
| Pediatric intensive care unit                                                  | 13(0.7)    |
| Current hospitalization malarial status                                        |            |
| Yes                                                                            | 33(1.8)    |
| No                                                                             | 1439(79.1) |
| Unknown                                                                        | 348(19.1)  |
| Previous malarial treatment history                                            |            |
| Yes                                                                            | 41(2.3)    |
| No                                                                             | 1517(83.3) |
| Unknown                                                                        | 262(14.4)  |
| Active tuberculosis                                                            |            |
| Yes                                                                            | 76(4.2)    |
| No                                                                             | 1499(82.4) |
| Unknown                                                                        | 245(13.4)  |
| HIV infection status                                                           |            |
| Positive                                                                       | 194(10.7)  |
| Negative                                                                       | 1421(78.0) |
| Unknown                                                                        | 205(11.3)  |
| Patients having chronic obstructive pulmonary disease                          | 28(1.5)    |
| Patients with malnutrition                                                     | 277(15.2)  |
| Referred from another hospital                                                 | 501(27.5)  |
| Patients having hospitalization history within 90 days                         | 562(30.9)  |
| Patients with peripheral vascular catheter at 8:00 AM on the day of the survey | 1535(84.3) |
| Patients with urinary catheter at 8:00 AM on the day of the survey             | 403(22.1)  |
| Patients that were intubated at 8:00 AM on the day of the survey               | 71(3.9)    |

## Indications for antibiotics

From the 1,820 enrolled patients, there were about 1,191 (65.4%) antibiotic indications on the day of survey. The most common indication for antibiotics was HCAI (480, 40.3%). Eight hundred eighty-seven patients had a documented infection, the most common being



pneumonia (254, 28.6%) followed by clinical sepsis (158, 17.8%) and central nervous system infections (118, 13.3%) (Table 2).

**Table 2: Indication for antibiotics and types of infections**

| Variable                                                | N(%)                                                                  |           |
|---------------------------------------------------------|-----------------------------------------------------------------------|-----------|
| <b>Indication of antibiotics among 1191 indications</b> | Healthcare associated infections                                      | 480(40.3) |
|                                                         | Community-acquired infection                                          | 403(33.8) |
|                                                         | Surgical prophylaxis                                                  | 218(18.3) |
|                                                         | Medical prophylaxis                                                   | 86(7.2)   |
|                                                         | Unknown                                                               | 4(0.3)    |
| <b>Types of infection among the 887 patients</b>        | Pneumonia                                                             | 254(28.6) |
|                                                         | Clinical sepsis                                                       | 158(17.8) |
|                                                         | Central nervous system infection                                      | 118(13.3) |
|                                                         | Cellulitis, wound, deep soft tissue infection; not related to surgery | 61(6.9)   |
|                                                         | Symptomatic upper urinary tract infection                             | 59(6.7)   |
|                                                         | Gastro-intestinal infection                                           | 43(4.8)   |
|                                                         | Surgical site infection involving skin or soft tissue but not bone    | 39(4.4)   |
|                                                         | Intra-abdominal infection                                             | 35(3.9)   |
|                                                         | Gynecological infection                                               | 30(3.4)   |
|                                                         | Cardio-vascular infection                                             | 19(2.1)   |
| Others*                                                 | 71(8.0)                                                               |           |

\***Others:** Febrile neutropenia, sexually transmitted infection, Infection of ear, nose and throat, Cystic fibrosis, Symptomatic lower urinary tract infection, acute bronchitis and exacerbation of Asthma, Septic arthritis of surgical site, prostatitis, Systemic inflammatory response with no clear anatomical site, completely undefined site.

### Microbiological tests

Microbiological diagnostics for patients treated for HCAs and CAs were rarely ordered during the survey period (119, 13.6%). If ordered, most of them were blood samples alone

(53, 44.5%), followed by urine culture (26, 21.9%). Moreover, a high proportion of the results were unknown or not reported/collected (52, 43.7%). Out of 41 isolated microorganisms, about two-thirds (28, 68.3%) were gram-negative bacteria. *Escherichia coli* (8, 19.5%) and *Klebsiella pneumoniae* (7, 17.1%) were the most commonly isolated microbes. About 21 resistant phenotypes were reported and most (13, 61.9%) were third-generation cephalosporin resistant Enterobacteriaceae followed by methicillin resistant *Staphylococcus aureus* (3, 14.3%) and carbapenem resistant Enterobacteriaceae (3, 14.3%) (Table 3).

**Table 3: Microbiological diagnostics and culture and sensitivity results**

| Variable                                                      | N(%)      |
|---------------------------------------------------------------|-----------|
| Sample collected for microbiological workup, N= 870 patients* |           |
| Yes                                                           | 119(13.6) |
| No                                                            | 693(79.7) |
| Unknown                                                       | 58(6.7)   |
| Specimen type, N=119 patients                                 |           |
| Blood                                                         | 53(44.5)  |
| Urine                                                         | 26(21.9)  |
| Cerebrospinal Fluid                                           | 13(10.9)  |
| Pus                                                           | 11(9.2)   |
| Blood and urine                                               | 8(6.7)    |
| Blood and Cerebrospinal fluid                                 | 6(5.1)    |
| Peritoneal fluid                                              | 2(1.7)    |
| Culture result, N=119 patients                                |           |
| Positive                                                      | 38(31.9)  |
| Negative                                                      | 29(24.4)  |
| Unknown                                                       | 52(43.7)  |
| Isolated microorganism, N=41                                  |           |
| Gram positive bacteria                                        | 13(31.7)  |
| Gram negative bacteria                                        | 28(68.3)  |
| Type of isolated bacteria, N=41**                             |           |
| <i>Escherichia coli</i>                                       | 8(19.5)   |
| <i>Klebsiella pneumoniae</i>                                  | 7(17.1)   |
| <i>Klebsiella oxytoca</i>                                     | 4(9.8)    |

|    |                                                             |          |
|----|-------------------------------------------------------------|----------|
| 1  |                                                             |          |
| 2  |                                                             |          |
| 3  | <i>Acinetobacter</i>                                        | 4(9.8)   |
| 4  | <i>Staphylococcus aureus</i>                                | 4(9.8)   |
| 5  | <i>Enterobacter aerogenes</i>                               | 3(7.3)   |
| 6  | <i>Enterococcus</i>                                         | 3(7.3)   |
| 7  | <i>Coagulase negative staphylococcus, contaminant</i>       | 3(7.3)   |
| 8  | Others#                                                     | 5(12.2)  |
| 9  |                                                             |          |
| 10 | Resistant phenotype, N=21                                   |          |
| 11 |                                                             |          |
| 12 |                                                             |          |
| 13 | Third-generation cephalosporin resistant Enterobacteriaceae | 13(61.9) |
| 14 | Methicillin resistant <i>Staphylococcus aureus</i>          | 3(14.3)  |
| 15 | Carbapenem resistant Enterobacteriaceae                     | 3(14.3)  |
| 16 | Carbapenem resistant <i>Pseudomonas aeruginosa</i>          | 1(4.8)   |
| 17 | Carbapenem resistant <i>Acinetobacter</i>                   | 1(4.8)   |
| 18 |                                                             |          |
| 19 |                                                             |          |
| 20 |                                                             |          |
| 21 |                                                             |          |
| 22 |                                                             |          |

\*only for those whose indication type is for healthcare associated infection and community acquired infection.

\*\*for one patient *Klebsiella oxytoca* from blood and *Klebsiella pneumoniae* from urine, from another patient *streptococcus* from blood and *Klebsiella Pneumoniae* from blood and another one *Klebsiella Pneumoniae* from urine and *Acinetobacter* from blood were isolated. #*Pseudomonas aeruginosa*, *Citrobacter*, Gram positive cocci, *Group A streptococcus*, *Group D streptococcus*.

## Readiness to implement antimicrobial stewardship program

All surveyed hospitals had functional infection prevention and control committee and only eight hospitals had functional Drugs and Therapeutics Committee. Although a defined organizational structure for ASP was present in all surveyed hospitals, a formal ASP team was only available in seven (70%) hospitals and none were functional during the survey period. None of the hospitals monitored antibiotic use per defined daily dose or days of therapy and hospital activity denominator. Microbiological services were available in eight of the surveyed hospitals, and the median number of blood cultures performed in the previous fiscal year 2019/2020 was 1,707(Inter-quartile range (IQR):680-2,786). Different classes of broad- and narrow-spectrum antibiotics were stocked out during the survey period (Supplementary file).

## Antibiotics use prevalence and indication

Of the 1,820 surveyed patients, 63.8% had at least one antibiotic prescription on the day of the survey. The prevalence of antibiotic use was higher in adult intensive care unit patients (49, 86.0%) followed by pediatric emergency (112, 76.7%) and pediatric medical wards (94, 78.3%) (Table 4).

On the day of the survey, 2,059 antibiotics were prescribed for 1,162 patients with antibiotics prescribing ratio of 1.77 per patient. More than half (585, 50.3%) patients were on two antibiotics. Most antibiotics were prescribed in their generic name (1998, 97.1%) and were administered parenterally (1858, 90.2%). The median duration of treatment from initiation to survey date was 5 days (IQR: 3-10 days). A significantly higher proportion of treatments were empiric (837, 96.7%). As per the WHO definition of guideline compliance[11], only 637 (54.8%) of the treatments were compliant with the national guideline (Supplementary file).

As shown in Table 4, the most widely prescribed antibiotics across all surveyed hospitals were ceftriaxone (626, 30.4%) followed by metronidazole (317, 15.4%), ampicillin (249, 12.1%) and vancomycin (217, 10.5%). Additionally, ceftriaxone (157, 54.7%) was the most widely prescribed antibiotic for surgical prophylaxis followed by metronidazole (64, 22.3%). A significantly higher proportion of patients (180, 82.6%) were on prolonged duration of antibiotics for surgical prophylaxis (defined as >24 hours use).

**Table 4: Proportion patients on antibiotics and types of antibiotics prescriptions**

| Antibiotics                                                              | N(%)       |
|--------------------------------------------------------------------------|------------|
| <b>Proportion of patients on antibiotics per surveyed wards, n= 1162</b> |            |
| Adult surgical ward                                                      | 219(66.4%) |
| Adult medical ward                                                       | 199(58.5%) |
| Obstetrics & Gynecology                                                  | 157(50.8%) |
| Neonatal intensive care unit                                             | 140(76.1%) |
| Pediatric medical ward                                                   | 112(76.7%) |
| Adult emergency ward                                                     | 97(53.6%)  |
| Pediatric emergency ward                                                 | 94(78.3%)  |
| Adult intensive care unit                                                | 49(86%)    |
| Pediatric surgical ward                                                  | 41(73.2%)  |

|                               |           |
|-------------------------------|-----------|
| Pediatric high risk wards     | 32(76.2%) |
| Adult high risk ward          | 13(31%)   |
| Pediatric Intensive Care Unit | 9(69.2%)  |

#### Types of antibiotics prescribed for therapeutic use, n= 2059

|                                |           |
|--------------------------------|-----------|
| Ceftriaxone                    | 626(30.4) |
| Metronidazole                  | 317(15.4) |
| Ampicillin                     | 249(12.1) |
| Vancomycin                     | 217(10.5) |
| Gentamycin                     | 178(8.6)  |
| Ceftazidime                    | 116(5.6)  |
| Trimethoprim/Sulphamethoxazole | 72(3.5)   |
| Cloxacillin                    | 49(2.4)   |
| Ciprofloxacin                  | 42(2.0)   |
| Cefepime                       | 40(1.9)   |
| Meropenam                      | 39(1.9)   |
| Azithromycin                   | 25(1.2)   |
| Others*                        | 89(4.3)   |

#### Type of antibiotics prescribed for surgical prophylaxis, n= 287

|               |           |
|---------------|-----------|
| Ceftriaxone   | 157(54.7) |
| Metronidazole | 64(22.3)  |
| Ampicillin    | 55(19.2)  |
| Cephalexin    | 4(1.4)    |
| Amoxicillin   | 3(1.0)    |
| Others **     | 4(1.4)    |

#### Dosage for surgical prophylaxis, n= 218 patients

|                                       |           |
|---------------------------------------|-----------|
| Single dose                           | 7(3.2)    |
| Multiple doses over 24 hours only     | 31(14.2)  |
| Multiple doses for more than 24 hours | 180(82.6) |

#### Ratio of antibiotics per surgical procedure

(number of antibiotics used for surgery/total number of patients who were on SP) =1.32

\*Amoxicillin=20; Cefotaxime=13; Amoxicillin-clavulanic acid=12; Cephalexin=9; Crystalline-penicillin= 6; Erythromycin= 6; Norfloxacin = 5; Benzanthine penicillin= 4; Clindamycin= 4; Doxycycline = 3; Chloramphenicol= 2; Clarithromycin = 1; Nitrofurantoin= 1; Cefixime = 1; Ampicillin-sulbactam = 1, \*\*Amoxicillin-clavulanate, Ciprofloxacin, Cloxacillin and Gentamycin.

#### Factors associated with antibiotic use

From the multivariable logistic regression analysis, age, ward type, hospital type, history of being catheterized, history of being intubated, and HIV infection status were significantly associated with being on antibiotics. Patients aged between 18-39 years (AOR= 0.61, 95%CI: 0.38,0.86) and 40-64 years old (AOR=0.55, 95%CI: 0.39, 0.93) had lower odds of being on antibiotics compared with 17 years old or younger patients. Moreover, patients treated in

pediatric medical and emergency wards were about four times more likely to be on antibiotics compared to patients in an adult emergency ward. The study also found that being on urinary catheter and intubation device had a significant association with antibiotics use status, where they were nearly three times more likely to be on antibiotics compared to non-catheterized and non-intubated counterparts (Table 5).

**Table 5: Univariate and multivariable binary logistic regression analysis of predictors of antibiotics use among the surveyed hospitals**

| Variables                                     | Patient on antibiotics |           | COR, 95%CI         | AOR, 95%CI         |
|-----------------------------------------------|------------------------|-----------|--------------------|--------------------|
|                                               | Yes, n(%)              | No, n(%)  |                    |                    |
| <b>Age in years</b>                           |                        |           |                    |                    |
| 0-17                                          | 460(39.6)              | 156(23.7) | 1.00               | 1.00               |
| 18-39                                         | 406(34.9)              | 284(43.6) | 0.49(0.38,0.61)**  | 0.61(0.38,0.86)*   |
| 40-64                                         | 211(18.2)              | 160(24.3) | 0.45(0.34, 0.59)*  | 0.55(0.39, 0.93)*  |
| ≥ 65                                          | 85(7.3)                | 58(8.8)   | 0.5(0.34, 0.73)**  | 1.45(0.31, 3.59)   |
| <b>Gender</b>                                 |                        |           |                    |                    |
| Female                                        | 584(50.3)              | 388(59.0) | 1.00               | 1.00               |
| Male                                          | 578(49.7)              | 270(41.0) | 1.42(1.17, 1.73)*  | 1.18(0.93, 1.49)   |
| <b>Ward type</b>                              |                        |           |                    |                    |
| Pediatric medical                             | 112(9.6)               | 34(5.2)   | 2.85(1.76, 4.62)*  | 3.78(1.81, 7.9)**  |
| Pediatric surgical                            | 41(3.5)                | 15(2.3)   | 2.37(1.22, 4.58)   | 2.31(0.96, 5.51)   |
| Pediatric high risk                           | 32(27.5)               | 10(1.5)   | 2.77(1.29, 5.97)   | 4.15(1.59, 10.8)*  |
| Pediatric ICU                                 | 9(0.8)                 | 4(0.6)    | 1.95(0.58, 6.56)   | 1.57(0.38, 6.50)   |
| Pediatric emergency                           | 94(8.1)                | 26(4.0)   | 3.13(1.86, 5.28)*  | 4.22(1.98, 9.02)** |
| Neonatal ICU                                  | 140(12.0)              | 44(6.7)   | 2.76(1.76, 4.31)*  | 3.27(1.59, 6.67)*  |
| Adult medical                                 | 199(17.1)              | 141(21.4) | 1.22(0.85, 1.76)   | 1.31(0.89, 1.92)   |
| Adult surgical                                | 219(18.8)              | 111(16.9) | 1.71(1.18, 2.48)   | 2.00(1.36, 2.95)** |
| Adult high risk                               | 13(1.1)                | 29(4.4)   | 0.39(0.19, 0.79)   | 0.45(0.22, 0.96)*  |
| Adult ICU                                     | 49(4.2)                | 8(1.2)    | 5.30(2.38, 11.83)* | 2.68(1.05, 6.88)   |
| Gynecology/Obstetrics                         | 157(13.5)              | 152(23.1) | 0.89(0.62, 1.29)   | 0.83(0.54, 1.27)   |
| Adult emergency                               | 97(8.3)                | 84(12.8)  | 1.00               | 1.00               |
| <b>Urinary catheterization status</b>         |                        |           |                    |                    |
| No                                            | 846(72.8)              | 571(86.8) | 1.00               | 1.00               |
| Yes                                           | 316(27.2)              | 87(13.2)  | 2.45(1.89, 3.18)*  | 2.74(2.04, 3.68)*  |
| <b>Intubation status</b>                      |                        |           |                    |                    |
| No                                            | 1098(94.5)             | 650(98.8) | 1.00               | 1.00               |
| Yes                                           | 63(5.5)                | 8(1.2)    | 4.66(2.22, 9.79)*  | 2.62(1.02, 6.76)** |
| <b>HIV infection status</b>                   |                        |           |                    |                    |
| Yes                                           | 161(13.9)              | 33(5.0)   | 1.00               | 1.00               |
| No                                            | 867(74.6)              | 554(84.2) | 0.32(0.22,0.47)**  | 0.19(0.13,0.30)**  |
| Unknown                                       | 134(11.5)              | 71(10.8)  | 0.39(0.24,0.62)**  | 0.24(0.15,0.40)**  |
| <b>Within 90 days hospitalization history</b> |                        |           |                    |                    |

1  
2  
3  
4  
5  
6  
7  
8  
9  
10  
11  
12  
13  
14  
15  
16  
17  
18  
19  
20  
21  
22  
23  
24  
25  
26  
27  
28  
29  
30  
31  
32  
33  
34  
35  
36  
37  
38  
39  
40  
41  
42  
43  
44  
45  
46  
47  
48  
49  
50  
51  
52  
53  
54  
55  
56  
57  
58  
59  
60

|                                          |           |           |                   |                   |
|------------------------------------------|-----------|-----------|-------------------|-------------------|
| Yes                                      | 366(31.5) | 196(29.8) | 1.00              | 1.00              |
| No                                       | 796(68.5) | 462(70.2) | 0.93(0.75, 1.14)  | 0.85(0.67, 1.06)  |
| <b>Length of hospitalization in days</b> |           |           | 0.998(0.99, 1.00) | 1.00(0.99, 1.01)  |
| <b>Hospital type</b>                     |           |           |                   |                   |
| Secondary care                           | 623(53.6) | 304(46.2) | 1.00              | 1.00              |
| Tertiary care                            | 539(46.4) | 354(53.8) | 0.74(0.61, 0.90)* | 0.66(0.53, 0.81)* |

\* $p < 0.05$ , \*\*statistically significant at  $p < 0.0001$ . AOR: Adjusted odds ratio; COR: Crude odds ratio. ICU: Intensive care unit, HIV: Human immune deficiency virus

For peer review only

## Discussion

Antimicrobial resistance is becoming a global threat exacting a major toll on human, animal, and environmental health [17–20]. Ethiopia, like many nations, has not been immune from the negative effects of AMR [16,21,22]. While there have been initiatives to address this pressing health challenge, the few national and institutional efforts have had limited success. Mounting an effective national response to combat AMR requires robust information on the scope of infections and antimicrobial agents being used in healthcare institutions. Using the WHO's standardized PPS methodology, this study assessed the burden of HCAs and antibiotic use in selected public hospitals of Ethiopia.

Similar to studies done elsewhere [13,23,24], the most common indication for antibiotics therapy was for HCAs (40.3%), with pneumonia and clinical sepsis accounting for the lion share of indications. This high burden of infections might be a reason for misuse and overuse of antibiotics, potentially straining the already resource constrained hospitals, patients, and family caregivers [13]. Hence, efforts to effectively treat, prevent, and reduce HCAs are needed. To achieve these, implementing interventions such as strengthening and integrating infection prevention and control practice, developing and enforcing the use of institution specific standard treatment guidelines, and providing in-service trainings are needed. Strengthening microbiology laboratories to guide definitive treatment is also invaluable towards the achievement of this goal.

Empiric prescribing for broad-spectrum antibiotics (96.7%) was a common finding across the surveyed hospitals, something that has been reported in studies from other LMIC [24–27]. This may have resulted from lack of- and poor utilization of microbiology services, as seen by the hospitals' limited use of culture and sensitivity tests. This also parallels the overuse of antibiotics in general (63.8%), consistent with findings from countries with similar economic contexts (use ranging from 70.6% to 80.1%) [24–27] but contrasting with those from HICs (27.1–50.3%) [23,28–30]. An internet-based PPS done across 53 countries (LMICs and HICs) has also reported higher antimicrobial use in LMICs compared to HICs [31].

A high prevalence of empiric antibiotics use in many LMICs compared to HICs [13,26,32] might be attributed to lack of a national and institutional antibiotic guideline and poor



1  
2  
3 diagnostic infrastructure which can promote empiric but also high rates of irrational  
4 antibiotic use. Although most of the surveyed hospitals had microbiological services, only  
5 one hospital developed institutional guideline as per the antibiogram data. This suggests  
6 poor utilization of microbiology services to guide empiric antibiotic use and highlights the  
7 missed opportunities in promoting rational antibiotic use [33]. Recently, a pharmacist-led  
8 ASP implemented in one of the tertiary care hospitals of Ethiopia was well received and  
9 shown to be beneficial [13]. Lessons from such programs should be leveraged to promote  
10 widespread adoption of ASP to decrease antibiotic consumption, save costs, and improve  
11 outcomes. Additionally, enhancing capacity of existing ASPs through leadership and  
12 governance support will be critical as these were identified to be deficient in the surveyed  
13 hospitals.

14  
15  
16  
17  
18  
19  
20  
21  
22  
23 In this study, there was also a substantial difference in the prevalence of antibiotics use  
24 across different levels of surveyed hospitals where a statistically significant higher antibiotic  
25 use was reported in tertiary care hospitals compared to secondary hospitals. There were  
26 also disparities with respect to the type of prescribed antibiotics compared to other studies.  
27 Similar to studies done in Pakistan [26] and Ethiopia [12,13,25], the most widely prescribed  
28 antibiotic was the third-generation cephalosporin, ceftriaxone (30.4%) which is included  
29 under the WHO watch category of Access, Watch and Reserve(AWaRe) classification of  
30 antibiotics [6]. In developed countries, however, the most commonly prescribed antibiotics  
31 were penicillins with  $\beta$ -lactamase inhibitors [23,31]. Nitroimidazoles were the most  
32 commonly prescribed antibiotics in Nigeria [8].

33  
34  
35  
36  
37  
38  
39  
40  
41  
42 Prolonged use of surgical prophylaxis (>24hours) was high in this study (82.6%), similar to  
43 studies from other LMICs (73% to 100%) [24,26,27,34–36]. The recommended duration of  
44 surgical prophylaxis is one day [37–39] since prolonging duration potentially increases the  
45 rate of AMR, side effects, and costs for both the patient and the hospital [40–42].  
46 Furthermore, average number of antibiotics prescribed per patient for surgical prophylaxis  
47 was 1.32 despite several studies and guidelines demonstrating the cost-effectiveness of  
48 single narrow-spectrum antibiotics, usually cefazolin [30,37,43–46]. However, in the current  
49 study, ceftriaxone (54.7%) was the widely prescribed antibiotic for surgical prophylaxis. The  
50 widespread use of broad-spectrum third-generation cephalosporins in our survey might be

1  
2  
3 due to unavailability of cefazolin in all of the surveyed hospitals. Hence, due to proven safety  
4 and efficacy of Cefazolin, it is time for Ethiopia to include it on the essential medicine list,  
5 ensure its availability, and develop guidelines to promote use of cefazolin or other narrow-  
6 spectrum antibiotics for surgical prophylaxis.  
7  
8  
9

10  
11 Our study has some limitations. First, the study only included purposely-selected tertiary  
12 and secondary hospitals. Hence, the findings may not be generalizable to all settings. Second,  
13 because this was a point prevalence survey (i.e., cross-sectional study), patients were not  
14 followed-up in time. As a result, it was not possible to measure outcomes that had a temporal  
15 element such as AMR, duration of antibiotic use and length of hospital stay. Third, some  
16 surgical prophylaxis orders might have been changed to empiric treatment for suspected  
17 infection without proper documentation reflecting such change. This would inflate the rate  
18 of prolonged surgical prophylaxis, but underestimate the true rate of HCAs. Fourth, the  
19 reported microbiology finding may not be representative of the hospital population as a  
20 whole and could overestimate rate of AMR. This is because microbiologic investigations are  
21 mostly conducted for patients with severe diseases and those who failed first-line therapy.  
22  
23  
24  
25  
26  
27  
28  
29  
30

31 Despite these limitations, the study is the first multicenter study in Ethiopia using a  
32 standardized PPS methodology from the WHO. The findings are based on large sample size  
33 and are robust enough to guide similar studies to be conducted in Ethiopia and other LMICs.  
34 Furthermore, the findings could aid policymakers and other concerned bodies in  
35 strengthening ASP, optimizing antibiotics use, and containing and preventing AMR.  
36  
37  
38  
39  
40  
41

## 42 **Conclusions**

43  
44 Similar to studies from other LMICs, there was widespread use of antibiotics and a high  
45 burden of HCAs. Moreover, prolonged use of broad-spectrum antibiotics was a common  
46 practice for surgical prophylaxis suggesting an important target for ASP intervention. Almost  
47 all treatments were empiric and hospitals should be further stimulated to regularly monitor  
48 antibiotic use and set local targets to optimize their use.  
49  
50  
51  
52  
53  
54  
55  
56  
57

## Abbreviations

**AMR:** Antimicrobial resistance; **ASP:** Antimicrobial stewardship program; **CAIs:** Community-acquired infections; **HCAIs:** Healthcare associated infections; **HICs:** High-income countries; **LMICs:** Low- and middle-income countries; **PPS:** Point prevalence survey

## Authors' contributions

**AMF:** prepared the draft manuscript; **YD and MW:** funding acquisition; **AMF, YD, GA, WS and MW:** research planning, conduct and organization of data collection; **AMF, YD, GA, WS, MW, EA and GBG:** supervision, visualization, conception, design, acquisition of data, analysis and interpretation of the results; **AMF, YD, WS, MW, GA, EA and GBG:** took part in revising it critically for important intellectual content. All authors gave final approval of the manuscript and agree to be accountable for all aspects of the work.

## Funding

This multicenter PPS of antibiotic use and HCAIs in selected hospitals was commissioned by the Ethiopian Federal Ministry of Health (EFMOH) with the financial and technical assistance of the WHO. Dr. Abebe received support through Grant Numbers, KL2TR002530 (B. Tucker Edmonds, PI), and UL1TR002529 (S. Moe and S. Wiehe, co-PIs) from the National Institutes of Health, National Center for Advancing Translational Sciences, Clinical and Translational Sciences Award.

## Ethical approval statement

Ethical approval was obtained from the Ethiopian Federal Ministry of Health (Approval ID: SOM/21/10/13). Before data collection, permission was sought from respective hospital administration. Collected data were de-identified during data collection and data were analyzed in aggregate to maintain confidentiality and anonymity of information.

**Competing interests:** None

### **Patient consent for publication**

Not required

### **Data availability statement**

All data relevant to the study are included in the article or uploaded as supplementary information.

### **Acknowledgments**

We express our gratitude for all hospitals for their invaluable assistance during our data collection. We also would like to extend our appreciation to the data collectors assigned from the hospitals as well as to all validation workshop participants for their insightful feedback.

## References

- 1 Kardos N, Demain AL. Penicillin: The medicine with the greatest impact on therapeutic outcomes. *Appl. Microbiol. Biotechnol.* 2011; **92**(4):677-87. doi:10.1007/s00253-011-3587-6
- 2 Lobanovska M, Pilla G. Penicillin's Discovery and Antibiotic Resistance: Lessons for the Future? *Yale J Biol Med.* 2017;**90**(1):135-145.
- 3 O'Neill J. Antimicrobial Resistance : Tackling a crisis for the health and wealth of nations. 2016. Available at: <https://wellcomecollection.org/works/rdpck35v>
- 4 The World Bank. Drug-resistant infections: A Threat to Our Economic Future. *World Bank Rep.* 2017. Available at: <https://openknowledge.worldbank.org/handle/10986/26707>
- 5 Michael CA, Dominey-Howes D, Labbate M. The antimicrobial resistance crisis: causes, consequences, and management. *Front Public Health.* 2014 ;**2**:145. doi:10.3389/fpubh.2014.00145.
- 6 World Health Organization. Global Action Plan on Antimicrobial Resistance. *Microbe Mag.* 2015;**10**:354–5. doi:10.1128/microbe.10.354.1
- 7 Centers for Disease Control and Prevention. Antibiotic Use in the United States. Progress and Opportunities. Atlanta, GA: US Department of Health and Human Services. CDC; 2017.
- 8 Abubakar U. Point-prevalence survey of hospital acquired infections in three acute care hospitals in Northern Nigeria. *Antimicrob Resist Infect Control.* 2020;**9**:1–7. doi:10.1186/s13756-020-00722-9
- 9 Ayukekbong JA, Ntemgwa M, Atabe AN. The threat of antimicrobial resistance in developing countries: Causes and control strategies. *Antimicrob Resist Infect Control.* 2017;**6**:1–8. doi:10.1186/s13756-017-0208-x
- 10 Mboya EA, Sanga LA, Ngocho JS. Irrational use of antibiotics in the moshi municipality

- 1  
2  
3 Northern Tanzania: A cross sectional study. *Pan Afr Med J.* 2018;**31**:1–10.  
4 doi:10.11604/pamj.2018.31.165.15991  
5  
6  
7  
8 11 World Health Organization. WHO Methodology for Point Prevalence Survey on  
9 Antibiotics Use in Hospitals. 2018;**Version 1**. Available at:  
10 <https://apps.who.int/iris/handle/10665/280063>.  
11  
12  
13 12 Alemkere G, Tenna A, Engidawork E. Antibiotic use practice and predictors of hospital  
14 outcome among patients with systemic bacterial infection: Identifying targets for  
15 antibiotic and health care resource stewardship. *PLoS One.* 2019; 14(2):e0212661.  
16 doi:10.1371/journal.pone.0212661  
17  
18  
19  
20  
21 22 Gebretekle GB, Haile Mariam D, Abebe Taye W, *et al.* Half of Prescribed Antibiotics Are  
23 Not Needed: A Pharmacist-Led Antimicrobial Stewardship Intervention and Clinical  
24 Outcomes in a Referral Hospital in Ethiopia. *Front Public Heal.* 2020; **8**:109.  
25 doi:10.3389/fpubh.2020.00109  
26  
27  
28  
29 30 14 Argaw, N.A., Shumbash, K.Z., Asfaw, A.A. *et al.* Assessment of surgical antimicrobial  
31 prophylaxis in Orthopaedics and Traumatology Surgical Unit of a Tertiary Care  
32 Teaching Hospital in Addis Ababa. *BMC Res Notes.* 2017; **10**:160 (2017). doi:  
33 <https://doi.org/10.1186/s13104-017-2475-2>  
34  
35  
36  
37 38 15 Abebe W, Alemayehu T, Kong L, *et al.* Alarming rates of drug-resistant Gram-negative  
39 bloodstream infections among hospitalized patients in Ethiopia: an urgent call to  
40 strengthen diagnostic bacteriology and antimicrobia. *28th Eur Congr Clin Microbiol*  
41 *Infect Dis.* 2018.  
42  
43  
44  
45 46 16 Alemayehu, T., Ali, M., Mitiku, E. *et al.* The burden of antimicrobial resistance at  
47 tertiary care hospital, southern Ethiopia: a three years' retrospective study. *BMC Infect*  
48 *Dis.* 2017; **19**:585 (2019). doi: <https://doi.org/10.1186/s12879-019-4210-1>.  
49  
50  
51 52 17 Mouiche, M.M.M., Moffo, F., Akoachere, JF.T.K. *et al.* Antimicrobial resistance from a  
53 one health perspective in Cameroon: a systematic review and meta-analysis. *BMC*  
54 *Public Health.* 2019; **19**:1135 (2019). doi: <https://doi.org/10.1186/s12889-019->  
55  
56  
57

- 1  
2  
3 7450-5  
4  
5  
6 18 Nellums LB, Thompson H, Holmes A, *et al.* Antimicrobial resistance among migrants in  
7 Europe: a systematic review and meta-analysis. *Lancet Infect Dis.* 2018;**18**:796–811.  
8 doi:10.1016/S1473-3099(18)30219-6  
9  
10  
11  
12 19 Aminov RI. A brief history of the antibiotic era: lessons learned and challenges for the  
13 future. *Front Microbiol.* 2010;**1**:134. doi: 10.3389/fmicb.2010.00134.  
14  
15  
16 20 Midega J. Estimating the global burden of antimicrobial resistance: Reflections on  
17 current methods and data needs. *Wellcome Open Res.* 2020;**5**:48.  
18 doi:10.12688/wellcomeopenres.15680.1  
19  
20  
21 21 Muhie OA. Antibiotic Use and Resistance Pattern in Ethiopia: Systematic Review and  
22 Meta-Analysis. *Int J Microbiol.* 2019; **2019**: 2489063. doi: 10.1155/2019/2489063  
23  
24  
25  
26 22 Ibrahim RA, Teshale AM, Dinku SF, *et al.* Erratum: Antimicrobial resistance  
27 surveillance in Ethiopia: Implementation experiences and lessons learned. *Afr J Lab*  
28 *Med.* 2019;**8**:1–4. doi:10.4102/ajlm.v7i2.770  
29  
30  
31  
32 23 Frenette C, Sperlea D, German GJ, *et al.* The 2017 global point prevalence survey of  
33 antimicrobial consumption and resistance in Canadian hospitals. *Antimicrob Resist*  
34 *Infect Control.* 2020. **9**(104). doi:10.1186/s13756-020-00758-x  
35  
36  
37  
38 24 Anand Paramadhas BD, Tiroyakgosi C, Mpinda-Joseph P, *et al.* Point prevalence study  
39 of antimicrobial use among hospitals across Botswana; findings and implications.  
40 *Expert Rev Anti Infect Ther.* 2019;**17**:535–46. doi:10.1080/14787210.2019.1629288  
41  
42  
43  
44 25 Gutema G, Håkonsen H, Engidawork E, *et al.* Multiple challenges of antibiotic use in a  
45 large hospital in Ethiopia - A ward-specific study showing high rates of hospital-  
46 acquired infections and ineffective prophylaxis. *BMC Health Serv Res.* 2018.  
47 doi:10.1186/s12913-018-3107-9  
48  
49  
50  
51  
52 26 Saleem Z, Saeed H, Hassali MA, *et al.* Pattern of inappropriate antibiotic use among  
53 hospitalized patients in Pakistan: A longitudinal surveillance and implications.  
54  
55  
56  
57

- 1  
2  
3 *Antimicrob Resist Infect Control*. 2019. doi:10.1186/s13756-019-0649-5  
4  
5  
6 27 Abubakar U. Antibiotic use among hospitalized patients in northern Nigeria: A  
7 multicenter point-prevalence survey. *BMC Infect Dis*. 2020;**20**:1–9.  
8 doi:10.1186/s12879-020-4815-4  
9  
10  
11  
12 28 Ciofi Degli Atti ML, D'Amore C, Ceradini J, *et al*. Prevalence of antibiotic use in a tertiary  
13 care hospital in Italy, 2008-2016. *Ital J Pediatr*. 2019. doi:10.1186/s13052-019-0645-  
14 7  
15  
16  
17  
18 29 Sorensen H. Trends in U. S. Antibiotic Use. *Pew Charit Trust*. 2018:1–9.  
19  
20  
21 30 Vandael E, Latour K, Goossens H, *et al*. Point prevalence survey of antimicrobial use  
22 and healthcare-associated infections in Belgian acute care hospitals: Results of the  
23 Global-PPS and ECDC-PPS 2017. *Antimicrob Resist Infect Control*. 2020;**9**:1–13.  
24 doi:10.1186/s13756-019-0663-7  
25  
26  
27  
28  
29 31 Versporten A, Zarb P, Caniaux I, *et al*. Antimicrobial consumption and resistance in  
30 adult hospital inpatients in 53 countries: results of an internet-based global point  
31 prevalence survey. *Lancet Glob Heal*. 2018. doi:10.1016/S2214-109X(18)30186-4  
32  
33  
34  
35 32 Versporten A, Zarb P, Caniaux I, *et al*. Antimicrobial consumption and resistance in  
36 adult hospital inpatients in 53 countries: results of an internet-based global point  
37 prevalence survey. *Lancet Glob Heal*. 2018;**6**:e619–29. doi:10.1016/S2214-  
38 109X(18)30186-4  
39  
40  
41  
42  
43 33 de With K, Allerberger F, Amann S, *et al*. Strategies to enhance rational use of  
44 antibiotics in hospital: a guideline by the German Society for Infectious Diseases.  
45 *Infection*: 2016;**44**:395–439. doi:10.1007/s15010-016-0885-z  
46  
47  
48  
49 34 Afriyie DK, Sefah IA, Sneddon J, *et al*. Antimicrobial point prevalence surveys in two  
50 Ghanaian hospitals: opportunities for antimicrobial stewardship. *JAC-Antimicrobial*  
51 *Resist*. 2020;**2**:1–9. doi:10.1093/jacamr/dlaa001  
52  
53  
54  
55 35 Horumpende PG, Mshana SE, Mouw EF, *et al*. Point prevalence survey of antimicrobial  
56  
57



- 1  
2  
3 use in three hospitals in North-Eastern Tanzania. *Antimicrob Resist Infect Control*.  
4 2020;**9**:1–6. doi:10.1186/s13756-020-00809-3  
5  
6  
7  
8 36 Van Der Sandt N, Schellack N, Mabope LA, *et al*. Surgical antimicrobial prophylaxis  
9 among pediatric patients in south africa comparing two healthcare settings. *Pediatr*  
10 *Infect Dis J*. 2019. doi:10.1097/INF.0000000000002072  
11  
12  
13 37 Berriós-Torres SI, Umscheid CA, Bratzler DW, *et al*. Centers for disease control and  
14 prevention guideline for the prevention of surgical site infection. *JAMA Surg*. 2017.  
15 doi:10.1001/jamasurg.2017.0904  
16  
17  
18  
19 38 Bratzler DW, Dellinger EP, Olsen KM, *et al*. Clinical practice guidelines for  
20 antimicrobial prophylaxis in surgery. *Surg Infect (Larchmt)*. 2013;**14**:73–156.  
21 doi:10.1089/sur.2013.9999  
22  
23  
24  
25 39 Jocum J. Surgical antibiotic prophylaxis: Are you doing it right? *South African J Anaesth*  
26 *Analg*. 2018;**24**:S49–53.  
27  
28  
29  
30 40 Roberts SA, Morris AJ. Surgical antibiotic prophylaxis: more is not better. *Lancet Infect*  
31 *Dis*. 2020;**20**:1110–1. doi:10.1016/S1473-3099(20)30290-5  
32  
33  
34 41 Bratzler DW, Dellinger EP, Olsen KM, *et al*. Balancing the Risks and Benefits of Surgical  
35 Prophylaxis Timing and Duration Do Matter. *Am J Heal Pharm*. 2013;**70**:195–283.  
36 doi:10.2146/ajhp120568  
37  
38  
39  
40 42 Branch-Elliman W, O'Brien W, Strymish J, *et al*. Association of Duration and Type of  
41 Surgical Prophylaxis with Antimicrobial-Associated Adverse Events. In: *JAMA Surgery*.  
42 2019. doi:10.1001/jamasurg.2019.0569  
43  
44  
45  
46 43 Pinto-Lopes R, Sousa-Pinto B, Azevedo LF. Single dose versus multiple dose of  
47 antibiotic prophylaxis in caesarean section: a systematic review and meta-analysis.  
48 *BJOG An Int. J. Obstet. Gynaecol*. 2017; **124**(4): doi:10.1111/1471-0528.14373  
49  
50  
51  
52 44 Slobogean GP, Kennedy SA, Davidson D, O'Brien PJ. Single- versus multiple-dose  
53 antibiotic prophylaxis in the surgical treatment of closed fractures: a meta-analysis. *J*  
54  
55  
56  
57

1  
2  
3 Orthop Trauma. 2008;**22**(4):264-9. doi: 10.1097/BOT.0b013e31816b7880. PMID:  
4 18404036.  
5

6  
7  
8 45 Ierano C, Nankervis JM, James R, Rajkhowa A, Peel T, Thursky K. Surgical antimicrobial  
9 prophylaxis. *Aust Prescr*. 2017;**40**(6):225-229. doi:10.18773/austprescr.2017.073  
10

11  
12 46 Bratzler DW, Dellinger EP, Olsen KM, et al. Clinical practice guidelines for  
13 antimicrobial prophylaxis in surgery. *Surg Infect (Larchmt)*. 2013;**14**(1):73-156. doi:  
14 10.1089/sur.2013.9999.  
15  
16  
17  
18  
19  
20  
21  
22  
23  
24  
25  
26  
27  
28  
29  
30  
31  
32  
33  
34  
35  
36  
37  
38  
39  
40  
41  
42  
43  
44  
45  
46  
47  
48  
49  
50  
51  
52  
53  
54  
55  
56  
57

1  
2  
3  
4  
5  
6  
7  
8  
9  
10  
11  
12  
13  
14  
15  
16  
17  
18  
19  
20  
21  
22  
23  
24  
25  
26  
27  
28  
29  
30  
31  
32  
33  
34  
35  
36  
37  
38  
39  
40  
41  
42  
43  
44  
45  
46  
47  
48  
49  
50  
51  
52  
53  
54  
55  
56  
57  
58  
59  
60

**Figure legend**

Figure 1: Diagrammatic scheme of study participant recruitment process

For peer review only

1  
2  
3  
4  
5  
6  
7  
8  
9  
10  
11  
12  
13  
14  
15  
16  
17  
18  
19  
20  
21  
22  
23  
24  
25  
26  
27  
28  
29  
30  
31  
32  
33  
34  
35  
36  
37  
38  
39  
40  
41

## Supplementary file

**Table 1: Ethiopia's healthcare system profile**

| S.N | Variable                                                                                                    | Response             |
|-----|-------------------------------------------------------------------------------------------------------------|----------------------|
| 1.  | ISO code of Ethiopia                                                                                        | ETH                  |
| 2.  | Total number of hospitals at any level (tertiary, secondary, primary and specialized) in the country.       | 464                  |
| 3.  | Number of public hospitals in the country.                                                                  | 378                  |
| 4.  | Estimated number of private hospitals in the country                                                        | 86                   |
| 5.  | Estimated number of tertiary level (university teaching and specialized hospital) hospitals in the country. | 25                   |
| 6.  | Number of secondary level (General) hospitals in the country.                                               | 58                   |
| 7.  | Estimated number of primary hospitals in the country.                                                       | 381                  |
| 8.  | Is Hospital grouping exist in the country                                                                   | No                   |
| 9.  | Hospital survey sampling strategy                                                                           | Convenience sampling |
| 10. | Number of hospitals for the survey                                                                          | <b>10</b>            |
| 11. | Does a national treatment guideline exist?                                                                  | Yes                  |
| 12. | Does facility-based treatment guidelines exist                                                              | No                   |
| 13. | Does a national hospital ASP exists                                                                         | Yes                  |

**Table 2: The 10 surveyed hospitals profile**

| S.N | Variable                                                                                  | Mean $\pm$ SD     | Median(Range)        |
|-----|-------------------------------------------------------------------------------------------|-------------------|----------------------|
| 1.  | Number of beds in the surveyed hospitals                                                  | 443 $\pm$ 164     | 410(223-700)         |
| 2.  | Number of acute care beds                                                                 | 349 $\pm$ 134     | 314(186-600)         |
| 3.  | Number of intensive care unit beds                                                        | 34 $\pm$ 24       | 32(6-82)             |
| 4.  | Number of high risk beds                                                                  | 22 $\pm$ 19       | 18(0-51)             |
| 5.  | Annual overall admissions in the hospitals in the previous physical year, i.e. 2012 E.C.# | 16471 $\pm$ 7405  | 13885 (7025-30456)   |
| 6.  | Overall patient days in the hospitals for the previous physical year i.e. 2012 E.C.*      | 94679 $\pm$ 45583 | 79254(48931-176,742) |
| 7.  | Average length of hospital stay in days                                                   | 6.53 $\pm$ 1.48   | 6.0(4.8-10.2)        |
| 8.  | Sum of the number of beds of the wards included in the survey (Total= 2628 beds)          | 293 $\pm$ 153     | 214(103-541)         |
| 9.  | Number of patients eligible for inclusion in the survey. (Total= 2209 patients)           | 240 $\pm$ 115     | 203(103-474)         |
| 10. | Number of patients included in the survey (Total= 1820).                                  | 182 $\pm$ 61      | 161(103-325)         |

#emergency admission over 24 hours was not included. \* **Patient days:** over all admission \* average length of hospital stay.

### Current and past medical history, January 7-29, 2021 G.C.

| Variable                                       |         | Number of patients | Percentage |
|------------------------------------------------|---------|--------------------|------------|
| <b>Current hospitalization malarial status</b> | Yes     | 33                 | 1.8        |
|                                                | No      | 1439               | 79.1       |
|                                                | Unknown | 348                | 19.1       |
| <b>Previous malarial treatment history</b>     | Yes     | 41                 | 2.3        |
|                                                | No      | 1517               | 83.3       |
|                                                | Unknown | 262                | 14.4       |
| <b>Active tuberculosis</b>                     | Yes     | 76                 | 4.2        |

|                                                           |         |      |      |
|-----------------------------------------------------------|---------|------|------|
|                                                           | No      | 1499 | 82.4 |
|                                                           | Unknown | 245  | 13.4 |
| <b>COPD</b>                                               | Yes     | 28   | 1.5  |
|                                                           | No      | 1792 | 98.5 |
| <b>Malnutrition</b>                                       | Yes     | 277  | 15.2 |
|                                                           | No      | 1543 | 84.8 |
| <b>McCabe Score</b>                                       | RF      | 86   | 4.7  |
|                                                           | UF      | 258  | 14.2 |
|                                                           | NF      | 1476 | 81.1 |
| <b>Referred from another hospital</b>                     |         | 501  | 27.5 |
| <b>Referred from another facility other than hospital</b> |         | 447  | 25.1 |
| <b>Hospitalization history within 90 days</b>             |         | 562  | 30.9 |

RF= Rapidly fatal, UF= Ultimately fatal, NF= Non-fatal, COPD= Chronic obstructive pulmonary disease, RVI= Retroviral infection

**Table 3: Existing surveyed hospitals capacity to promote rational use of antibiotics**

| Variable                                                                                                      | Yes, N(%) |
|---------------------------------------------------------------------------------------------------------------|-----------|
| <b>Hospital infrastructure</b>                                                                                |           |
| Functioning Drugs and Therapeutics Committee                                                                  | 8(80.0)   |
| Functioning Infection Prevention & Control Committee                                                          | 10(100.0) |
| Microbiological laboratory service                                                                            | 8(80.0)   |
| Availability of a formal organizational structure responsible for ASP                                         | 10(100.0) |
| A physician ASP leader                                                                                        | 10(100.0) |
| Availability of a ASP team                                                                                    | 7(70.0)   |
| Availability of functional ASP in the hospital                                                                | 0(0.0)    |
| Availability of pharmacist responsible for ensuring appropriate antibiotic use                                | 9(90.0)   |
| Incentive package for dedicated staff for ASP                                                                 | 0(0.0)    |
| IT support for ASP                                                                                            | 0(0.0)    |
| Availability of outpatient parenteral antibiotic therapy (OPAT) unit                                          | 0(0.0)    |
| <b>Policy and practice</b>                                                                                    |           |
| Availability of antibiotic formulary (including unrestricted and restricted antibiotics) updated continuously | 0(0.0)    |
| Antibiotic formulary based on the Essential Drug List                                                         | 0(0.0)    |
| Institutional antibiotic guideline                                                                            | 3(30.0)   |
| Institutional antibiotic guidelines based on local Antibiogram                                                | 1(10.0)   |



|                                                                                             |                                                                                                                                                                                                                                                                                  |                             |
|---------------------------------------------------------------------------------------------|----------------------------------------------------------------------------------------------------------------------------------------------------------------------------------------------------------------------------------------------------------------------------------|-----------------------------|
| A written policy that requires prescribers to document an indication in the medical records |                                                                                                                                                                                                                                                                                  | 2(20.0)                     |
| Preauthorization policy                                                                     |                                                                                                                                                                                                                                                                                  | 1(10.0)                     |
| Post-prescription review service                                                            |                                                                                                                                                                                                                                                                                  | 7(70.0)                     |
| <b>Monitoring and feedback</b>                                                              |                                                                                                                                                                                                                                                                                  |                             |
| Monitoring of antibiotics indications on medical record                                     |                                                                                                                                                                                                                                                                                  | 5(50.0)                     |
| Monitoring of surgical antibiotic prophylaxis choice and duration                           |                                                                                                                                                                                                                                                                                  | 2(20.0)                     |
| Results of antibiotic audits are communicated directly with prescribers                     |                                                                                                                                                                                                                                                                                  | 7(70.0)                     |
| Monitor of antibiotic use                                                                   |                                                                                                                                                                                                                                                                                  | 1(10.0)                     |
| Monitoring of antibiotic use by DDD or DOT                                                  |                                                                                                                                                                                                                                                                                  | 0(0.0)                      |
| Antibiotic use reported by hospital activity denominator                                    |                                                                                                                                                                                                                                                                                  | 0(0.0)                      |
| Annual report focused on ASP in the past year                                               |                                                                                                                                                                                                                                                                                  | 2(20.0)                     |
| A cumulative antibiotic susceptibility report in the past year                              |                                                                                                                                                                                                                                                                                  | 3(30.0)                     |
| A national antibiotic resistance surveillance program participation                         |                                                                                                                                                                                                                                                                                  | 4(40.0)                     |
| A national antibiotic use surveillance program participation                                |                                                                                                                                                                                                                                                                                  | 0(0.0)                      |
| Number of blood cultures done in the past year, N= 7- hospitals                             | Mean ± SD                                                                                                                                                                                                                                                                        | 2625 ± 3307                 |
|                                                                                             | Median(Range)<br>IQR                                                                                                                                                                                                                                                             | 1707(452-9860),<br>680-2786 |
| List of antibiotics out of stock at the facility during the survey period.                  | Cefepime 1g, Meropenam 1g and 0.5g, Piperacillin-Tazobactam 4.5g, Ciprofloxacin 0.4mg , ceftazidime 1gm, Metronidazole 0.5g and Gentamycin 80mg injections were stock out in all of the surveyed hospitals. Vancomycin 1g and 0.5g was also stock out at two surveyed hospitals. |                             |

**Table 5: Antibiotics prescription and indication**

| Variable                                                                                                     | Number | Percentage |
|--------------------------------------------------------------------------------------------------------------|--------|------------|
| <b>Total number of antibiotics prescribed since admission</b>                                                | 3192   |            |
| <b>Number of antibiotics prescribed/ patient since admission: N= 1410 patients</b>                           |        |            |
| 1                                                                                                            | 379    | 26.9       |
| 2                                                                                                            | 632    | 44.8       |
| 3                                                                                                            | 203    | 14.3       |
| 4                                                                                                            | 117    | 8.3        |
| 5                                                                                                            | 42     | 3.0        |
| 6                                                                                                            | 19     | 1.3        |
| Others*                                                                                                      | 18     | 1.2        |
| <b>Overall antibiotics prescribed on the day of survey</b>                                                   | 2058   |            |
| <b>Number of antibiotics given/patient at a time of survey: N= 1162 patients</b>                             |        |            |
| 1                                                                                                            | 432    | 37.1       |
| 2                                                                                                            | 585    | 50.4       |
| 3                                                                                                            | 124    | 10.7       |
| 4                                                                                                            | 18     | 1.6        |
| 5                                                                                                            | 3      | 0.3        |
| <b>Route of administration: N= 2059 antibiotics</b>                                                          |        |            |
| Oral                                                                                                         | 201    | 9.8        |
| Parenteral                                                                                                   | 1858   | 90.2       |
| <b>Antibiotics prescription note: N= 2059 antibiotics</b>                                                    |        |            |
| Brand                                                                                                        | 61     | 2.9        |
| Generic                                                                                                      | 1998   | 97.1       |
| <b>Indication of antibiotics written on patient notes: N= 1162 patients</b>                                  |        |            |
| No                                                                                                           | 51     | 4.4        |
| Yes                                                                                                          | 1111   | 95.6       |
| <b>Antibiotics duration in days ( From time of initiation to survey date):Median: 5 days; IQR: 3-10 days</b> |        |            |
| <b>Type of treatment**, N=866 patients</b>                                                                   |        |            |
| Empiric                                                                                                      | 837    | 96.7       |
| Definitive                                                                                                   | 29     | 3.3        |
| <b>Guideline compliance</b>                                                                                  |        |            |
| Yes                                                                                                          | 637    | 54.8       |
| No                                                                                                           | 255    | 21.9       |
| Not assessable                                                                                               | 237    | 20.4       |
| No information                                                                                               | 33     | 2.8        |
| <b>Prescriber type</b>                                                                                       |        |            |
| General practitioner                                                                                         | 178    | 15.3       |
| Resident                                                                                                     | 949    | 81.7       |
| Specialist                                                                                                   | 35     | 3.0        |

**\*Others:** 7 antibiotics= 5 patients; 8 antibiotics=8 patients; 9 antibiotics=3 patients; 10 antibiotics= 1 patient; 12 antibiotics=1 patient; \*\*Is only for patients whose antibiotics indication is for HCAs and CAs

**STROBE 2007 (v4) Statement—Checklist of items that should be included in reports of *cross-sectional studies***

| Section/Topic                | Item # | Recommendation                                                                                                                                                                       | Reported on page #    |
|------------------------------|--------|--------------------------------------------------------------------------------------------------------------------------------------------------------------------------------------|-----------------------|
| <b>Title and abstract</b>    | 1      | (a) Indicate the study’s design with a commonly used term in the title or the abstract                                                                                               | 1                     |
|                              |        | (b) Provide in the abstract an informative and balanced summary of what was done and what was found                                                                                  | 2                     |
| <b>Introduction</b>          |        |                                                                                                                                                                                      |                       |
| Background/rationale         | 2      | Explain the scientific background and rationale for the investigation being reported                                                                                                 | 3-4                   |
| Objectives                   | 3      | State specific objectives, including any prespecified hypotheses                                                                                                                     | Last paragraph on 3/4 |
| <b>Methods</b>               |        |                                                                                                                                                                                      |                       |
| Study design                 | 4      | Present key elements of study design early in the paper                                                                                                                              | 5                     |
| Setting                      | 5      | Describe the setting, locations, and relevant dates, including periods of recruitment, exposure, follow-up, and data collection                                                      | 5                     |
| Participants                 | 6      | (a) Give the eligibility criteria, and the sources and methods of selection of participants                                                                                          | 5                     |
| Variables                    | 7      | Clearly define all outcomes, exposures, predictors, potential confounders, and effect modifiers. Give diagnostic criteria, if applicable                                             | 5                     |
| Data sources/<br>measurement | 8*     | For each variable of interest, give sources of data and details of methods of assessment (measurement). Describe comparability of assessment methods if there is more than one group | NA                    |
| Bias                         | 9      | Describe any efforts to address potential sources of bias                                                                                                                            | 6                     |
| Study size                   | 10     | Explain how the study size was arrived at                                                                                                                                            | 6                     |
| Quantitative variables       | 11     | Explain how quantitative variables were handled in the analyses. If applicable, describe which groupings were chosen and why                                                         | 6                     |
| Statistical methods          | 12     | (a) Describe all statistical methods, including those used to control for confounding                                                                                                | 6                     |
|                              |        | (b) Describe any methods used to examine subgroups and interactions                                                                                                                  | 6                     |
|                              |        | (c) Explain how missing data were addressed                                                                                                                                          | 6                     |
|                              |        | (d) If applicable, describe analytical methods taking account of sampling strategy                                                                                                   | 6                     |
|                              |        | (e) Describe any sensitivity analyses                                                                                                                                                | 6                     |
| <b>Results</b>               |        |                                                                                                                                                                                      |                       |

|                          |     |                                                                                                                                                                                                              |           |
|--------------------------|-----|--------------------------------------------------------------------------------------------------------------------------------------------------------------------------------------------------------------|-----------|
| Participants             | 13* | (a) Report numbers of individuals at each stage of study—eg numbers potentially eligible, examined for eligibility, confirmed eligible, included in the study, completing follow-up, and analysed            |           |
|                          |     | (b) Give reasons for non-participation at each stage                                                                                                                                                         | NA        |
|                          |     | (c) Consider use of a flow diagram                                                                                                                                                                           | 6         |
| Descriptive data         | 14* | (a) Give characteristics of study participants (eg demographic, clinical, social) and information on exposures and potential confounders                                                                     | 7-8       |
|                          |     | (b) Indicate number of participants with missing data for each variable of interest                                                                                                                          | 7-8       |
| Outcome data             | 15* | Report numbers of outcome events or summary measures                                                                                                                                                         | 10 and 14 |
| Main results             | 16  | (a) Give unadjusted estimates and, if applicable, confounder-adjusted estimates and their precision (eg, 95% confidence interval). Make clear which confounders were adjusted for and why they were included | 10        |
|                          |     | (b) Report category boundaries when continuous variables were categorized                                                                                                                                    | 15-17     |
|                          |     | (c) If relevant, consider translating estimates of relative risk into absolute risk for a meaningful time period                                                                                             | NA        |
| Other analyses           | 17  | Report other analyses done—eg analyses of subgroups and interactions, and sensitivity analyses                                                                                                               | NA        |
| <b>Discussion</b>        |     |                                                                                                                                                                                                              |           |
| Key results              | 18  | Summarise key results with reference to study objectives                                                                                                                                                     | 18-20     |
| Limitations              | 19  | Discuss limitations of the study, taking into account sources of potential bias or imprecision. Discuss both direction and magnitude of any potential bias                                                   | 21        |
| Interpretation           | 20  | Give a cautious overall interpretation of results considering objectives, limitations, multiplicity of analyses, results from similar studies, and other relevant evidence                                   | 21        |
| Generalisability         | 21  | Discuss the generalisability (external validity) of the study results                                                                                                                                        | 21        |
| <b>Other information</b> |     |                                                                                                                                                                                                              |           |
| Funding                  | 22  | Give the source of funding and the role of the funders for the present study and, if applicable, for the original study on which the present article is based                                                | 22        |

\*Give information separately for cases and controls in case-control studies and, if applicable, for exposed and unexposed groups in cohort and cross-sectional studies.

**Note:** An Explanation and Elaboration article discusses each checklist item and gives methodological background and published examples of transparent reporting. The STROBE checklist is best used in conjunction with this article (freely available on the Web sites of PLoS Medicine at <http://www.plosmedicine.org/>, Annals of Internal Medicine at <http://www.annals.org/>, and Epidemiology at <http://www.epidem.com/>). Information on the STROBE Initiative is available at [www.strobe-statement.org](http://www.strobe-statement.org).
