# Supplementary material for: Multicentre point-prevalence survey of antibiotic use and healthcare-associated infections in Ethiopian hospitals
Source: PubMed Central journal article supplement — BMJ Open. 2022 Feb 11;12(2):e054541. doi: 10.1136/bmjopen-2021-054541 (PMC8845215; doi:10.1136/bmjopen-2021-054541), 2022-02-11
Supplement: bmjopen-2021-054541supp001.pdf [file bmjopen-2021-054541supp001.pdf]

## Supplementary file

**Table 1: Ethiopia's healthcare system profile**

| S.N | Variable                                                                                                    | Response             |
|-----|-------------------------------------------------------------------------------------------------------------|----------------------|
| 1.  | ISO code of Ethiopia                                                                                        | ETH                  |
| 2.  | Total number of hospitals at any level (tertiary, secondary, primary and specialized) in the country.       | 464                  |
| 3.  | Number of public hospitals in the country.                                                                  | 378                  |
| 4.  | Estimated number of private hospitals in the country                                                        | 86                   |
| 5.  | Estimated number of tertiary level (university teaching and specialized hospital) hospitals in the country. | 25                   |
| 6.  | Number of secondary level (General) hospitals in the country.                                               | 58                   |
| 7.  | Estimated number of primary hospitals in the country.                                                       | 381                  |
| 8.  | Is Hospital grouping exist in the country                                                                   | No                   |
| 9.  | Hospital survey sampling strategy                                                                           | Convenience sampling |
| 10  | Number of hospitals for the survey                                                                          | <b>10</b>            |
| 11  | Does a national treatment guideline exist?                                                                  | Yes                  |
| 12  | Does facility-based treatment guidelines exist                                                              | No                   |
| 13  | Does a national hospital ASP exists                                                                         | Yes                  |

**Table 2: The 10 surveyed hospitals profile**

| S.N | Variable                                                                                  | Mean $\pm$ SD     | Median(Range)        |
|-----|-------------------------------------------------------------------------------------------|-------------------|----------------------|
| 1.  | Number of beds in the surveyed hospitals                                                  | 443 $\pm$ 164     | 410(223-700)         |
| 2.  | Number of acute care beds                                                                 | 349 $\pm$ 134     | 314(186-600)         |
| 3.  | Number of intensive care unit beds                                                        | 34 $\pm$ 24       | 32(6-82)             |
| 4.  | Number of high risk beds                                                                  | 22 $\pm$ 19       | 18(0-51)             |
| 5.  | Annual overall admissions in the hospitals in the previous physical year, i.e. 2012 E.C.# | 16471 $\pm$ 7405  | 13885 (7025-30456)   |
| 6.  | Overall patient days in the hospitals for the previous physical year i.e. 2012 E.C.*      | 94679 $\pm$ 45583 | 79254(48931-176,742) |
| 7.  | Average length of hospital stay in days                                                   | 6.53 $\pm$ 1.48   | 6.0(4.8-10.2)        |
| 8.  | Sum of the number of beds of the wards included in the survey (Total= 2628 beds)          | 293 $\pm$ 153     | 214(103-541)         |
| 9.  | Number of patients eligible for inclusion in the survey. (Total= 2209 patients)           | 240 $\pm$ 115     | 203(103-474)         |
| 10. | Number of patients included in the survey (Total= 1820).                                  | 182 $\pm$ 61      | 161(103-325)         |

#emergency admission over 24 hours was not included. \* **Patient days:** over all admission \* average length of hospital stay.

### Current and past medical history, January 7-29, 2021 G.C.

| Variable                                       |         | Number of patients | Percentage |
|------------------------------------------------|---------|--------------------|------------|
| <b>Current hospitalization malarial status</b> | Yes     | 33                 | 1.8        |
|                                                | No      | 1439               | 79.1       |
|                                                | Unknown | 348                | 19.1       |
| <b>Previous malarial treatment history</b>     | Yes     | 41                 | 2.3        |
|                                                | No      | 1517               | 83.3       |
|                                                | Unknown | 262                | 14.4       |
| <b>Active tuberculosis</b>                     | Yes     | 76                 | 4.2        |

|                                                           |         |      |      |
|-----------------------------------------------------------|---------|------|------|
|                                                           | No      | 1499 | 82.4 |
|                                                           | Unknown | 245  | 13.4 |
| <b>COPD</b>                                               | Yes     | 28   | 1.5  |
|                                                           | No      | 1792 | 98.5 |
| <b>Malnutrition</b>                                       | Yes     | 277  | 15.2 |
|                                                           | No      | 1543 | 84.8 |
| <b>McCabe Score</b>                                       | RF      | 86   | 4.7  |
|                                                           | UF      | 258  | 14.2 |
|                                                           | NF      | 1476 | 81.1 |
| <b>Referred from another hospital</b>                     |         | 501  | 27.5 |
| <b>Referred from another facility other than hospital</b> |         | 447  | 25.1 |
| <b>Hospitalization history within 90 days</b>             |         | 562  | 30.9 |

RF= Rapidly fatal, UF= Ultimately fatal, NF= Non-fatal, COPD= Chronic obstructive pulmonary disease, RVI= Retroviral infection

**Table 3: Existing surveyed hospitals capacity to promote rational use of antibiotics**

| <b>Variable</b>                                                                                               | <b>Yes, N(%)</b> |
|---------------------------------------------------------------------------------------------------------------|------------------|
| <b>Hospital infrastructure</b>                                                                                |                  |
| Functioning Drugs and Therapeutics Committee                                                                  | 8(80.0)          |
| Functioning Infection Prevention & Control Committee                                                          | 10(100.0)        |
| Microbiological laboratory service                                                                            | 8(80.0)          |
| Availability of a formal organizational structure responsible for ASP                                         | 10(100.0)        |
| A physician ASP leader                                                                                        | 10(100.0)        |
| Availability of a ASP team                                                                                    | 7(70.0)          |
| Availability of functional ASP in the hospital                                                                | 0(0.0)           |
| Availability of pharmacist responsible for ensuring appropriate antibiotic use                                | 9(90.0)          |
| Incentive package for dedicated staff for ASP                                                                 | 0(0.0)           |
| IT support for ASP                                                                                            | 0(0.0)           |
| Availability of outpatient parenteral antibiotic therapy (OPAT) unit                                          | 0(0.0)           |
| <b>Policy and practice</b>                                                                                    |                  |
| Availability of antibiotic formulary (including unrestricted and restricted antibiotics) updated continuously | 0(0.0)           |
| Antibiotic formulary based on the Essential Drug List                                                         | 0(0.0)           |
| Institutional antibiotic guideline                                                                            | 3(30.0)          |
| Institutional antibiotic guidelines based on local Antibiogram                                                | 1(10.0)          |

|                                                                                             |                                                                                                                                                                                                                                                                                  |                             |
|---------------------------------------------------------------------------------------------|----------------------------------------------------------------------------------------------------------------------------------------------------------------------------------------------------------------------------------------------------------------------------------|-----------------------------|
| A written policy that requires prescribers to document an indication in the medical records |                                                                                                                                                                                                                                                                                  | 2(20.0)                     |
| Preauthorization policy                                                                     |                                                                                                                                                                                                                                                                                  | 1(10.0)                     |
| Post-prescription review service                                                            |                                                                                                                                                                                                                                                                                  | 7(70.0)                     |
| <b>Monitoring and feedback</b>                                                              |                                                                                                                                                                                                                                                                                  |                             |
| Monitoring of antibiotics indications on medical record                                     |                                                                                                                                                                                                                                                                                  | 5(50.0)                     |
| Monitoring of surgical antibiotic prophylaxis choice and duration                           |                                                                                                                                                                                                                                                                                  | 2(20.0)                     |
| Results of antibiotic audits are communicated directly with prescribers                     |                                                                                                                                                                                                                                                                                  | 7(70.0)                     |
| Monitor of antibiotic use                                                                   |                                                                                                                                                                                                                                                                                  | 1(10.0)                     |
| Monitoring of antibiotic use by DDD or DOT                                                  |                                                                                                                                                                                                                                                                                  | 0(0.0)                      |
| Antibiotic use reported by hospital activity denominator                                    |                                                                                                                                                                                                                                                                                  | 0(0.0)                      |
| Annual report focused on ASP in the past year                                               |                                                                                                                                                                                                                                                                                  | 2(20.0)                     |
| A cumulative antibiotic susceptibility report in the past year                              |                                                                                                                                                                                                                                                                                  | 3(30.0)                     |
| A national antibiotic resistance surveillance program participation                         |                                                                                                                                                                                                                                                                                  | 4(40.0)                     |
| A national antibiotic use surveillance program participation                                |                                                                                                                                                                                                                                                                                  | 0(0.0)                      |
| Number of blood cultures done in the past year, N= 7- hospitals                             | Mean ± SD                                                                                                                                                                                                                                                                        | 2625 ± 3307                 |
|                                                                                             | Median(Range)<br>IQR                                                                                                                                                                                                                                                             | 1707(452-9860),<br>680-2786 |
| List of antibiotics out of stock at the facility during the survey period.                  | Cefepime 1g, Meropenam 1g and 0.5g, Piperacillin-Tazobactam 4.5g, Ciprofloxacin 0.4mg , ceftazidime 1gm, Metronidazole 0.5g and Gentamycin 80mg injections were stock out in all of the surveyed hospitals. Vancomycin 1g and 0.5g was also stock out at two surveyed hospitals. |                             |

**Table 5: Antibiotics prescription and indication**

| Variable                                                                                                     | Number | Percentage |
|--------------------------------------------------------------------------------------------------------------|--------|------------|
| <b>Total number of antibiotics prescribed since admission</b>                                                | 3192   |            |
| <b>Number of antibiotics prescribed/ patient since admission: N= 1410 patients</b>                           |        |            |
| 1                                                                                                            | 379    | 26.9       |
| 2                                                                                                            | 632    | 44.8       |
| 3                                                                                                            | 203    | 14.3       |
| 4                                                                                                            | 117    | 8.3        |
| 5                                                                                                            | 42     | 3.0        |
| 6                                                                                                            | 19     | 1.3        |
| Others*                                                                                                      | 18     | 1.2        |
| Overall antibiotics prescribed on the day of survey                                                          | 2058   |            |
| <b>Number of antibiotics given/patient at a time of survey: N= 1162 patients</b>                             |        |            |
| 1                                                                                                            | 432    | 37.1       |
| 2                                                                                                            | 585    | 50.4       |
| 3                                                                                                            | 124    | 10.7       |
| 4                                                                                                            | 18     | 1.6        |
| 5                                                                                                            | 3      | 0.3        |
| <b>Route of administration: N= 2059 antibiotics</b>                                                          |        |            |
| Oral                                                                                                         | 201    | 9.8        |
| Parenteral                                                                                                   | 1858   | 90.2       |
| <b>Antibiotics prescription note: N= 2059 antibiotics</b>                                                    |        |            |
| Brand                                                                                                        | 61     | 2.9        |
| Generic                                                                                                      | 1998   | 97.1       |
| <b>Indication of antibiotics written on patient notes: N= 1162 patients</b>                                  |        |            |
| No                                                                                                           | 51     | 4.4        |
| Yes                                                                                                          | 1111   | 95.6       |
| <b>Antibiotics duration in days ( From time of initiation to survey date):Median: 5 days; IQR: 3-10 days</b> |        |            |
| <b>Type of treatment**, N=866 patients</b>                                                                   |        |            |
| Empiric                                                                                                      | 837    | 96.7       |
| Definitive                                                                                                   | 29     | 3.3        |
| <b>Guideline compliance</b>                                                                                  |        |            |
| Yes                                                                                                          | 637    | 54.8       |
| No                                                                                                           | 255    | 21.9       |
| Not assessable                                                                                               | 237    | 20.4       |
| No information                                                                                               | 33     | 2.8        |
| <b>Prescriber type</b>                                                                                       |        |            |
| General practitioner                                                                                         | 178    | 15.3       |
| Resident                                                                                                     | 949    | 81.7       |
| Specialist                                                                                                   | 35     | 3.0        |

\***Others:** 7 antibiotics= 5 patients; 8 antibiotics=8 patients; 9 antibiotics=3 patients; 10 antibiotics= 1 patient; 12 antibiotics=1 patient; \*\*Is only for patients whose antibiotics indication is for HCAs and CAs
